# Supplementary material for: Building protein-protein interaction networks for Leishmania species through protein structural information
Source: BMC Bioinformatics. 2018 Mar 6;19:85. doi: 10.1186/s12859-018-2105-6 (PMC5840830; doi:10.1186/s12859-018-2105-6)
Supplement: Supplementary file 5 — Value of the Betweenness Centrality topological index of all proteins present in the networks used in this study. (XLSX 290 kb) [file 12859_2018_2105_MOESM5_ESM.xlsx]

## Sheet: Página1
Betweenness centrality - NPTSI - L. braziliensis			Betweenness centrality - NPTIM - L. braziliensis			Betweenness centrality - MN - L. braziliensis			Betweenness centrality - NPTSI - L. infantum			Betweenness centrality - NPTIM - L. infantum			Betweenness centrality - MN - L. infantum
Rank	Name	Score	Rank	Name	Score	Rank	Name	Score	Rank	Name	Score	Rank	Name	Score	Rank	Name	Score
1	LbrM.20.0710	8.18155e+15	1	LbrM.13.0260	1.02322e+16	1	LbrM.13.0260	7.30066e+15	1	LinJ.19.1480	1.27039e+15	1	LinJ.13.0280	9.45864e+15	1	LinJ.13.0280	7.25001e+15
2	LbrM.16.0260	2.45109e+16	2	LbrM.34.4980	6.01174e+15	2	LbrM.25.1710	5.99145e+15	2	LinJ.34.2160	4.02936e+16	2	LinJ.35.5360	6.70336e+15	2	LinJ.24.0740	6.20794e+15
3	LbrM.20.0040	2332311928279	3	LbrM.33.1290	5.73343e+16	3	LbrM.34.4980	5.32272e+15	3	LinJ.05.0960	3.4267e+16	3	LinJ.33.1150	6.19319e+15	3	LinJ.35.5360	5.87545e+15
4	LbrM.24.1480	1.84872e+16	4	LbrM.35.1780	5.57786e+16	4	LbrM.10.0880	5.2306e+16	4	LinJ.35.4950	2.44052e+15	4	LinJ.36.1700	5.90238e+16	4	LinJ.36.1700	5.7385e+15
5	LbrM.17.1570	1.50888e+16	5	LbrM.10.0880	5.01296e+15	5	LbrM.04.0500	4.94439e+15	5	LinJ.17.1540	1.43812e+16	5	LinJ.26.1360	551596798932293	5	LinJ.17.1510	5.4405e+15
6	LbrM.20.5920	1.31594e+16	6	LbrM.22.1440	4.15664e+15	6	LbrM.33.1290	4.94224e+16	6	LinJ.09.1160	1.25492e+15	6	LinJ.10.0830	5.0145e+16	6	LinJ.22.0013	5.28997e+15
7	LbrM.21.0730	1.16775e+16	7	LbrM.26.1400	4.13998e+16	7	LbrM.07.1200	4.82809e+15	7	LinJ.35.5300	1.24248e+16	7	LinJ.22.1390	4.85663e+15	7	LinJ.25.2220	5.2783e+15
8	LbrM.35.3670	1.16657e+16	8	LbrM.22.0110	4.11586e+15	8	LbrM.30.1240	4.62219e+16	8	LinJ.34.2710	1.22108e+16	8	LinJ.15.1500	4.67435e+15	8	LinJ.10.0830	4.86036e+16
9	LbrM.15.0970	1.07252e+16	9	LbrM.15.1440	4.11314e+15	9	LbrM.35.1780	430460671657629	9	LinJ.32.0520	1.07931e+16	9	LinJ.34.1110	4.54495e+15	9	LinJ.06.1110	4.84719e+15
10	LbrM.13.0890	9.24657e+15	10	LbrM.25.2330	4.08544e+15	10	LbrM.29.2140	4.24028e+15	10	LinJ.35.0320	1.05021e+16	10	LinJ.22.0013	4.5051e+16	10	LinJ.33.1150	4.52319e+16
11	LbrM.20.5850	7.53651e+15	11	LbrM.27.1850	3.67752e+15	11	LbrM.35.1010	4.13182e+15	11	LinJ.35.4170	1.0358e+16	11	LinJ.27.1610	4.41546e+16	11	LinJ.21.0770	443509890338844
12	LbrM.27.1920	7.20831e+15	12	LbrM.20.1010	3.55322e+15	12	LbrM.22.0110	4.06252e+16	12	LinJ.29.0670	1.03398e+16	12	LinJ.25.1740	4.41171e+15	12	LinJ.11.0100	4.42085e+16
13	LbrM.25.1710	6.90644e+15	13	LbrM.12.0270	3.37572e+15	13	LbrM.20.1010	3.99193e+15	13	LinJ.13.0990	1.01438e+16	13	LinJ.17.1510	4.23282e+15	13	LinJ.36.0950	4.40095e+15
14	LbrM.05.0980	6.50569e+15	14	LbrM.35.4150	3.32131e+15	14	LbrM.35.4150	3.79369e+16	14	LinJ.24.0740	1.01296e+16	14	LinJ.11.0100	4.22472e+16	14	LinJ.27.0620	4.34801e+16
15	LbrM.04.0500	6.40975e+15	15	LbrM.35.5340	3.2873e+15	15	LbrM.26.1400	3.74376e+15	15	LinJ.11.1200	1.01077e+16	15	LinJ.12.0230	4.12365e+15	15	LinJ.22.1390	4.31276e+15
16	LbrM.34.1140	638061395175696	16	LbrM.30.0220	3.26069e+16	16	LbrM.25.2330	3.70437e+15	16	LinJ.35.1230	1.00377e+16	16	LinJ.21.0770	4.00691e+15	16	LinJ.20.0630	4.30747e+16
17	LbrM.28.2170	6.1035e+15	17	LbrM.34.1330	322874649219748	17	LbrM.22.1440	365752507697454	17	LinJ.07.0570	9.20424e+15	17	LinJ.14.1240	3.92677e+15	17	LinJ.26.1360	4.29589e+16
18	LbrM.23.1080	5.78261e+15	18	LbrM.20.4800	3.18731e+16	18	LbrM.35.5180	357678487266747	18	LinJ.27.2570	9.20346e+15	18	LinJ.20.0630	3.89488e+15	18	LinJ.30.1180	4.24346e+15
19	LbrM.34.0740	5.00261e+15	19	LbrM.29.2140	3.17161e+15	19	LbrM.20.0710	3.5211e+16	19	LinJ.03.0190	9.20154e+15	19	LinJ.05.0510	3.88878e+15	19	LinJ.12.0230	4.19924e+15
20	LbrM.15.1080	4.92358e+15	20	LbrM.35.5900	313010595375147	20	LbrM.12.0270	3.52025e+15	20	LinJ.04.1220	8.6396e+15	20	LinJ.20.0720	3.7577e+15	20	LinJ.27.2260	4.1677e+16
21	LbrM.07.1200	4.91747e+15	21	LbrM.19.0220	3.09545e+15	21	LbrM.11.0040	3.51887e+15	21	LinJ.18.0560	7.82707e+15	21	LinJ.36.5870	368537113342643	21	LinJ.34.1110	4.16487e+16
22	LbrM.35.4000	4.74961e+15	22	LbrM.32.3600	3.08734e+16	22	LbrM.30.3420	3.48578e+15	22	LinJ.31.0580	7.7952e+15	22	LinJ.30.0210	3.64539e+15	22	LinJ.36.5160	4.13515e+15
23	LbrM.08.0330	4.15873e+15	23	LbrM.09.0070	3.0346e+15	23	LbrM.09.0070	3.46568e+15	23	LinJ.09.0970	7.62491e+15	23	LinJ.35.1420	3.62541e+15	23	LinJ.26.2740	4.0891e+15
24	LbrM.15.1100	4.03814e+16	24	LbrM.33.0340	2.98268e+16	24	LbrM.20.5850	3.45173e+15	24	LinJ.04.0960	7.51687e+15	24	LinJ.09.0070	3.61394e+15	24	LinJ.27.1610	4.07878e+15
25	LbrM.07.0900	3.93208e+16	25	LbrM.30.1240	2.97782e+16	25	LbrM.15.1440	3.4279e+15	25	LinJ.21.0300	7.27266e+15	25	LinJ.36.4100	3.59485e+15	25	LinJ.25.1740	4.07369e+15
26	LbrM.18.0540	3.74912e+15	26	LbrM.27.2520	2.96953e+16	26	LbrM.27.1850	3.3815e+15	26	LinJ.27.0580	6.98154e+15	26	LinJ.36.0950	356349246939429	26	LinJ.35.4950	3.99129e+15
27	LbrM.17.1560	3.54523e+15	27	LbrM.14.1330	2.95473e+15	27	LbrM.34.0010	3.16169e+15	27	LinJ.32.3820	6.60873e+15	27	LinJ.32.3510	3.49977e+15	27	LinJ.15.1500	3.84077e+15
28	LbrM.35.6110	3.47974e+15	28	LbrM.05.0520	2.95267e+16	28	LbrM.27.0850	3.12832e+16	28	LinJ.27.1970	6.04787e+16	28	LinJ.29.2270	3.39865e+15	28	LinJ.30.3430	3.8271e+16
29	LbrM.30.2680	3.15475e+16	29	LbrM.35.1010	2.91817e+15	29	LbrM.33.0340	3.10361e+16	29	LinJ.28.1390	5.83111e+16	29	LinJ.30.3430	3.29977e+15	29	LinJ.24.2150	3.67695e+15
30	LbrM.11.0040	3.0472e+16	30	LbrM.21.0770	2.87955e+15	30	LbrM.14.1330	3.09251e+16	30	LinJ.29.0060	5.47672e+15	30	LinJ.27.2260	3.27654e+15	30	LinJ.30.3620	3.66433e+15
31	LbrM.34.1400	3.03434e+15	31	LbrM.20.4890	2.83148e+15	31	LbrM.20.4800	3.08354e+16	31	LinJ.21.0310	5.39487e+16	31	LinJ.25.2220	3.20461e+15	31	LinJ.28.1240	3.64849e+15
32	LbrM.31.0550	2.94868e+15	32	LbrM.20.5360	2.82991e+15	32	LbrM.30.0220	3.03764e+16	32	LinJ.04.0680	5.32403e+15	32	LinJ.24.2150	3.19761e+16	32	LinJ.05.0510	3.63729e+15
33	LbrM.26.0830	2.91669e+16	33	LbrM.21.2070	2.81551e+16	33	LbrM.26.0130	2.99535e+15	33	LinJ.30.0940	5.20132e+15	33	LinJ.21.2130	3.13559e+15	33	LinJ.36.4100	3.62163e+15
34	LbrM.27.0850	2.87008e+15	34	LbrM.30.3680	2.73328e+16	34	LbrM.34.1330	2.90553e+15	34	LinJ.35.0770	5.06694e+15	34	LinJ.22.1060	3.1034e+16	34	LinJ.29.0060	3.56123e+15
35	LbrM.31.0100	2.76304e+16	35	LbrM.34.3940	2.72161e+15	35	LbrM.21.0770	2.88838e+15	35	LinJ.24.2220	4.9359e+15	35	LinJ.36.5160	3.07867e+15	35	LinJ.09.0070	3.44766e+15
36	LbrM.33.2210	2.75018e+15	36	LbrM.35.5180	2.71188e+16	36	LbrM.29.2280	2.88611e+16	36	LinJ.35.2720	4.34746e+16	36	LinJ.06.1110	2.98236e+16	36	LinJ.30.0210	3.44427e+16
37	LbrM.04.0880	2.68085e+16	37	LbrM.30.3420	2.67337e+16	37	LbrM.05.0520	2.80545e+15	37	LinJ.26.2740	4.34323e+15	37	LinJ.30.3170	2.95555e+16	37	LinJ.35.0320	3.33279e+16
38	LbrM.17.0610	2.66748e+15	38	LbrM.25.1710	2.64339e+15	38	LbrM.20.5360	2.79687e+16	38	LinJ.29.0070	4.31353e+15	38	LinJ.35.4000	2.88446e+15	38	LinJ.14.1240	3.27252e+16
39	LbrM.08.0360	2.65979e+15	39	LbrM.34.3860	2.48843e+16	39	LbrM.19.0220	2.77477e+16	39	LinJ.30.1180	425796830280825	39	LinJ.30.1180	2.83804e+16	39	LinJ.13.0990	3.26464e+15
40	LbrM.24.2280	2.65018e+16	40	LbrM.35.3210	2.48362e+16	40	LbrM.30.2040	2.76839e+15	40	LinJ.36.5350	4.22665e+15	40	LinJ.24.0740	2.79503e+16	40	LinJ.28.3140	3.2049e+16
41	LbrM.34.1300	2.62656e+16	41	LbrM.33.2820	2.47702e+16	41	LbrM.35.3670	2.75348e+16	41	LinJ.09.0720	3.67617e+15	41	LinJ.32.0080	2.78716e+16	41	LinJ.34.2710	3.16997e+16
42	LbrM.30.1240	2.55834e+15	42	LbrM.20.4990	2.47294e+16	42	LbrM.21.2070	2.72411e+15	42	LinJ.08.0300	3.62397e+16	42	LinJ.33.0370	2.76595e+16	42	LinJ.35.1420	3.10493e+16
43	LbrM.15.1060	2.53888e+16	43	LbrM.09.0920	2.43759e+16	43	LbrM.32.3600	2.69506e+16	43	LinJ.34.0950	3.50029e+15	43	LinJ.36.5320	2.75376e+16	43	LinJ.05.0960	3.09174e+15
44	LbrM.20.0050	2.51544e+15	44	LbrM.32.0130	2.34169e+16	44	LbrM.33.2820	2.673e+16	44	LinJ.27.0620	347620341181548	44	LinJ.33.2680	2.73387e+16	44	LinJ.32.3510	3.08913e+15
45	LbrM.12.0020	2.41275e+15	45	LbrM.24.0740	2.33783e+16	45	LbrM.35.5900	2.66452e+16	45	LinJ.16.1450	3.33834e+16	45	LinJ.24.0870	2.73101e+16	45	LinJ.11.1200	3.07932e+16
46	LbrM.13.0200	2.3972e+16	46	LbrM.06.0100	2.33312e+15	46	LbrM.06.1050	2.63434e+15	46	LinJ.28.2220	3.26359e+15	46	LinJ.35.3920	2.66529e+15	46	LinJ.24.0870	3.00849e+16
47	LbrM.23.0400	2.00787e+16	47	LbrM.20.5830	2.32834e+16	47	LbrM.28.2620	2.6074e+16	47	LinJ.04.0330	3.23822e+15	47	LinJ.30.2970	2.64578e+16	47	LinJ.30.2970	2.9299e+16
48	LbrM.27.1200	1.94283e+16	48	LbrM.34.0010	2.32522e+16	48	LbrM.27.2520	2.58435e+16	48	LinJ.22.0770	3.20938e+16	48	LinJ.36.3140	2.60281e+16	48	LinJ.32.0080	2.92498e+16
49	LbrM.01.0740	1.87735e+16	49	LbrM.30.3120	2.31769e+15	49	LbrM.24.2110	2.57836e+16	49	LinJ.23.0570	3.16575e+16	49	LinJ.09.0890	2.60225e+16	49	LinJ.20.0720	2.91934e+16
50	LbrM.05.0560	1.87457e+16	50	LbrM.28.2620	2.29339e+15	50	LbrM.34.3940	2.5775e+16	50	LinJ.33.0260	2.86764e+15	50	LinJ.26.0120	2.58595e+16	50	LinJ.36.5870	2.91637e+16
51	LbrM.27.2230	1.84172e+16	51	LbrM.28.0960	2.23131e+15	51	LbrM.31.0100	2.55667e+16	51	LinJ.36.2140	2.85763e+16	51	LinJ.20.1640	2.54493e+16	51	LinJ.21.2130	2.87419e+16
52	LbrM.20.2040	1.81016e+16	52	LbrM.26.0300	2.21794e+16	52	LbrM.28.3120	2.50558e+16	52	LinJ.26.1550	280647694417495	52	LinJ.28.1240	2.50425e+16	52	LinJ.22.1060	2.86552e+16
53	LbrM.29.2280	1.78833e+16	53	LbrM.34.3250	2.20763e+16	53	LbrM.12.0490	2.49451e+16	53	LinJ.28.3060	2.78305e+15	53	LinJ.26.0260	2.45006e+16	53	LinJ.35.4000	2.83503e+16
54	LbrM.14.1240	1.78793e+15	54	LbrM.28.1220	2.15672e+16	54	LbrM.18.0540	2.48232e+15	54	LinJ.18.0480	2.64837e+16	54	LinJ.35.2710	2.43807e+16	54	LinJ.35.2200	2.82595e+16
55	LbrM.08.0060	1.75994e+16	55	LbrM.19.1790	2.14866e+15	55	LbrM.20.0040	2.43354e+16	55	LinJ.36.3860	2.50411e+16	55	LinJ.27.0930	2.43584e+15	55	LinJ.29.2270	2.81332e+16
56	LbrM.32.0530	1.75718e+16	56	LbrM.30.3350	2.12358e+16	56	LbrM.20.4890	2.38294e+16	56	LinJ.15.0990	2.49332e+16	56	LinJ.35.1890	2.3865e+16	56	LinJ.35.3920	2.71993e+16
57	LbrM.33.3050	1.73374e+16	57	LbrM.08.0880	2.10323e+16	57	LbrM.30.3350	2.3828e+16	57	LinJ.32.1920	2.4649e+16	57	LinJ.03.0030	2.37897e+16	57	LinJ.27.1970	2.60447e+16
58	LbrM.29.2470	1.7334e+15	58	LbrM.35.3170	2.09499e+16	58	LbrM.20.5830	2.37093e+15	58	LinJ.28.3140	2.39335e+15	58	LinJ.35.1720	2.37249e+15	58	LinJ.30.1800	2.57696e+16
59	LbrM.34.3580	1.70969e+16	59	LbrM.03.0050	2.06375e+16	59	LbrM.23.1720	2.33404e+15	59	LinJ.26.0470	2.26164e+15	59	LinJ.36.3100	2.36193e+16	59	LinJ.24.2110	2.56507e+15
60	LbrM.06.0940	1.69229e+16	60	LbrM.21.2010	2.06144e+15	60	LbrM.34.1630	2.30765e+16	60	LinJ.16.0560	2.2586e+15	60	LinJ.35.3390	2.3094e+16	60	LinJ.06.0890	2.54526e+16
61	LbrM.26.0050	1.64716e+16	61	LbrM.07.1200	2.04948e+16	61	LbrM.34.3860	2.30012e+15	61	LinJ.36.6340	2.23185e+16	61	LinJ.36.4030	2.25325e+16	61	LinJ.01.0470	2.50504e+15
62	LbrM.29.2360	1.64172e+15	62	LbrM.07.0060	2.04143e+15	62	LbrM.33.2210	2.29317e+16	62	LinJ.28.2280	2.22959e+15	62	LinJ.34.0670	219553557737812	62	LinJ.26.0120	2.49954e+16
63	LbrM.27.2510	1.62886e+15	63	LbrM.35.4070	2.0405e+15	63	LbrM.30.1840	2.28141e+16	63	LinJ.34.3670	2.13726e+15	63	LinJ.36.0240	2.19434e+15	63	LinJ.30.3170	2.47669e+15
64	LbrM.25.0260	1.59365e+16	64	LbrM.06.1050	2.0279e+16	64	LbrM.30.3680	2.27715e+16	64	LinJ.32.2330	2.0617e+16	64	LinJ.34.0590	2.19258e+16	64	LinJ.30.2100	2.46513e+16
65	LbrM.26.0200	1.58909e+15	65	LbrM.34.1630	1.99905e+16	65	LbrM.09.0920	2.27077e+16	65	LinJ.15.1080	2.05138e+15	65	LinJ.20.0820	2.15166e+16	65	LinJ.21.2070	2.4029e+15
66	LbrM.30.1840	1.56928e+15	66	LbrM.30.0620	1.97403e+16	66	LbrM.21.2010	2.26794e+16	66	LinJ.20.0080	192827689345327	66	LinJ.07.1300	2.14995e+16	66	LinJ.20.1640	2.39498e+16
67	LbrM.31.2520	1.46873e+16	67	LbrM.20.0580	1.95614e+15	67	LbrM.24.0740	2.26684e+16	67	LinJ.09.0070	1.89587e+16	67	LinJ.28.0980	2.14917e+15	67	LinJ.04.0960	2.38385e+16
68	LbrM.30.0180	1.43485e+15	68	LbrM.27.0850	1.89724e+15	68	LbrM.34.3990	2.25631e+16	68	LinJ.25.2220	1.88347e+16	68	LinJ.30.1800	2.13781e+15	68	LinJ.30.0940	2.3834e+15
69	LbrM.33.0920	1.3471e+15	69	LbrM.35.0300	1.87862e+16	69	LbrM.34.1140	2.2511e+16	69	LinJ.36.6190	1.86642e+16	69	LinJ.30.0490	2.12702e+16	69	LinJ.35.1720	2.37863e+16
69	LbrM.33.0930	1.3471e+15	70	LbrM.26.0130	187632604409574	70	LbrM.29.0160	2.23586e+16	70	LinJ.23.1170	1.82329e+16	70	LinJ.08.1020	2.12542e+15	70	LinJ.33.0370	2.3619e+16
71	LbrM.35.5180	1.32995e+16	71	LbrM.26.2680	1.86809e+15	71	LbrM.35.5340	2.23237e+15	71	LinJ.35.1390	1.79815e+15	71	LinJ.30.0560	2.11897e+16	71	LinJ.32.0520	2.36011e+16
72	LbrM.28.1630	129307582558112	72	LbrM.09.0450	1.8663e+15	72	LbrM.17.1530	2.2313e+16	72	LinJ.27.2360	1.65426e+15	72	LinJ.07.0210	2.09984e+16	72	LinJ.22.0770	2.34999e+16
73	LbrM.13.1440	1.28166e+16	73	LbrM.20.5370	1.85534e+15	73	LbrM.03.0050	2.22862e+16	73	LinJ.14.0910	1.64972e+16	73	LinJ.01.0470	2.04041e+16	73	LinJ.03.0030	2.29761e+15
74	LbrM.18.1190	1.24342e+15	74	LbrM.30.0560	1.82838e+16	74	LbrM.34.3250	2.18952e+15	74	LinJ.04.1140	1.60331e+16	74	LinJ.36.0620	2.02647e+16	74	LinJ.33.2680	2.28671e+16
75	LbrM.35.3290	1.23723e+16	75	LbrM.23.1320	1.82727e+15	75	LbrM.35.3210	218550493194144	75	LinJ.21.2240	1.53404e+16	75	LinJ.24.0860	2.02192e+15	75	LinJ.09.0890	2.27009e+16
76	LbrM.28.3120	1.20665e+16	76	LbrM.35.0680	1.82514e+16	76	LbrM.16.0260	2.15965e+15	76	LinJ.35.3370	1.5306e+16	76	LinJ.35.1310	2.00763e+16	76	LinJ.17.1540	226260211828665
77	LbrM.28.0510	1.19774e+16	77	LbrM.11.0040	1.82309e+15	77	LbrM.12.0810	2.11667e+15	77	LinJ.30.2850	1.50124e+15	77	LinJ.26.1530	2.00485e+15	77	LinJ.35.3390	2.24776e+15
78	LbrM.29.0160	1.17284e+16	78	LbrM.01.0500	1.81907e+16	78	LbrM.35.3290	2.10929e+15	78	LinJ.36.6370	1.4673e+16	78	LinJ.09.0490	2.00303e+16	78	LinJ.24.0860	2.22267e+16
79	LbrM.12.0810	1.1708e+16	79	LbrM.22.1120	1.81502e+16	79	LbrM.05.0800	208122566219091	79	LinJ.30.2780	1.44375e+15	79	LinJ.21.2070	199411196932069	79	LinJ.09.0490	2.21394e+15
80	LbrM.33.1610	1.15064e+16	80	LbrM.35.0270	1.79852e+16	80	LbrM.24.1480	2.07726e+16	80	LinJ.09.0980	1.43322e+16	80	LinJ.29.2310	1.9758e+16	80	LinJ.15.1080	2.19416e+16
81	LbrM.21.0290	1.14982e+16	81	LbrM.26.1570	1.75215e+16	81	LbrM.33.2590	2.07717e+16	81	LinJ.31.1640	1.41734e+16	81	LinJ.31.0200	1.94974e+16	81	LinJ.27.0930	2.18908e+16
82	LbrM.16.1460	1.12924e+16	82	LbrM.29.2180	1.75131e+16	82	LbrM.35.0400	2.07411e+16	82	LinJ.13.0330	1.37397e+15	82	LinJ.18.1360	1.94082e+16	82	LinJ.04.0440	2.18839e+16
83	LbrM.35.4420	1.11894e+16	83	LbrM.33.0400	1.75027e+16	83	LbrM.20.5370	2.06985e+16	83	LinJ.31.2400	1.31118e+16	83	LinJ.30.3620	193486159288143	83	LinJ.09.1160	2.15541e+16
84	LbrM.30.0960	1.08757e+16	84	LbrM.07.0660	1.73847e+16	84	LbrM.13.0890	2.04526e+16	84	LinJ.06.0910	1.30032e+16	84	LinJ.32.0920	1.92121e+15	84	LinJ.34.0940	2.13362e+16
85	LbrM.34.0280	1.06306e+16	85	LbrM.33.2590	1.73299e+15	85	LbrM.34.2090	2.03071e+15	85	LinJ.25.1430	1.26505e+15	85	LinJ.12.0490	1.89585e+15	85	LinJ.34.0590	2.12366e+16
86	LbrM.18.0220	1.06045e+15	86	LbrM.31.0300	1.73269e+16	86	LbrM.30.0620	2.00048e+16	86	LinJ.29.2910	1.2531e+16	86	LinJ.19.1560	1.88485e+16	86	LinJ.33.2430	2.10942e+15
87	LbrM.20.0470	1.04387e+16	87	LbrM.18.1410	1.72578e+15	87	LbrM.30.3120	1.98829e+16	87	LinJ.28.0420	1.24264e+16	87	LinJ.03.0960	1.87374e+16	87	LinJ.36.3100	2.10306e+15
88	LbrM.06.0850	1.01163e+16	88	LbrM.32.0960	1.69517e+15	88	LbrM.20.3170	1.98778e+16	88	LinJ.24.2150	1.23449e+16	88	LinJ.20.1390	1.85983e+15	88	LinJ.34.0670	2.09649e+15
89	LbrM.34.2040	9.98521e+15	89	LbrM.12.0810	1.69416e+16	89	LbrM.28.0960	1.974e+15	89	LinJ.06.1110	1.22671e+15	89	LinJ.30.3030	1.85962e+16	89	LinJ.18.0560	2.09429e+15
90	LbrM.20.3470	979656429753135	90	LbrM.34.1220	1.68943e+16	90	LbrM.32.0130	1.96233e+16	90	LinJ.08.1280	1.22619e+15	90	LinJ.06.0980	1.85277e+15	90	LinJ.05.0830	2.08645e+15
91	LbrM.23.1100	979404001714863	91	LbrM.27.0270	1.688e+16	91	LbrM.19.0670	1.96206e+16	91	LinJ.25.0780	1.18396e+16	91	LinJ.34.0940	1.84858e+15	91	LinJ.12.0490	2.0847e+16
92	LbrM.33.1830	9.75729e+15	92	LbrM.09.1130	168338956382609	92	LbrM.22.1120	1.95295e+16	92	LinJ.06.0890	1.17973e+16	92	LinJ.28.2600	1.83876e+16	92	LinJ.36.5350	2.07362e+15
93	LbrM.34.0010	9.70671e+15	93	LbrM.29.0130	1.68033e+16	93	LbrM.20.4990	1.93789e+15	93	LinJ.10.0200	1.17008e+16	93	LinJ.33.0420	1.83757e+16	93	LinJ.18.0480	2.04322e+15
94	LbrM.32.3610	9.59862e+15	94	LbrM.12.0490	1.67352e+15	94	LbrM.20.0580	1.91912e+16	94	LinJ.30.3650	1.16075e+16	94	LinJ.23.1460	1.83204e+16	94	LinJ.35.1230	2.02511e+16
95	LbrM.35.3430	953635828642754	95	LbrM.20.5560	1.66173e+16	95	LbrM.28.1220	1.89808e+16	95	LinJ.18.0630	1.14398e+16	95	LinJ.05.0830	1.82906e+16	95	LinJ.30.0560	2.00346e+15
96	LbrM.24.0370	9.4519e+15	96	LbrM.34.2090	1.65403e+16	96	LbrM.16.0560	1.89043e+15	96	LinJ.36.2130	1.12213e+15	96	LinJ.25.0120	1.81787e+15	96	LinJ.11.0350	1.97382e+16
97	LbrM.05.0310	9.43399e+15	97	LbrM.24.2140	1.63223e+16	97	LbrM.15.1060	1.88386e+16	97	LinJ.21.0740	108865048154486	97	LinJ.35.2200	1.79633e+16	97	LinJ.30.0490	1.96977e+15
98	LbrM.30.1010	9.38084e+15	98	LbrM.28.2990	1.62391e+16	98	LbrM.32.1200	1.88245e+16	98	LinJ.36.0950	1.08046e+15	98	LinJ.30.3360	1.79169e+15	98	LinJ.35.3590	1.95035e+16
99	LbrM.33.0911	9.22065e+15	99	LbrM.17.0880	1.6239e+16	99	LbrM.26.0300	1.87777e+16	99	LinJ.15.1140	1.06552e+16	99	LinJ.23.0580	1.78683e+15	99	LinJ.34.4270	1.94429e+16
100	LbrM.25.2310	9.20984e+15	100	LbrM.20.0500	1.60271e+16	100	LbrM.13.0200	1.87393e+16	100	LinJ.26.0380	1.0551e+16	100	LinJ.23.0120	1.77738e+16	100	LinJ.26.0260	1.93917e+16
101	LbrM.13.0270	9.19586e+15	101	LbrM.25.0120	1.59178e+15	101	LbrM.30.0560	1.85283e+15	101	LinJ.36.5410	1.0514e+16	101	LinJ.15.0270	1.77646e+16	101	LinJ.20.0820	1.92882e+16
102	LbrM.21.0310	9.15738e+15	102	LbrM.10.0210	1.58691e+16	102	LbrM.06.0100	1.83602e+16	102	LinJ.06.1330	1.04979e+15	102	LinJ.33.3360	1.77277e+16	102	LinJ.36.0240	1.9206e+15
103	LbrM.32.2400	9.12162e+15	103	LbrM.25.0200	158320028804174	103	LbrM.35.3170	1.82891e+15	103	LinJ.32.3130	9.8377e+15	103	LinJ.09.1130	1.76799e+16	103	LinJ.07.1300	1.91373e+16
104	LbrM.29.0080	9.0402e+15	104	LbrM.15.0260	1.57268e+15	104	LbrM.01.0500	1.82792e+16	104	LinJ.33.1560	9.31528e+15	104	LinJ.24.1700	175829503626763	104	LinJ.30.3360	1.91078e+16
105	LbrM.32.2880	898909149959685	105	LbrM.05.0800	1.55114e+16	105	LbrM.08.0880	1.82715e+15	105	LinJ.24.1440	8.9587e+15	105	LinJ.27.0260	1.75371e+16	105	LinJ.35.1390	1.90854e+16
106	LbrM.28.2560	8.94009e+15	106	LbrM.17.0090	1.54223e+16	106	LbrM.25.2280	1.8252e+15	106	LinJ.24.2400	8.78195e+15	106	LinJ.33.2430	1.73194e+16	106	LinJ.31.0200	1.89291e+16
107	LbrM.19.0100	8.79913e+15	107	LbrM.33.1960	1.53504e+16	107	LbrM.17.1570	1.81956e+15	107	LinJ.25.2230	8.69429e+15	107	LinJ.25.0200	1.72011e+16	107	LinJ.35.5450	1.88949e+16
108	LbrM.30.3420	8.73847e+15	108	LbrM.34.3990	1.53019e+16	108	LbrM.24.2140	1.81786e+16	108	LinJ.36.2870	8.53581e+15	108	LinJ.10.0210	1.71631e+16	108	LinJ.25.1210	1.87456e+16
109	LbrM.08.0970	8.55152e+15	109	LbrM.23.0120	1.52595e+16	109	LbrM.28.2560	1.81087e+16	109	LinJ.08.1290	8.43953e+15	109	LinJ.30.2100	171396054159243	109	LinJ.36.5320	1.86068e+15
110	LbrM.31.3310	8.43575e+15	110	LbrM.20.3020	1.50032e+16	110	LbrM.35.4070	180317666009301	110	LinJ.30.0900	8.43008e+15	110	LinJ.32.2960	1.68846e+15	110	LinJ.36.4030	1.85451e+16
111	LbrM.15.0910	8.41985e+15	111	LbrM.31.0270	1.47804e+16	111	LbrM.32.3610	1.79682e+15	111	LinJ.15.0170	842358155716968	111	LinJ.27.0620	1.68122e+16	111	LinJ.28.2600	1.84986e+15
112	LbrM.23.1720	8.39772e+15	112	LbrM.27.1150	1.46562e+16	112	LbrM.18.1180	1.76766e+16	112	LinJ.29.2490	8.18152e+15	112	LinJ.34.3280	1.67735e+15	112	LinJ.25.0200	1.84524e+16
113	LbrM.23.0330	8.39284e+15	113	LbrM.35.1490	1.43616e+16	113	LbrM.31.0300	1.75055e+15	113	LinJ.06.0940	8.02528e+15	113	LinJ.27.0920	1.67627e+16	113	LinJ.19.0350	1.83169e+16
114	LbrM.20.4000	8.3416e+15	114	LbrM.33.1970	1.43392e+16	114	LbrM.20.5920	1.73722e+16	114	LinJ.11.0220	7.96812e+15	114	LinJ.17.0200	1.67597e+16	114	LinJ.35.1890	1.82589e+15
115	LbrM.12.0490	8.25101e+15	115	LbrM.03.0890	1.43187e+16	115	LbrM.23.1320	1.73014e+15	115	LinJ.22.1110	7.65784e+15	115	LinJ.25.1790	1.67417e+16	115	LinJ.28.0980	1.82535e+15
116	LbrM.35.2950	8.24761e+15	116	LbrM.24.1690	1.4233e+16	116	LbrM.33.0400	1.70266e+16	116	LinJ.33.0860	7.57177e+15	116	LinJ.35.4060	1.6682e+16	116	LinJ.32.1260	1.81856e+16
117	LbrM.12.0820	8.06684e+15	117	LbrM.25.2280	1.41549e+16	117	LbrM.29.0130	1.68818e+16	117	LinJ.16.1480	7.46016e+15	117	LinJ.04.0440	1.64904e+15	117	LinJ.23.0580	1.81718e+16
118	LbrM.03.0510	7.8164e+15	118	LbrM.35.3290	1.39312e+15	118	LbrM.27.1150	1.67791e+16	118	LinJ.30.2100	7.45572e+15	118	LinJ.34.3220	1.64776e+16	118	LinJ.36.3140	1.81368e+16
119	LbrM.20.0540	7.69485e+15	119	LbrM.34.3470	1.38345e+16	119	LbrM.18.1410	1.6768e+15	119	LinJ.35.4830	7.3904e+15	119	LinJ.35.5450	1.60809e+16	119	LinJ.31.0110	1.81121e+15
120	LbrM.18.0620	7.68972e+15	120	LbrM.35.5610	1.37426e+16	120	LbrM.35.0680	1.67579e+16	120	LinJ.36.3570	7.36098e+15	120	LinJ.06.0120	1.60486e+16	120	LinJ.21.0740	1.80254e+15
121	LbrM.22.0550	7.54951e+15	121	LbrM.33.3480	1.37073e+16	121	LbrM.20.0500	1.67177e+16	121	LinJ.34.3030	7.35381e+15	121	LinJ.36.1420	1.60032e+16	121	LinJ.18.1360	1.78803e+15
122	LbrM.14.1560	7.41607e+15	122	LbrM.20.3080	1.36279e+16	122	LbrM.30.0180	1.66916e+16	122	LinJ.13.1060	729446789093393	122	LinJ.11.0350	1.57018e+16	122	LinJ.13.1460	177912039575692
123	LbrM.34.2920	7.40119e+15	123	LbrM.31.2950	1.35405e+16	123	LbrM.17.0880	1.66244e+16	123	LinJ.15.0040	7.27303e+15	123	LinJ.24.2410	1.56389e+16	123	LinJ.36.0620	1.76939e+15
124	LbrM.35.1010	738807066775144	124	LbrM.20.0160	1.34885e+16	124	LbrM.26.1570	1.6153e+16	124	LinJ.36.4380	6.93056e+15	124	LinJ.28.1540	1.56081e+16	124	LinJ.26.1530	1.75484e+15
125	LbrM.35.7030	7305402627159	125	LbrM.28.2950	1.33893e+16	125	LbrM.35.0300	1.58166e+16	125	LinJ.13.1320	6.88647e+15	125	LinJ.17.0330	1.54166e+16	125	LinJ.28.2220	1.72869e+15
126	LbrM.06.0120	7.17936e+15	126	LbrM.19.0670	1.33533e+16	126	LbrM.21.0900	1.57955e+16	126	LinJ.36.5040	6.87551e+15	126	LinJ.35.3590	1.53716e+16	126	LinJ.33.3360	1.71652e+16
127	LbrM.27.0310	7.14887e+15	127	LbrM.26.2290	1.33417e+16	127	LbrM.16.0600	1.55981e+16	127	LinJ.29.0010	680559460310872	127	LinJ.30.2590	1.53069e+16	127	LinJ.28.1540	1.71073e+15
128	LbrM.30.2790	7.04741e+15	128	LbrM.35.7320	1.33018e+16	128	LbrM.30.3000	1.55815e+15	128	LinJ.23.0380	6.76518e+15	128	LinJ.19.0350	1.51901e+16	128	LinJ.03.0960	1.70888e+15
129	LbrM.27.2760	7.03086e+15	129	LbrM.16.0600	132626291729539	129	LbrM.35.5610	1.55585e+16	129	LinJ.29.2610	6.74516e+15	129	LinJ.33.2880	1.51553e+16	129	LinJ.33.1410	1.6986e+15
130	LbrM.06.0870	6.98634e+15	130	LbrM.35.4900	1.32574e+16	130	LbrM.20.0110	1.55478e+16	130	LinJ.33.1410	6.54711e+15	130	LinJ.34.3460	1.50984e+16	130	LinJ.17.0330	1.69514e+16
131	LbrM.33.1910	6.7853e+15	131	LbrM.06.0930	1.31657e+15	131	LbrM.17.0090	1.54971e+16	131	LinJ.30.1310	6.43757e+15	131	LinJ.13.0020	1.49394e+16	131	LinJ.36.5590	1.67709e+16
132	LbrM.32.2690	672958904722835	132	LbrM.17.1530	1.29113e+16	132	LbrM.26.2640	1.5471e+16	132	LinJ.18.0650	6.37208e+15	132	LinJ.36.5590	1.48557e+16	132	LinJ.17.0200	1.67483e+16
133	LbrM.34.2790	6.60806e+15	133	LbrM.21.0900	1.27192e+16	133	LbrM.27.0270	1.54098e+16	133	LinJ.28.1120	6.28055e+15	133	LinJ.30.0760	1.48291e+16	133	LinJ.16.0550	1.67464e+16
134	LbrM.27.0570	6.51937e+15	134	LbrM.30.2040	126640041634211	134	LbrM.20.3020	1.53938e+16	134	LinJ.36.3360	6.25241e+15	134	LinJ.33.1790	1.47779e+16	134	LinJ.07.0210	1.67151e+16
135	LbrM.01.0300	646144144592779	135	LbrM.11.0490	1.26399e+16	135	LbrM.29.2180	1.53713e+16	135	LinJ.25.1090	6.14782e+15	135	LinJ.35.1880	1.47725e+16	135	LinJ.08.1020	1.64455e+15
136	LbrM.20.1890	6.36639e+15	136	LbrM.30.0820	1.25567e+16	136	LbrM.06.0720	1.53256e+16	136	LinJ.11.1000	6.11976e+15	136	LinJ.33.1800	1.46894e+16	136	LinJ.33.0420	1.64265e+15
137	LbrM.27.1010	6.26973e+15	137	LbrM.04.0500	1.24428e+16	137	LbrM.28.2950	1.52164e+15	137	LinJ.35.0840	6.08125e+15	137	LinJ.04.1250	1.46734e+16	137	LinJ.32.0920	1.64195e+16
138	LbrM.35.2860	6.07436e+15	138	LbrM.27.0050	1.24382e+16	138	LbrM.09.1130	1.51277e+16	138	LinJ.36.4670	5.98968e+15	138	LinJ.21.0890	1.45826e+16	138	LinJ.23.1460	1.63455e+16
139	LbrM.33.2110	6.02391e+15	139	LbrM.20.3260	1.2281e+16	139	LbrM.32.0960	1.49268e+16	139	LinJ.33.1740	598508011713901	139	LinJ.33.2210	143742942960763	139	LinJ.06.0980	1.60461e+16
140	LbrM.32.3910	5.92235e+15	140	LbrM.20.0110	1.22757e+15	140	LbrM.06.0120	1.49159e+16	140	LinJ.07.1320	5.89259e+15	140	LinJ.19.0540	1.43414e+15	140	LinJ.34.3280	1.58532e+16
141	LbrM.20.5500	5.91885e+15	141	LbrM.32.1350	1.22686e+16	141	LbrM.12.0020	1.47688e+16	141	LinJ.07.1000	581090602760819	141	LinJ.34.0030	1.432e+16	141	LinJ.35.4060	1.58475e+16
142	LbrM.21.1990	5.85723e+15	142	LbrM.13.0200	1.22004e+16	142	LbrM.10.0210	1.47398e+16	142	LinJ.27.2250	5.70677e+15	142	LinJ.34.2440	1.42517e+16	142	LinJ.13.0020	1.56733e+16
143	LbrM.30.2500	5.85231e+15	143	LbrM.11.0850	1.17523e+15	143	LbrM.27.2230	1.47148e+16	143	LinJ.35.2780	5.6034e+15	143	LinJ.36.4880	1.42319e+16	143	LinJ.04.0570	1.56636e+16
144	LbrM.26.1260	5.83134e+15	144	LbrM.33.3020	1.16661e+16	144	LbrM.35.4900	1.46818e+16	144	LinJ.30.1270	548757451141758	144	LinJ.28.3140	1.39392e+15	144	LinJ.10.0210	156053865481638
145	LbrM.16.1430	5.75626e+15	145	LbrM.06.0720	1.14892e+16	145	LbrM.34.1400	1.46484e+16	145	LinJ.24.0790	5.33802e+15	145	LinJ.11.1050	1.38814e+15	145	LinJ.27.0260	1.553e+16
146	LbrM.35.0940	5.73183e+15	146	LbrM.30.2550	1.14825e+15	146	LbrM.19.0860	1.4588e+15	146	LinJ.34.0130	5.30622e+15	146	LinJ.36.4180	1.37707e+15	146	LinJ.24.2410	1.55061e+16
147	LbrM.15.1250	5.62572e+15	147	LbrM.32.1200	1.14796e+16	147	LbrM.27.0510	1.45748e+15	147	LinJ.36.5960	5.23031e+15	147	LinJ.23.0300	1.37152e+16	147	LinJ.34.0080	1.54639e+16
148	LbrM.33.1160	5.55386e+15	148	LbrM.19.0860	1.1445e+16	148	LbrM.15.0260	1.45083e+16	148	LinJ.16.0760	5.09954e+15	148	LinJ.32.3340	1.36703e+16	148	LinJ.24.2220	1.54201e+16
149	LbrM.20.3980	5.55155e+15	149	LbrM.35.4230	1.14431e+16	149	LbrM.33.1960	1.42798e+15	149	LinJ.14.0180	5.04842e+16	149	LinJ.32.1260	1.36588e+15	149	LinJ.15.0270	1.54079e+16
150	LbrM.08.0900	5.55057e+15	150	LbrM.28.3120	1.13764e+16	150	LbrM.04.0630	1.42377e+16	150	LinJ.35.2200	5.03281e+15	150	LinJ.29.2420	1.36221e+16	150	LinJ.20.1390	1.53723e+15
151	LbrM.21.2150	5.42116e+15	151	LbrM.21.0440	1.13151e+16	151	LbrM.33.1970	1.41601e+16	151	LinJ.35.1700	4.97152e+16	151	LinJ.04.0570	1.36126e+16	151	LinJ.32.1110	1.53719e+16
152	LbrM.13.0190	5.36159e+15	152	LbrM.20.2170	1.13146e+16	152	LbrM.07.0060	1.41571e+16	152	LinJ.35.1740	4.94955e+15	152	LinJ.31.0110	1.35628e+16	152	LinJ.30.3030	1.52574e+16
153	LbrM.14.1600	533221845338957	153	LbrM.33.1600	1.13004e+16	153	LbrM.35.3430	1.41462e+16	153	LinJ.27.2260	4.91777e+15	153	LinJ.33.1410	1.35253e+16	153	LinJ.16.0760	1.52467e+15
154	LbrM.16.0560	5.31555e+15	154	LbrM.25.0190	1.11975e+16	154	LbrM.34.3470	1.41343e+16	154	LinJ.28.2040	4.90582e+16	154	LinJ.30.0470	1.34187e+16	154	LinJ.30.1880	1.52279e+15
155	LbrM.25.1700	5.19808e+15	155	LbrM.34.2990	1.11712e+16	155	LbrM.33.1600	1.41014e+16	155	LinJ.34.4270	4.89631e+15	155	LinJ.36.7280	1.33752e+16	155	LinJ.35.5300	1.51207e+15
156	LbrM.33.2840	5.19592e+15	156	LbrM.30.0540	1.11477e+15	156	LbrM.01.0740	1.40391e+15	156	LinJ.29.1230	4.82957e+15	156	LinJ.13.1460	1.33594e+16	156	LinJ.34.3220	1.5019e+16
157	LbrM.05.0940	5.118e+16	157	LbrM.16.0750	1.11469e+16	157	LbrM.34.2990	1.39577e+16	157	LinJ.04.0440	4.72242e+16	157	LinJ.34.0080	1.32323e+16	157	LinJ.32.2960	1.50174e+16
158	LbrM.26.0130	5.06137e+16	158	LbrM.20.1920	1.08388e+16	158	LbrM.34.2040	1.39162e+16	158	LinJ.13.0090	4.70982e+16	158	LinJ.16.0760	1.32136e+16	158	LinJ.36.3150	1.49987e+16
159	LbrM.20.5450	5.03067e+15	159	LbrM.10.0640	1.08215e+16	159	LbrM.05.0980	1.38404e+16	159	LinJ.22.0880	4.7e+16	159	LinJ.30.0650	1.31165e+16	159	LinJ.29.2310	1.49866e+15
160	LbrM.31.2810	5.00009e+15	160	LbrM.05.0940	1.08046e+15	160	LbrM.24.1690	1.382e+16	160	LinJ.02.0360	4.69464e+16	160	LinJ.16.0590	1.30374e+16	160	LinJ.19.0540	1.49813e+16
161	LbrM.31.2600	4.99358e+15	161	LbrM.32.3060	1.0794e+16	161	LbrM.35.4230	1.37888e+16	161	LinJ.06.0370	4.65511e+15	161	LinJ.10.0940	1.29691e+16	161	LinJ.07.1320	1.49621e+15
162	LbrM.17.0630	4.97503e+15	162	LbrM.28.1580	1.069e+16	162	LbrM.34.1300	1.37609e+15	162	LinJ.34.0070	464877337574706	162	LinJ.29.0250	1.28042e+16	162	LinJ.36.3220	1.49599e+16
163	LbrM.34.1630	4.93424e+15	163	LbrM.15.1380	1.06574e+16	163	LbrM.23.0120	1.3752e+15	163	LinJ.17.0190	4.56767e+16	163	LinJ.05.1040	1.27535e+16	163	LinJ.23.0120	1.4926e+16
164	LbrM.30.2040	4.93074e+16	164	LbrM.30.0710	1.06491e+16	164	LbrM.26.2290	1.37395e+15	163	LinJ.17.0200	4.56767e+16	164	LinJ.15.1490	1.27039e+16	164	LinJ.24.1700	1.48073e+16
165	LbrM.33.2030	4.87878e+15	165	LbrM.04.0630	1.06083e+16	165	LbrM.05.0940	1.37129e+15	163	LinJ.17.0100	4.56767e+16	165	LinJ.11.0710	1.26944e+16	165	LinJ.36.1420	1.47639e+16
166	LbrM.09.0960	4.84519e+15	166	LbrM.30.0180	1.04286e+16	166	LbrM.28.2990	1.36806e+15	163	LinJ.17.0170	4.56767e+16	166	LinJ.18.0780	1.26035e+16	166	LinJ.36.4880	1.47472e+16
167	LbrM.06.1270	4.83808e+16	167	LbrM.34.1800	1.03995e+16	167	LbrM.26.2680	1.36004e+16	167	LinJ.10.0900	4.5612e+15	167	LinJ.21.0440	1.24875e+16	167	LinJ.34.0030	1.47465e+16
168	LbrM.22.0510	4.73591e+16	168	LbrM.29.2280	1.03505e+16	168	LbrM.03.0890	1.35255e+16	168	LinJ.31.2320	4.55796e+16	168	LinJ.30.1880	1.23419e+16	168	LinJ.09.1130	1.47151e+16
169	LbrM.19.0190	4.72521e+15	169	LbrM.31.0100	1.02869e+16	169	LbrM.27.1920	1.34935e+16	169	LinJ.17.0700	4.55469e+15	169	LinJ.35.0030	1.23219e+16	169	LinJ.20.0060	1.46352e+16
170	LbrM.35.3850	4.69853e+15	170	LbrM.31.2560	1.02051e+16	170	LbrM.35.1490	1.348e+16	170	LinJ.24.2110	45537780234901	170	LinJ.27.0430	1.21667e+16	170	LinJ.33.1790	1.45416e+15
171	LbrM.25.1760	4.65341e+15	171	LbrM.05.1040	1.01734e+16	171	LbrM.35.0270	1.34708e+16	171	LinJ.18.0020	4.4696e+15	171	LinJ.31.0170	1.21435e+16	171	LinJ.33.1800	1.44648e+16
172	LbrM.35.4600	4.65229e+15	172	LbrM.31.1340	1.01603e+16	172	LbrM.28.1700	1.33714e+16	172	LinJ.24.0370	4.41227e+15	172	LinJ.36.3220	1.21197e+16	172	LinJ.35.2710	1.44231e+15
173	LbrM.18.0570	4.64716e+15	173	LbrM.27.0510	1.0152e+16	173	LbrM.26.0050	1.3349e+15	173	LinJ.17.0090	430581948958796	173	LinJ.27.0040	1.21194e+16	173	LinJ.36.2140	1.44033e+16
174	LbrM.27.1690	4.63091e+15	174	LbrM.15.1060	1.00555e+16	174	LbrM.20.0160	1.32298e+16	174	LinJ.21.0060	4.23949e+15	174	LinJ.07.0660	1.21121e+16	174	LinJ.28.1390	1.43781e+15
175	LbrM.34.3230	4.57589e+15	175	LbrM.18.0870	9.96236e+15	175	LbrM.18.0570	1.31784e+16	175	LinJ.25.1210	4.11788e+16	175	LinJ.07.0350	1.20428e+15	175	LinJ.34.2440	1.42192e+16
176	LbrM.35.1270	4.55441e+15	176	LbrM.07.0190	9.95677e+15	176	LbrM.33.1620	1.31606e+16	176	LinJ.32.1110	4.0848e+15	176	LinJ.32.1160	1.19697e+15	176	LinJ.23.1880	1.42162e+16
177	LbrM.16.0570	4.44705e+15	177	LbrM.15.1430	9.85507e+15	177	LbrM.31.0270	1.31195e+16	177	LinJ.27.0860	4.00046e+16	177	LinJ.05.0960	1.19137e+15	177	LinJ.25.0190	1.41902e+16
178	LbrM.32.3230	4.40448e+15	178	LbrM.23.0580	9.78819e+15	178	LbrM.26.2200	1.31008e+16	178	LinJ.36.5160	3.9575e+15	178	LinJ.34.2190	1.18644e+16	178	LinJ.31.0580	1.41691e+16
179	LbrM.35.6900	4.24027e+15	179	LbrM.17.0250	9.77397e+15	179	LbrM.14.1240	1.29454e+16	179	LinJ.22.1210	3.95623e+15	179	LinJ.25.1210	1.18558e+16	179	LinJ.32.1160	1.40662e+16
180	LbrM.18.1180	4.22199e+16	180	LbrM.18.0540	9.69799e+15	180	LbrM.20.3080	1.29058e+15	180	LinJ.21.1820	3925369326422	180	LinJ.35.3130	1.18336e+16	180	LinJ.36.3360	1.39582e+16
181	LbrM.24.2210	4.12402e+15	181	LbrM.14.1490	9.68023e+15	181	LbrM.26.1260	1.25786e+16	181	LinJ.11.0350	384055477012635	181	LinJ.29.0120	1.18005e+16	181	LinJ.33.2210	1.39212e+15
182	LbrM.21.1000	4.09213e+16	182	LbrM.17.1610	9.66697e+15	182	LbrM.27.0050	1.24164e+16	182	LinJ.33.2040	3.7605e+16	182	LinJ.10.0560	1.17796e+16	182	LinJ.28.2100	1.38656e+16
183	LbrM.10.0620	4.03641e+15	183	LbrM.31.1840	9.60445e+15	183	LbrM.35.1270	1.23572e+16	183	LinJ.36.0090	3.74775e+16	183	LinJ.27.1150	1.17334e+15	183	LinJ.27.0920	1.38165e+16
184	LbrM.18.0700	4.02695e+15	184	LbrM.24.2400	9.57824e+15	184	LbrM.29.2470	1.23529e+16	184	LinJ.30.2540	3.7184e+15	184	LinJ.19.1590	1.16895e+16	184	LinJ.29.0250	1.37568e+16
185	LbrM.32.1050	3.97498e+15	185	LbrM.25.1150	951414691168324	185	LbrM.20.2170	1.23009e+16	185	LinJ.15.1270	3.5662e+16	185	LinJ.06.0890	1.16195e+16	185	LinJ.25.0120	1.36738e+16
186	LbrM.31.1340	3.9549e+15	186	LbrM.30.1840	9.45255e+15	186	LbrM.33.3480	1.22897e+16	186	LinJ.28.1240	3.50304e+15	186	LinJ.30.1360	1.15741e+16	186	LinJ.31.1640	1.36415e+15
187	LbrM.33.2590	3.94307e+15	187	LbrM.32.3430	9.44713e+15	187	LbrM.23.0400	1.22441e+15	187	LinJ.10.1250	3.46193e+16	187	LinJ.31.2360	1.15503e+16	187	LinJ.33.2040	1.36342e+16
188	LbrM.29.0900	3.93316e+16	188	LbrM.11.0950	936157342627751	188	LbrM.20.5560	1.22174e+16	188	LinJ.32.2600	3.38276e+15	188	LinJ.15.1430	1.15099e+16	188	LinJ.30.2590	1.35372e+16
189	LbrM.25.1570	3.91138e+16	189	LbrM.06.0830	9.3405e+15	189	LbrM.06.0930	1.22079e+16	189	LinJ.35.3930	3.3436e+15	189	LinJ.15.1010	1.14908e+16	189	LinJ.10.0560	1.32993e+16
190	LbrM.22.1240	3.8974e+15	190	LbrM.30.3610	9.33224e+15	190	LbrM.35.7320	1.21868e+16	190	LinJ.34.3270	3.33646e+16	190	LinJ.12.0730	1.14538e+16	190	LinJ.25.1790	1.31947e+16
191	LbrM.34.0750	3.89063e+16	191	LbrM.18.0570	9.27969e+15	191	LbrM.33.2030	1.21453e+16	191	LinJ.25.2090	3.33412e+15	191	LinJ.11.1200	1.14004e+16	191	LinJ.26.0040	1.31222e+15
192	LbrM.32.2960	3.86713e+16	192	LbrM.17.0330	9.26174e+15	192	LbrM.20.6060	1.21131e+16	192	LinJ.25.0190	3.30252e+16	192	LinJ.36.6680	1.13898e+16	192	LinJ.06.0120	1.30724e+16
193	LbrM.15.0160	3.86296e+15	193	LbrM.32.3380	9.24667e+15	193	LbrM.31.1340	1.20691e+16	193	LinJ.19.0540	3.27939e+15	193	LinJ.23.1880	1.13701e+16	193	LinJ.35.1880	1.30676e+16
194	LbrM.12.0230	3.83719e+16	194	LbrM.17.1410	9.24145e+15	194	LbrM.35.2250	1.20596e+16	194	LinJ.16.0010	3.19325e+15	194	LinJ.31.2680	113651811352962	194	LinJ.06.0760	1.30436e+16
195	LbrM.35.7010	3.82976e+15	195	LbrM.24.2340	9.22605e+15	195	LbrM.11.0850	1.20428e+15	195	LinJ.32.1260	3.18362e+15	195	LinJ.18.0480	1.12352e+15	195	LinJ.29.2420	1.30088e+16
196	LbrM.33.2810	3.72745e+16	196	LbrM.21.0480	9.18184e+15	196	LbrM.28.1580	1.19759e+16	196	LinJ.34.0030	3.18218e+15	196	LinJ.28.2610	1.11977e+16	196	LinJ.04.1250	1.29971e+16
197	LbrM.20.4890	3.68589e+16	197	LbrM.35.6730	9.02775e+15	197	LbrM.20.0470	1.19728e+16	197	LinJ.30.3620	3.15851e+16	197	LinJ.26.0040	1.11605e+16	197	LinJ.30.0170	1.29493e+16
198	LbrM.32.0600	3.63927e+16	198	LbrM.35.0400	9.01037e+15	198	LbrM.32.0530	1.17715e+16	198	LinJ.16.0260	3.12393e+16	198	LinJ.22.0540	1.10092e+15	198	LinJ.28.0550	1.28861e+16
199	LbrM.20.3660	3.5842e+15	199	LbrM.28.2630	8.91033e+15	199	LbrM.30.2420	1.16657e+16	199	LinJ.34.4180	3.11269e+16	199	LinJ.36.0210	1.09643e+16	199	LinJ.19.1480	1.28517e+16
200	LbrM.20.2160	3.54465e+16	200	LbrM.14.0010	8.88849e+15	200	LbrM.27.0310	1.16621e+16	200	LinJ.33.1010	3.06615e+15	200	LinJ.31.1150	1.0932e+16	200	LinJ.33.2880	1.28413e+16
201	LbrM.09.0970	3.53254e+15	201	LbrM.35.4110	8.88065e+15	201	LbrM.19.1790	1.16323e+16	201	LinJ.25.1740	2.98036e+15	201	LinJ.17.0320	1.09132e+16	201	LinJ.34.3460	1.24517e+16
201	LbrM.09.0980	3.53254e+15	202	LbrM.19.1320	885142904475726	202	LbrM.25.0120	1.16267e+16	202	LinJ.29.2420	2.97129e+15	202	LinJ.25.1510	1.0905e+16	202	LinJ.21.0440	1.23815e+16
203	LbrM.20.3970	3.52357e+15	203	LbrM.29.2330	8.76445e+15	203	LbrM.18.0700	1.15605e+16	203	LinJ.31.1650	2.94526e+15	203	LinJ.14.1400	1.08247e+16	203	LinJ.36.7280	1231195938437
204	LbrM.06.1260	3.46117e+16	204	LbrM.25.1310	87539104770261	204	LbrM.09.0450	1.15124e+16	204	LinJ.03.0590	2.93255e+15	204	LinJ.30.0170	1.07429e+15	204	LinJ.04.1170	1.22894e+16
205	LbrM.20.4190	3.31239e+15	205	LbrM.30.2300	8.74615e+15	205	LbrM.31.2950	1.13963e+16	205	LinJ.35.1490	2.81982e+15	205	LinJ.26.2380	1.06386e+16	205	LinJ.30.0650	1.22856e+16
206	LbrM.27.0510	3.28755e+15	206	LbrM.26.0980	8.74342e+15	206	LbrM.21.0440	1.13438e+15	206	LinJ.05.1100	2.77822e+15	206	LinJ.25.0190	1.05744e+16	206	LinJ.30.0760	1.21724e+16
207	LbrM.16.0600	3.26062e+16	207	LbrM.13.0900	8.73054e+15	207	LbrM.10.0640	1.1272e+16	207	LinJ.36.2090	2.76492e+15	207	LinJ.14.0010	1.05649e+16	207	LinJ.27.0430	1.21438e+16
208	LbrM.35.0120	3.22925e+15	208	LbrM.27.1140	8.7294e+15	208	LbrM.07.0190	1.12503e+15	208	LinJ.05.0550	2.75734e+15	208	LinJ.19.1010	1.05514e+16	208	LinJ.11.1050	1.21098e+15
209	LbrM.09.1540	3.22767e+16	209	LbrM.32.3610	8.69284e+15	209	LbrM.30.1010	1.11666e+16	209	LinJ.29.2620	2.72377e+15	209	LinJ.36.4070	1.03159e+16	209	LinJ.35.1310	1.19282e+15
210	LbrM.35.6270	3.22443e+16	210	LbrM.16.1220	8.67522e+15	210	LbrM.30.0710	1.09106e+16	210	LinJ.02.0710	2.67082e+15	210	LinJ.26.2740	1.02982e+16	210	LinJ.35.3130	1.192e+16
211	LbrM.35.1290	322226620137487	211	LbrM.27.1370	8.66807e+15	211	LbrM.33.1830	1.08858e+16	211	LinJ.17.0080	2.64081e+16	211	LinJ.29.2470	1.01523e+16	211	LinJ.35.0840	1.18498e+16
212	LbrM.35.3230	3.22032e+16	212	LbrM.26.0050	8.64942e+15	212	LbrM.15.1100	1.08803e+16	212	LinJ.07.0130	2.62864e+15	212	LinJ.36.2790	1.01289e+16	212	LinJ.16.0590	1.16328e+16
213	LbrM.30.3000	3.2e+15	213	LbrM.20.3660	8.63504e+15	213	LbrM.04.1170	1.08762e+16	213	LinJ.15.1100	2.59778e+16	213	LinJ.36.2870	1.01214e+16	213	LinJ.35.0030	1.1509e+16
214	LbrM.15.0170	3.19796e+16	214	LbrM.18.0230	8.61958e+15	214	LbrM.19.0470	1.07038e+16	214	LinJ.30.0170	2.57478e+15	214	LinJ.36.0340	996779682606587	214	LinJ.31.2360	1.1497e+16
215	LbrM.32.2240	3.05685e+15	215	LbrM.20.2660	861675987553138	215	LbrM.32.1350	1.06438e+15	215	LinJ.03.0040	2.49009e+16	215	LinJ.26.0310	9.94322e+15	215	LinJ.29.2610	1.14663e+16
216	LbrM.34.1150	3.00162e+15	216	LbrM.26.1840	8.61548e+15	216	LbrM.30.0820	1.06316e+16	216	LinJ.36.1320	2.48828e+16	216	LinJ.05.0980	974529037445379	216	LinJ.18.0780	1.13868e+16
217	LbrM.26.2670	2.98437e+16	217	LbrM.33.2370	850728989064332	217	LbrM.34.1800	1.05457e+15	217	LinJ.33.1660	2.47322e+16	217	LinJ.17.1350	9.72332e+15	217	LinJ.30.1360	1.12819e+15
218	LbrM.33.2100	2.97288e+15	218	LbrM.29.0250	8.462e+15	218	LbrM.20.3260	1.03247e+16	218	LinJ.32.1910	2.4328e+16	218	LinJ.13.1000	9.68557e+15	218	LinJ.36.2870	1.12801e+15
219	LbrM.32.1200	2.96287e+15	219	LbrM.32.1750	841470512760834	219	LbrM.11.0490	1.03218e+16	219	LinJ.22.0440	2.40646e+16	219	LinJ.16.0550	9.64284e+15	219	LinJ.30.0470	1.12335e+15
220	LbrM.29.2140	2.95413e+16	220	LbrM.18.0830	838388300597672	220	LbrM.18.0870	1.02565e+15	220	LinJ.31.3050	2.31532e+16	220	LinJ.30.2360	9.49164e+15	220	LinJ.15.1490	1.12256e+16
221	LbrM.34.0150	2.92742e+16	221	LbrM.17.0910	8.29517e+15	221	LbrM.30.2550	1.02532e+16	221	LinJ.36.3150	2.30074e+16	221	LinJ.06.0760	948900459443072	221	LinJ.23.0300	1.12097e+16
222	LbrM.20.2830	2.92555e+16	222	LbrM.30.3000	8.28256e+15	222	LbrM.33.3020	1.02423e+16	222	LinJ.10.0960	2.26531e+16	222	LinJ.18.0210	948752524720734	222	LinJ.31.0170	1.1203e+16
223	LbrM.23.1330	2.88869e+16	223	LbrM.23.1720	8.24832e+15	223	LbrM.32.3380	1.0229e+16	223	LinJ.33.2670	2.25742e+16	223	LinJ.31.1660	946445248513049	223	LinJ.32.3340	1.11986e+15
224	LbrM.28.2010	2.88524e+15	224	LbrM.35.2180	8.21805e+15	224	LbrM.35.4110	1.01849e+16	224	LinJ.07.0610	2.22769e+16	224	LinJ.16.1230	9.42816e+15	224	LinJ.21.0300	1.11827e+16
225	LbrM.34.0170	2.82722e+15	225	LbrM.35.2870	8.20635e+15	225	LbrM.20.3660	1.01521e+16	225	LinJ.35.1310	2.18921e+16	225	LinJ.32.3110	9.42257e+15	225	LinJ.27.0040	1.11813e+16
226	LbrM.35.2500	2.8039e+15	226	LbrM.24.2330	8.17927e+15	226	LbrM.14.1490	1.01456e+16	226	LinJ.24.1570	2.18794e+16	226	LinJ.18.0510	940501242496596	226	LinJ.11.0710	1.10341e+16
227	LbrM.16.0750	2.79256e+15	227	LbrM.35.5370	8.09655e+15	227	LbrM.30.0540	1.01305e+16	227	LinJ.16.0930	2.13648e+16	227	LinJ.26.1920	928387413816867	227	LinJ.06.1330	1.09772e+15
228	LbrM.31.2760	2.777e+16	228	LbrM.24.2360	8.083e+15	228	LbrM.13.1540	1.00695e+15	228	LinJ.35.4350	2.12867e+16	228	LinJ.21.0740	9.28042e+15	228	LinJ.28.2970	1.09168e+16
229	LbrM.24.2110	277279193029193	229	LbrM.32.0100	8.07541e+15	229	LbrM.17.1610	1.00391e+16	229	LinJ.21.2070	2.11461e+16	229	LinJ.36.5350	9.24948e+15	229	LinJ.05.1040	1.08859e+16
230	LbrM.31.2470	2.76584e+15	230	LbrM.35.2900	8.06621e+15	230	LbrM.31.2560	9.98643e+15	230	LinJ.10.1260	2.08783e+16	230	LinJ.30.1770	9.16982e+15	230	LinJ.22.1110	1.08716e+15
231	LbrM.33.1740	2.75205e+15	231	LbrM.27.0310	8.0434e+15	231	LbrM.23.0580	9.95004e+15	231	LinJ.21.0070	2.03776e+16	231	LinJ.27.0310	9.16758e+15	231	LinJ.21.0890	1.08168e+15
232	LbrM.05.0770	2.7292e+15	232	LbrM.30.0670	800178493474753	232	LbrM.15.1380	9.9192e+15	232	LinJ.23.0820	1.99552e+16	232	LinJ.28.2820	9.15595e+15	232	LinJ.35.2150	1.08077e+15
233	LbrM.21.0060	2.69261e+15	233	LbrM.29.1350	7.89345e+15	233	LbrM.18.0290	9.89579e+15	233	LinJ.35.1720	1.96546e+16	233	LinJ.32.3280	9.15253e+15	233	LinJ.21.1820	1.08017e+16
234	LbrM.03.0060	2.65884e+16	234	LbrM.34.2040	7.86299e+15	234	LbrM.32.1150	9.88441e+15	234	LinJ.32.2540	194.0	234	LinJ.34.4140	9.11412e+15	234	LinJ.36.0340	1.08014e+16
235	LbrM.08.0350	2.65132e+15	235	LbrM.28.2830	7.84566e+16	235	LbrM.17.1410	9.55778e+15	235	LinJ.35.0130	1.93454e+16	235	LinJ.24.2350	9.10531e+15	235	LinJ.25.1510	1.07294e+16
236	LbrM.20.5180	2.63799e+16	236	LbrM.20.1840	7.8242e+15	236	LbrM.32.2880	9.53997e+15	236	LinJ.25.0990	1.93309e+15	236	LinJ.25.1460	9.07769e+15	236	LinJ.19.1590	1.07104e+16
237	LbrM.21.0950	2.63031e+15	237	LbrM.02.0650	7.81036e+15	237	LbrM.24.2340	9.46254e+15	237	LinJ.33.0360	1.91832e+15	237	LinJ.34.4330	9.06135e+15	237	LinJ.14.0010	1.07053e+16
238	LbrM.35.1390	2.57073e+15	238	LbrM.29.0150	7.69535e+15	238	LbrM.15.1430	9.45386e+15	238	LinJ.21.0960	1.91713e+16	238	LinJ.32.0050	9.04082e+15	238	LinJ.36.4180	1.06869e+16
239	LbrM.23.0370	2.5498e+16	239	LbrM.04.1170	7.64695e+15	239	LbrM.26.0980	943569356708715	239	LinJ.31.3280	1.90826e+16	239	LinJ.26.0940	9.0077e+15	239	LinJ.30.2360	1.06135e+16
240	LbrM.34.2630	2.52929e+16	240	LbrM.05.1200	7.60651e+15	240	LbrM.24.2400	9.25598e+15	240	LinJ.36.3160	1.89545e+15	240	LinJ.28.2970	8.99606e+15	240	LinJ.15.1430	1.04924e+16
241	LbrM.29.1160	2.49937e+16	241	LbrM.33.1620	7.60082e+15	241	LbrM.29.0250	9.20147e+15	241	LinJ.25.0580	1.87561e+16	241	LinJ.34.2110	8.99363e+15	241	LinJ.26.2380	103532360797998
242	LbrM.23.0540	2.48203e+16	242	LbrM.11.0760	7.59501e+15	242	LbrM.24.2330	9.16561e+15	242	LinJ.13.0220	1.87413e+16	242	LinJ.30.3050	8.96676e+15	242	LinJ.29.0120	103359151648746
243	LbrM.20.3610	244574676486624	243	LbrM.20.3930	7.59307e+15	243	LbrM.18.0230	914453331855048	243	LinJ.24.0870	1.87296e+16	243	LinJ.24.2340	8.84608e+15	243	LinJ.18.0630	1.0314e+15
244	LbrM.07.0620	2.39202e+15	244	LbrM.34.1340	7.55465e+15	244	LbrM.30.2680	9.13231e+15	244	LinJ.36.5630	1.86311e+15	244	LinJ.35.3670	882262066570867	244	LinJ.35.3670	1.0256e+16
245	LbrM.31.2550	2.38847e+16	245	LbrM.26.1640	7.55149e+15	245	LbrM.29.2330	9.11745e+15	245	LinJ.01.0500	1.85604e+15	245	LinJ.33.1430	8.73659e+15	245	LinJ.19.1560	1.02244e+16
246	LbrM.32.2010	2.36144e+16	246	LbrM.08.0010	7.51211e+15	246	LbrM.25.0200	9.05144e+15	246	LinJ.36.2380	1.85037e+16	246	LinJ.35.0710	8.72128e+15	246	LinJ.12.0730	1.02235e+16
247	LbrM.25.2180	2.35278e+16	247	LbrM.05.0980	7.50851e+15	247	LbrM.30.2300	9.04811e+15	247	LinJ.16.0240	1.82128e+16	247	LinJ.17.1580	8.72085e+15	247	LinJ.36.4070	1.01446e+16
248	LbrM.34.4810	2.32752e+16	248	LbrM.25.1330	746531306171419	248	LbrM.25.1150	8.99796e+15	248	LinJ.06.0140	1.82038e+16	248	LinJ.05.1200	8.71359e+15	248	LinJ.33.1430	1.01164e+16
249	LbrM.25.1100	2.29812e+16	249	LbrM.18.0290	7.4568e+16	249	LbrM.19.1320	8.93488e+15	249	LinJ.04.1170	1.81288e+16	249	LinJ.32.1660	87106640116797	249	LinJ.18.0210	1.00611e+15
250	LbrM.28.1700	2.27951e+16	250	LbrM.04.0030	7.4348e+15	250	LbrM.16.0750	8.86368e+15	250	LinJ.16.0540	1.81106e+16	250	LinJ.30.0800	866347087667478	250	LinJ.10.0940	1.00542e+15
251	LbrM.22.1170	2.25982e+16	251	LbrM.35.3220	7.34091e+15	251	LbrM.26.1840	8.86219e+15	251	LinJ.32.0600	1.78535e+16	251	LinJ.02.0640	8.64334e+15	251	LinJ.18.0020	1.0044e+16
252	LbrM.19.0670	2.22431e+16	252	LbrM.34.1490	7.31648e+15	252	LbrM.25.1310	882338597950483	252	LinJ.29.1190	1.78463e+15	252	LinJ.04.1170	8.58386e+15	252	LinJ.33.0530	9.78887e+15
253	LbrM.20.4140	2.21444e+16	253	LbrM.16.0150	7.26562e+15	253	LbrM.15.0990	8.82026e+15	253	LinJ.35.3280	1.78116e+16	253	LinJ.28.1940	857534099512266	253	LinJ.36.2070	978565512382366
254	LbrM.05.0030	2.17123e+16	254	LbrM.29.0850	7.08639e+16	254	LbrM.31.1820	8.75434e+15	254	LinJ.20.0630	1.77725e+16	254	LinJ.11.1100	856499690450649	254	LinJ.36.6680	9.78067e+15
255	LbrM.16.1090	2.16788e+16	255	LbrM.28.3140	7.06787e+16	255	LbrM.07.0660	874997261628156	255	LinJ.36.2070	1.74046e+16	255	LinJ.36.2070	8.54564e+15	255	LinJ.15.1010	9.74133e+15
256	LbrM.34.5080	2.14987e+15	256	LbrM.35.6230	7.06591e+15	256	LbrM.02.0650	8.69882e+15	256	LinJ.28.2100	1.69951e+15	256	LinJ.30.0610	8.47731e+15	256	LinJ.36.5630	9.64343e+15
257	LbrM.21.1700	2.12598e+16	257	LbrM.34.5210	7.06585e+15	257	LbrM.33.2370	8.67218e+15	257	LinJ.11.0240	1.6626e+15	257	LinJ.11.0960	847444969444926	257	LinJ.19.1010	9.62687e+15
258	LbrM.28.1100	2.10852e+15	258	LbrM.14.1240	7062.0	258	LbrM.28.2170	8.65511e+15	258	LinJ.13.1460	1.6539e+16	258	LinJ.15.1080	8.43757e+15	258	LinJ.30.0610	9.62455e+15
259	LbrM.32.0300	208.0	259	LbrM.20.3070	7.06e+15	259	LbrM.32.3060	8.65245e+15	259	LinJ.22.0010	1.61663e+16	259	LinJ.34.4120	8.40254e+15	259	LinJ.24.2340	960854529222195
260	LbrM.22.0560	2.07078e+16	260	LbrM.13.1220	7060.0	260	LbrM.04.0880	8.63267e+15	260	LinJ.05.0030	1.58653e+16	260	LinJ.36.3170	8.37316e+15	260	LinJ.26.1550	957700286526409
261	LbrM.24.0780	2.03626e+16	261	LbrM.28.1990	7.05009e+15	261	LbrM.14.0010	860434607706342	261	LinJ.21.2050	1.58451e+16	261	LinJ.24.2370	8.32137e+15	261	LinJ.21.0310	9.5748e+15
262	LbrM.35.1750	2.02607e+16	262	LbrM.27.0820	6.97704e+15	262	LbrM.20.2660	8.60049e+15	262	LinJ.18.0450	1.5805e+16	262	LinJ.30.3640	8.29399e+15	262	LinJ.36.2790	9.57052e+15
263	LbrM.34.1650	1.9958e+16	263	LbrM.24.2210	6.93783e+15	263	LbrM.15.0970	857405563740638	263	LinJ.22.0013	1.57431e+16	263	LinJ.27.0590	8.12941e+15	263	LinJ.31.1150	9.51971e+15
264	LbrM.07.0190	1.95473e+15	264	LbrM.35.3430	6.92682e+15	264	LbrM.32.3430	8.56711e+15	264	LinJ.33.1690	1.57069e+16	264	LinJ.04.0010	8.09986e+15	264	LinJ.02.0640	9.47157e+15
265	LbrM.28.2270	1.90865e+16	265	LbrM.19.1820	6.91608e+16	265	LbrM.35.4000	854078772950022	265	LinJ.12.0190	1.54382e+16	265	LinJ.24.2110	8.08228e+15	265	LinJ.35.1700	942218209680963
266	LbrM.15.1190	1.89802e+16	266	LbrM.16.1450	6.85458e+15	266	LbrM.17.0250	8.53242e+15	266	LinJ.36.4690	1.52644e+16	266	LinJ.33.1770	8.03936e+15	266	LinJ.35.3280	9.36009e+15
267	LbrM.31.3240	1.88571e+16	267	LbrM.19.0210	6.77572e+15	267	LbrM.21.0990	8.48118e+15	267	LinJ.03.0690	1.52027e+16	267	LinJ.11.0700	8.02873e+15	267	LinJ.26.0940	935021040577541
268	LbrM.18.0170	1.84826e+16	268	LbrM.33.3000	6.75276e+15	268	LbrM.26.1640	8.45645e+15	268	LinJ.30.1880	1.51218e+16	268	LinJ.34.3860	8.02633e+15	268	LinJ.17.1350	934384690204687
269	LbrM.13.0080	1.84338e+16	269	LbrM.01.0740	6.72881e+15	269	LbrM.06.0830	8.33785e+15	269	LinJ.27.2500	1.50228e+16	269	LinJ.32.1110	7.93029e+15	269	LinJ.01.0800	9.28139e+15
270	LbrM.35.2250	1.8355e+15	270	LbrM.30.3480	6.72836e+15	270	LbrM.33.0520	8.32355e+15	270	LinJ.36.0340	1.47299e+16	270	LinJ.18.0270	7.86159e+15	270	LinJ.32.3280	9.2419e+15
271	LbrM.24.0790	1.81906e+16	271	LbrM.32.1150	6.71156e+15	271	LbrM.21.1700	8.29965e+15	271	LinJ.07.0420	1.47253e+16	271	LinJ.35.2150	7.84188e+15	271	LinJ.15.1270	9.22195e+15
272	LbrM.16.1590	1.77596e+15	272	LbrM.15.1230	6.67667e+15	272	LbrM.15.1080	8.25457e+15	272	LinJ.17.1510	146.0	272	LinJ.26.1600	7.83975e+15	272	LinJ.28.2820	9.16403e+15
273	LbrM.35.0660	1.77581e+16	273	LbrM.30.2980	6.64459e+16	273	LbrM.13.0900	8.16056e+15	273	LinJ.28.0730	1.45254e+16	273	LinJ.21.0610	7.75263e+15	273	LinJ.34.4330	9.1191e+15
274	LbrM.32.1100	1.77306e+15	274	LbrM.35.6760	6.64445e+15	274	LbrM.04.0030	8.12225e+15	274	LinJ.21.1320	1.45032e+16	274	LinJ.36.3040	7.70051e+15	274	LinJ.25.1430	9.10672e+15
275	LbrM.26.0350	1.76407e+15	275	LbrM.25.2050	6.60391e+15	275	LbrM.24.2360	8.10049e+16	275	LinJ.21.0730	143100533788464	275	LinJ.36.6190	7.68574e+15	275	LinJ.27.1150	9.10647e+15
276	LbrM.17.1530	1.75993e+15	276	LbrM.33.0520	657092259458818	276	LbrM.35.2870	8.07665e+15	276	LinJ.22.0220	1.41531e+15	276	LinJ.35.5240	7.68567e+15	276	LinJ.07.0660	9.08852e+15
277	LbrM.26.2640	1.74298e+16	277	LbrM.26.2200	6.52628e+15	277	LbrM.34.1490	8.07004e+15	277	LinJ.05.1140	1.41228e+16	277	LinJ.28.3160	7.68563e+15	277	LinJ.26.1920	9.08046e+15
278	LbrM.25.0190	1.7195e+16	278	LbrM.24.2110	6.47356e+15	278	LbrM.05.1040	8.04717e+15	278	LinJ.32.1130	1.36445e+16	278	LinJ.27.1770	7.68376e+15	278	LinJ.04.0680	9.0735e+15
279	LbrM.22.1020	1.71607e+16	279	LbrM.17.0340	6.43277e+15	279	LbrM.18.0830	8.02575e+16	279	LinJ.30.3430	1.36317e+16	279	LinJ.36.0770	7682.0	279	LinJ.34.4140	9.04433e+15
280	LbrM.32.2870	1.70085e+16	280	LbrM.14.0460	6.40946e+15	280	LbrM.34.1220	8.02091e+15	280	LinJ.35.4910	1.35038e+16	279	LinJ.34.1570	7682.0	280	LinJ.21.0980	89791134072712
281	LbrM.33.1500	1.70079e+16	281	LbrM.35.1270	6.38168e+15	281	LbrM.32.0600	7.99089e+15	281	LinJ.31.0110	1338884101245	281	LinJ.36.0110	7680.0	281	LinJ.34.0950	8.97017e+15
282	LbrM.19.0080	1.68237e+16	282	LbrM.28.2600	6.38095e+15	282	LbrM.13.1220	798584076634104	282	LinJ.32.3520	1.32747e+15	281	LinJ.13.1500	7680.0	282	LinJ.24.2350	891391126152884
283	LbrM.20.0510	1.65923e+16	283	LbrM.34.1000	6.38088e+15	283	LbrM.34.1340	7.95011e+15	283	LinJ.03.0520	1.32518e+16	281	LinJ.28.2370	7680.0	283	LinJ.17.0320	8.903e+15
284	LbrM.17.1270	1.64035e+16	284	LbrM.26.2640	6.27259e+15	284	LbrM.19.1750	7.94805e+15	284	LinJ.06.0290	1.31968e+16	284	LinJ.34.3270	7.68e+15	284	LinJ.11.1100	8.89931e+15
285	LbrM.20.1830	1.61783e+16	285	LbrM.27.1580	6.25908e+15	285	LbrM.28.3140	7.94411e+15	285	LinJ.33.2430	1.31085e+16	285	LinJ.23.0880	767781727215593	285	LinJ.27.0310	8.82403e+15
286	LbrM.35.0400	1.6155e+16	286	LbrM.18.0110	6.22522e+16	286	LbrM.35.6230	7.94135e+15	286	LinJ.10.0940	1.29895e+16	286	LinJ.30.3490	7.65644e+15	286	LinJ.36.6190	882261168837615
287	LbrM.26.2200	1.60194e+16	287	LbrM.31.0170	6.21093e+15	287	LbrM.20.3070	7.936e+15	287	LinJ.34.2430	1.27254e+16	287	LinJ.36.3360	7.60372e+15	287	LinJ.18.0510	8.81034e+15
288	LbrM.34.3010	159661813118552	288	LbrM.11.0700	6.17947e+15	288	LbrM.32.0300	7936.0	288	LinJ.20.0720	1.25598e+16	288	LinJ.16.1710	7.59217e+15	288	LinJ.32.0050	8.79779e+15
289	LbrM.19.0470	1.58769e+16	289	LbrM.31.1820	6.1745e+15	289	LbrM.17.0910	7.89866e+15	289	LinJ.23.0550	1.25538e+16	289	LinJ.16.0150	7.58446e+15	289	LinJ.13.1000	8.77558e+15
290	LbrM.32.2030	1.53111e+16	290	LbrM.28.0540	6.1696e+15	290	LbrM.31.1840	7.84753e+15	290	LinJ.23.1050	1.25368e+16	290	LinJ.28.2210	7.57894e+15	290	LinJ.30.0800	8.759e+15
291	LbrM.14.1040	1.48891e+16	291	LbrM.20.3950	6.16874e+15	291	LbrM.35.3220	7.80965e+15	291	LinJ.36.5400	1.25181e+16	291	LinJ.35.1430	7.43562e+15	291	LinJ.34.4390	8.73902e+15
292	LbrM.20.0110	1.48033e+16	292	LbrM.16.0560	6.13851e+15	292	LbrM.20.3470	7.78847e+15	292	LinJ.30.2480	1.24701e+16	292	LinJ.34.1900	7.41239e+16	292	LinJ.04.0010	8.71483e+15
293	LbrM.26.2160	1.46746e+15	293	LbrM.21.0990	6.12492e+15	293	LbrM.08.0010	776524377861787	293	LinJ.36.3750	1.22021e+15	293	LinJ.17.0410	7.38432e+15	293	LinJ.30.1770	8.7117e+15
294	LbrM.09.0070	1.45876e+15	294	LbrM.30.3290	6.07426e+15	294	LbrM.05.1200	7.72484e+15	294	LinJ.36.0600	1.21634e+16	294	LinJ.24.2220	7.34587e+15	294	LinJ.26.0310	8.70211e+15
295	LbrM.32.1150	1.42521e+16	295	LbrM.28.3070	6.0694e+15	295	LbrM.11.0760	7.70756e+15	295	LinJ.05.0830	1.19202e+16	295	LinJ.33.2860	731917699376241	295	LinJ.26.1600	8.69878e+15
296	LbrM.29.0450	1.40964e+16	296	LbrM.21.1410	5.92847e+15	296	LbrM.34.1610	7.70686e+15	296	LinJ.18.1090	1.17773e+15	296	LinJ.35.1200	730557368381385	296	LinJ.13.1500	8.67298e+15
297	LbrM.29.0940	1.40925e+16	297	LbrM.20.1640	5.92802e+16	297	LbrM.20.0050	7.66219e+15	297	LinJ.33.0350	1.16265e+16	297	LinJ.27.1350	7.19221e+15	297	LinJ.34.1570	8.64176e+15
298	LbrM.20.0060	1.39425e+16	298	LbrM.20.0330	5.92719e+15	298	LbrM.27.1140	7.65253e+15	298	LinJ.07.0060	1.14855e+16	298	LinJ.36.3150	7.1594e+15	298	LinJ.33.1770	8.58251e+15
299	LbrM.33.1880	1.39234e+16	299	LbrM.13.1540	5.91717e+15	299	LbrM.35.6730	7.63951e+15	299	LinJ.20.0120	1.14441e+16	299	LinJ.36.1200	7.15862e+15	299	LinJ.34.3270	858196821309118
300	LbrM.32.1130	1.38191e+16	300	LbrM.30.1010	5.91336e+15	300	LbrM.20.3950	7.60947e+15	300	LinJ.29.1250	1.13758e+16	300	LinJ.30.0940	7.14734e+15	300	LinJ.23.0570	855266428222304
301	LbrM.22.0120	1.37595e+16	301	LbrM.32.1840	590602615529458	301	LbrM.32.0100	7.6036e+15	301	LinJ.32.3830	1.13633e+16	301	LinJ.01.0670	7.12397e+15	301	LinJ.21.0610	8.52135e+15
302	LbrM.30.2420	1.36629e+15	302	LbrM.35.3240	5.89974e+15	302	LbrM.28.2830	7.59682e+15	302	LinJ.34.0510	1.12833e+16	302	LinJ.07.1320	7.1151e+15	302	LinJ.17.1580	8.48845e+15
303	LbrM.28.2620	1.35251e+16	303	LbrM.23.0800	5.88031e+16	303	LbrM.26.0200	7.54872e+15	303	LinJ.36.4570	1.12659e+16	303	LinJ.29.1360	7.1079e+16	303	LinJ.36.3170	8.47861e+15
304	LbrM.29.0100	1.34289e+16	304	LbrM.20.3010	5.84664e+15	304	LbrM.31.3310	754463917197783	304	LinJ.08.0310	1.11977e+16	304	LinJ.26.2290	7.09322e+15	304	LinJ.16.1230	8.47757e+15
305	LbrM.06.1050	1.32984e+15	305	LbrM.16.1670	5.80835e+15	305	LbrM.17.0610	7.42719e+16	305	LinJ.06.1210	1.10018e+16	305	LinJ.36.2850	7.06297e+15	305	LinJ.36.3040	8.47221e+15
306	LbrM.28.0710	1.30922e+15	306	LbrM.18.0760	5.77569e+15	306	LbrM.32.2010	7.4069e+15	306	LinJ.25.1360	101.6	306	LinJ.36.6710	7.0151e+15	306	LinJ.28.2610	8.46085e+15
307	LbrM.20.1620	1.29895e+16	307	LbrM.21.0840	5.76163e+15	307	LbrM.35.2900	7.34326e+15	307	LinJ.31.0220	1.01407e+16	307	LinJ.14.0460	7.01355e+15	307	LinJ.28.3160	845955384596595
308	LbrM.29.2640	1.28279e+16	308	LbrM.15.0990	5.75121e+15	308	LbrM.19.0210	7.23916e+15	308	LinJ.32.3040	1.00854e+16	308	LinJ.15.1310	7.00949e+15	308	LinJ.35.5240	8.45886e+15
309	LbrM.04.0530	1.28258e+15	309	LbrM.20.3380	5.68195e+15	309	LbrM.25.0190	7.23261e+15	309	LinJ.35.3590	97.0	309	LinJ.13.1290	6.99807e+15	309	LinJ.09.0970	8.45877e+15
310	LbrM.34.3660	1.26613e+16	310	LbrM.32.3550	5.68124e+15	310	LbrM.20.3930	7.22369e+15	310	LinJ.26.2730	9.28756e+15	310	LinJ.28.2570	6.98838e+16	310	LinJ.27.1770	8.45501e+15
311	LbrM.33.1800	1.26228e+16	311	LbrM.23.1420	5.67371e+16	311	LbrM.26.2150	7.20097e+15	311	LinJ.24.1560	9.0899e+15	311	LinJ.18.0090	6.95554e+15	311	LinJ.36.0770	8454.0
312	LbrM.35.3640	1.25363e+16	312	LbrM.28.1700	5.62231e+15	312	LbrM.28.1990	7.19819e+15	312	LinJ.01.0110	8.85335e+15	312	LinJ.23.1560	6.95283e+15	312	LinJ.28.2370	8452.0
313	LbrM.30.2810	1.24864e+16	313	LbrM.28.1340	5.57201e+15	313	LbrM.29.2640	7.13696e+15	313	LinJ.33.1940	8.84111e+15	313	LinJ.35.0320	6.9324e+15	312	LinJ.36.0110	8452.0
314	LbrM.21.0700	1.23385e+16	314	LbrM.02.0400	5.57196e+15	314	LbrM.35.0660	7.1201e+15	314	LinJ.12.0200	8.72617e+15	314	LinJ.28.2100	6.89452e+16	314	LinJ.28.3090	8.39082e+15
315	LbrM.27.2460	1.23071e+16	315	LbrM.30.1480	5.54254e+15	315	LbrM.34.2300	7.1054e+15	315	LinJ.27.0980	8.57155e+15	315	LinJ.15.1550	6.88275e+15	315	LinJ.25.1460	8.36596e+15
316	LbrM.30.1370	1.18884e+16	316	LbrM.34.0360	5.53792e+15	316	LbrM.08.0900	7.0906e+15	316	LinJ.35.2400	8.55996e+15	316	LinJ.28.3090	6.86658e+16	316	LinJ.18.0270	8.34288e+15
317	LbrM.30.2740	1.17929e+16	317	LbrM.34.3840	5.51523e+15	317	LbrM.26.0350	7.05484e+15	317	LinJ.22.0600	8.55581e+15	317	LinJ.27.1230	68548283944072	317	LinJ.36.0210	8.2867e+15
318	LbrM.14.0130	1.17713e+15	318	LbrM.30.1420	5.47994e+15	318	LbrM.27.1370	7.04177e+15	318	LinJ.18.0200	8.53881e+15	318	LinJ.34.4390	6.82059e+16	318	LinJ.28.1940	8.2742e+15
319	LbrM.29.2480	1.17671e+16	319	LbrM.34.0110	5.42877e+15	319	LbrM.35.2180	7.02887e+15	319	LinJ.35.3730	8.51174e+15	319	LinJ.11.0900	6.8172e+15	319	LinJ.34.4120	822940966697897
320	LbrM.30.1330	1.17505e+16	320	LbrM.35.3800	5.40535e+15	320	LbrM.20.1840	70091233038942	320	LinJ.35.5450	849475642764785	320	LinJ.16.1470	6.80612e+15	320	LinJ.05.1200	8.16494e+15
321	LbrM.04.0630	1.16738e+16	321	LbrM.21.0700	5.26425e+15	321	LbrM.21.0310	7.00132e+15	321	LinJ.29.0950	8.46179e+15	321	LinJ.30.3300	6.78557e+15	321	LinJ.24.2370	8.13818e+15
322	LbrM.08.0340	1.16704e+16	322	LbrM.13.0760	5.26306e+15	322	LbrM.29.0850	6.94907e+15	322	LinJ.36.1410	8.3733e+15	322	LinJ.28.0550	6.69119e+15	322	LinJ.30.3050	8.1274e+15
323	LbrM.19.1220	1.15008e+16	323	LbrM.27.2750	5.25152e+15	323	LbrM.29.1350	6.92681e+15	323	LinJ.16.0550	8.25714e+15	323	LinJ.17.0300	6.68243e+15	323	LinJ.35.1200	8.09255e+15
324	LbrM.35.5420	1.14348e+16	324	LbrM.04.1250	5.24668e+15	324	LbrM.27.2510	6.88827e+15	324	LinJ.32.0470	8.21311e+15	324	LinJ.21.0980	6.68158e+15	324	LinJ.35.1490	8.01758e+16
325	LbrM.28.0840	1.13576e+16	325	LbrM.17.0790	5.23923e+15	325	LbrM.29.0150	6.87231e+15	325	LinJ.28.0550	7.96281e+15	325	LinJ.21.1450	6.62977e+15	325	LinJ.34.3030	8.00244e+16
326	LbrM.29.0510	1.13083e+15	326	LbrM.28.0340	5.23388e+15	326	LbrM.30.3290	6.86754e+15	326	LinJ.32.1010	7.94813e+15	326	LinJ.31.1640	6.61363e+15	326	LinJ.29.2470	7.87592e+15
327	LbrM.26.2680	1.13061e+16	327	LbrM.27.2230	5.2238e+15	327	LbrM.32.1100	6.84584e+15	327	LinJ.34.1660	7.93235e+15	327	LinJ.33.0530	6.59637e+15	327	LinJ.15.1550	7.86651e+15
328	LbrM.20.0160	113.0	328	LbrM.35.3390	5.211e+15	328	LbrM.14.0460	6.84157e+15	328	LinJ.30.0800	7.88849e+15	328	LinJ.13.1420	6.59212e+15	328	LinJ.35.1430	7.84137e+15
329	LbrM.35.6420	1.12531e+16	329	LbrM.20.2480	5.19847e+15	329	LbrM.32.3550	6.84089e+15	329	LinJ.21.0980	7.78961e+15	329	LinJ.32.3520	6.50718e+15	329	LinJ.36.3750	7.81527e+15
330	LbrM.05.0800	111485949563605	330	LbrM.33.2210	5.1895e+15	330	LbrM.16.0150	6.83043e+15	330	LinJ.36.6220	7.75722e+15	330	LinJ.35.0070	6.45642e+15	330	LinJ.11.1000	7.79533e+15
331	LbrM.28.1220	1.10495e+16	331	LbrM.31.0010	5.17861e+15	331	LbrM.28.2600	6.82547e+15	331	LinJ.28.2950	7.71332e+15	331	LinJ.33.2040	6.45276e+15	331	LinJ.05.1140	7.76149e+15
332	LbrM.20.0030	1.10183e+16	332	LbrM.27.1360	516363703664629	332	LbrM.10.0620	6.82299e+15	332	LinJ.23.1880	7.68286e+15	332	LinJ.16.0580	6.44001e+15	332	LinJ.34.2110	7.74728e+15
333	LbrM.04.1140	1.09467e+16	333	LbrM.19.0280	5.12283e+16	333	LbrM.35.6760	6.80166e+15	333	LinJ.33.1040	7.63626e+15	333	LinJ.32.1750	6.438e+15	333	LinJ.13.1290	7.722e+15
334	LbrM.34.3990	1.09445e+16	334	LbrM.35.2520	5.11943e+15	334	LbrM.21.0700	6.79977e+15	334	LinJ.03.0120	7.59324e+15	334	LinJ.28.1350	6.40423e+15	334	LinJ.23.0880	7.71612e+15
335	LbrM.34.2300	1.08511e+16	335	LbrM.20.0060	5.11593e+15	335	LbrM.33.3000	6.78231e+15	335	LinJ.32.2160	7.51295e+15	335	LinJ.20.0060	6.3862e+15	335	LinJ.05.0980	7.60745e+16
336	LbrM.09.0170	1.08439e+16	336	LbrM.34.2300	511241720247852	336	LbrM.27.2760	6.77168e+15	336	LinJ.15.1540	7.45732e+15	336	LinJ.29.0140	6.35915e+15	336	LinJ.35.0710	7.59157e+15
337	LbrM.28.2970	1.0701e+16	337	LbrM.34.0690	511124177336673	337	LbrM.17.0340	6.68607e+15	337	LinJ.28.1960	7.39782e+15	337	LinJ.29.1680	6.33078e+15	337	LinJ.28.1660	7.48103e+15
338	LbrM.16.0550	1.06011e+16	338	LbrM.20.5850	5.06507e+15	338	LbrM.28.2630	6.67806e+15	338	LinJ.34.4020	7.3749e+15	338	LinJ.17.0400	6.32694e+15	338	LinJ.32.3520	7.4779e+15
339	LbrM.10.1280	106.0	339	LbrM.27.1450	5.0241e+15	339	LbrM.20.3010	6.67767e+15	339	LinJ.32.1160	7.35774e+15	339	LinJ.29.0860	6.21486e+15	339	LinJ.28.3060	7.46841e+15
339	LbrM.01.0170	106.0	340	LbrM.34.1610	5.02126e+15	340	LbrM.16.1450	6.66594e+16	340	LinJ.33.2700	7.26804e+15	340	LinJ.21.0840	6.19716e+15	340	LinJ.31.1660	7.46659e+15
339	LbrM.22.1310	106.0	341	LbrM.06.0850	5.00378e+15	341	LbrM.15.1230	6.65532e+15	341	LinJ.27.0190	7.21516e+15	341	LinJ.29.1900	6.18414e+15	341	LinJ.35.2400	7.43935e+15
342	LbrM.33.1110	1.04949e+16	342	LbrM.35.0660	4.97459e+15	342	LbrM.06.0850	6.56394e+15	342	LinJ.29.0860	699998599439776	342	LinJ.34.0120	6.1518e+15	342	LinJ.32.3110	7.35665e+15
343	LbrM.33.2820	104.0	343	LbrM.32.3560	4.96753e+15	343	LbrM.18.0110	6.49403e+15	343	LinJ.08.0330	6.99808e+15	343	LinJ.36.3190	6.11078e+15	343	LinJ.36.6710	7.31397e+15
344	LbrM.15.1480	1.03807e+16	344	LbrM.30.2420	4.96635e+15	344	LbrM.19.1710	6.44471e+15	344	LinJ.30.2380	6.95233e+15	344	LinJ.34.3210	6.10555e+15	344	LinJ.27.0590	7.27861e+16
345	LbrM.18.1610	1.02609e+16	345	LbrM.31.3340	4.95797e+15	345	LbrM.27.2210	6.43062e+15	345	LinJ.30.2990	682424304204445	345	LinJ.17.0870	6.0895e+15	345	LinJ.36.2130	7.27081e+15
346	LbrM.20.4010	1.00634e+16	346	LbrM.34.0810	4.91021e+15	346	LbrM.18.0620	6.39457e+15	346	LinJ.33.1150	681997476679949	346	LinJ.36.1730	6.08508e+15	346	LinJ.31.3050	7.25721e+15
347	LbrM.15.0990	9.91651e+15	347	LbrM.08.0590	4.81647e+15	347	LbrM.16.1220	6.38696e+15	347	LinJ.35.3390	6.66552e+15	347	LinJ.08.0960	5.99581e+15	347	LinJ.06.0370	7.24813e+15
348	LbrM.13.1540	9.86728e+15	348	LbrM.35.2250	4.80955e+15	348	LbrM.11.0700	6.3696e+15	348	LinJ.34.4100	6.59567e+15	348	LinJ.02.0340	5.99482e+15	348	LinJ.17.0410	7.23108e+15
349	LbrM.06.0270	9.70006e+15	349	LbrM.01.0690	4.80793e+15	349	LbrM.29.2540	6.3674e+15	349	LinJ.32.0080	6.5587e+15	349	LinJ.36.2740	5.95022e+15	349	LinJ.11.1270	7.08531e+16
350	LbrM.35.6720	96.0	350	LbrM.27.2210	478372897156946	350	LbrM.17.0330	6.36311e+16	350	LinJ.20.0060	6.50027e+15	350	LinJ.36.2410	5.94812e+15	350	LinJ.30.3490	7.0802e+15
351	LbrM.35.5650	9.51786e+15	351	LbrM.26.2150	4.78175e+15	351	LbrM.23.0800	6.34692e+15	351	LinJ.22.1280	6.49829e+15	351	LinJ.28.0470	594374739238611	351	LinJ.14.0460	7.07426e+15
352	LbrM.34.4260	9.40418e+15	352	LbrM.35.0760	4.73972e+15	352	LbrM.11.0950	6.29644e+15	352	LinJ.25.0260	6.34423e+15	352	LinJ.19.1430	5.93967e+16	352	LinJ.26.2290	7.06806e+15
353	LbrM.20.2970	9.26864e+15	353	LbrM.16.0300	4.71832e+15	353	LbrM.35.5370	6.20508e+15	353	LinJ.30.3000	6.27005e+16	353	LinJ.21.0700	5.91054e+15	353	LinJ.15.1310	7.04137e+15
354	LbrM.31.2410	9.07264e+15	354	LbrM.21.0740	4.71009e+15	354	LbrM.35.4600	6.20435e+15	354	LinJ.09.0950	6.18271e+15	354	LinJ.28.1480	5.90686e+15	354	LinJ.28.2570	7.03583e+15
355	LbrM.27.0300	9.05066e+15	355	LbrM.31.3150	4.67945e+15	355	LbrM.16.0570	6.19566e+15	355	LinJ.27.1710	6.16243e+15	355	LinJ.01.0800	5.77283e+15	355	LinJ.13.1420	7.02741e+15
356	LbrM.17.1470	9.04378e+15	356	LbrM.26.1260	4.64911e+15	356	LbrM.27.0820	6.17862e+15	356	LinJ.31.2350	5.92632e+16	356	LinJ.36.3320	5.76976e+15	356	LinJ.35.4170	6.97749e+15
357	LbrM.03.0610	8.98645e+15	357	LbrM.26.0350	4.60472e+15	357	LbrM.30.3610	6.16881e+15	357	LinJ.35.1020	5.89062e+15	357	LinJ.27.1140	5.76612e+15	357	LinJ.18.0090	6.95846e+15
358	LbrM.04.0960	8.97514e+15	358	LbrM.33.2140	4.58448e+15	358	LbrM.25.2050	61507268984618	358	LinJ.34.0120	5.83052e+15	358	LinJ.35.3900	5.76558e+15	358	LinJ.34.3860	6.92691e+15
359	LbrM.20.6060	8.85903e+15	359	LbrM.22.0850	4.57114e+15	359	LbrM.06.1260	6.12473e+15	359	LinJ.28.0860	573229889659503	359	LinJ.08.0560	5.75859e+15	359	LinJ.16.1710	6.86899e+15
360	LbrM.35.2240	8.5862e+15	360	LbrM.28.2560	4.54037e+16	360	LbrM.16.1670	6.04261e+15	360	LinJ.35.2270	5.72112e+15	360	LinJ.34.2710	5.74068e+15	360	LinJ.23.1560	6.86191e+15
361	LbrM.25.2280	8.50799e+15	361	LbrM.28.2260	4.52744e+15	361	LbrM.28.3070	6.00833e+15	361	LinJ.11.0100	5.63764e+16	361	LinJ.18.0690	5.72971e+15	361	LinJ.31.1240	6.82789e+15
362	LbrM.35.0620	8.24979e+15	362	LbrM.11.1030	4.47726e+15	362	LbrM.23.1420	6.00571e+15	362	LinJ.33.1710	55688352028724	362	LinJ.35.2590	5.72905e+15	362	LinJ.07.0420	6.75947e+15
363	LbrM.07.0360	8.1677e+15	363	LbrM.16.0590	4.44873e+15	363	LbrM.30.3480	5.99923e+15	363	LinJ.36.6330	5.55167e+15	363	LinJ.36.0280	5.68918e+15	363	LinJ.29.1680	6.71015e+15
364	LbrM.14.1330	8.10123e+15	364	LbrM.20.0240	4.33081e+15	364	LbrM.22.1170	5.99698e+15	364	LinJ.36.6670	5.51219e+15	364	LinJ.25.1530	5.67562e+15	364	LinJ.11.0900	6.70035e+15
365	LbrM.14.0060	807121121717305	365	LbrM.10.0830	4.31892e+16	365	LbrM.32.1750	5.94499e+15	365	LinJ.30.1800	5.47871e+15	365	LinJ.35.2400	5.67405e+15	365	LinJ.07.0570	6.6839e+15
366	LbrM.17.0180	79341181180368	366	LbrM.32.0710	4.27702e+15	366	LbrM.31.0170	591536050198676	366	LinJ.19.0150	5.44321e+15	366	LinJ.24.2380	5.61214e+15	366	LinJ.28.2210	6.68045e+16
367	LbrM.05.0970	7.92712e+15	367	LbrM.07.0490	425747123339991	367	LbrM.35.3240	5.88174e+15	367	LinJ.34.4390	5.40837e+16	367	LinJ.16.0310	5.60537e+15	367	LinJ.01.0670	6.6454e+15
368	LbrM.35.6390	7.88538e+15	368	LbrM.34.5270	4.2411e+16	368	LbrM.35.5650	5.87533e+15	368	LinJ.28.3090	5.40612e+15	368	LinJ.36.2160	5.59203e+16	368	LinJ.36.1200	66258247775712
369	LbrM.34.3250	7.87145e+15	369	LbrM.29.1930	4.2353e+15	369	LbrM.30.2980	5.83566e+15	369	LinJ.34.0160	5.39809e+15	369	LinJ.02.0680	5.55588e+15	369	LinJ.29.1360	6.61108e+16
370	LbrM.07.1220	7.76068e+15	370	LbrM.10.0180	4.23059e+15	370	LbrM.20.2480	5.76119e+16	370	LinJ.35.3150	5.3801e+16	370	LinJ.31.0010	5.54006e+15	370	LinJ.31.2680	653677837041969
371	LbrM.21.0990	769468599413268	371	LbrM.27.2610	4.18673e+15	371	LbrM.30.0670	5.74791e+15	371	LinJ.36.4910	5.36596e+15	371	LinJ.36.3730	5.50724e+16	371	LinJ.28.1350	6.52547e+16
372	LbrM.32.0800	7.69269e+15	372	LbrM.01.0470	4.18017e+15	372	LbrM.22.1240	5.73341e+16	372	LinJ.08.0950	5.31135e+15	372	LinJ.01.0730	5.49515e+15	372	LinJ.16.0150	6.51681e+15
373	LbrM.26.0820	7.64846e+15	373	LbrM.28.0920	4.16332e+15	373	LbrM.28.1340	5.72854e+16	373	LinJ.21.1670	4.97708e+15	373	LinJ.35.0840	5.4861e+15	373	LinJ.34.3210	6.50597e+15
374	LbrM.29.1220	7.49464e+15	374	LbrM.33.1940	4.15699e+16	374	LbrM.19.1820	5.71299e+15	374	LinJ.25.1160	4.9383e+15	374	LinJ.34.3580	5.44864e+15	374	LinJ.36.0600	6.49234e+15
375	LbrM.12.0500	7.41362e+15	375	LbrM.14.1540	407871937818787	375	LbrM.34.0110	5.7125e+15	375	LinJ.22.1480	4.92584e+16	375	LinJ.28.3000	5.35562e+15	375	LinJ.08.0960	6.47842e+15
376	LbrM.22.0260	7.36757e+15	376	LbrM.35.1840	4.05902e+16	376	LbrM.27.1010	5.70925e+15	376	LinJ.19.0350	4.90651e+15	376	LinJ.11.1270	5.35229e+15	376	LinJ.36.2380	6.47751e+15
377	LbrM.28.2330	7.32767e+15	377	LbrM.08.0830	4.05607e+16	377	LbrM.30.1480	5.69857e+16	377	LinJ.13.1500	4.72332e+15	377	LinJ.35.1030	5.33523e+15	377	LinJ.32.1660	6.42555e+16
378	LbrM.10.0850	7.31891e+15	378	LbrM.20.3270	4.04009e+16	378	LbrM.27.1360	5.66255e+15	378	LinJ.34.1880	4.71971e+15	378	LinJ.32.3470	532016343112166	378	LinJ.35.0070	6.40098e+16
379	LbrM.35.3760	723604595152057	379	LbrM.35.5650	4.03717e+16	379	LbrM.08.0060	5.63083e+15	379	LinJ.27.2200	4.60504e+15	379	LinJ.12.0200	5.31055e+15	379	LinJ.36.2850	6.39314e+15
380	LbrM.26.0450	7.18785e+15	380	LbrM.35.4430	4.03095e+16	380	LbrM.20.0060	5.62302e+15	380	LinJ.36.7200	4.59339e+15	380	LinJ.27.1950	5.29493e+15	380	LinJ.16.1470	6.38228e+15
381	LbrM.35.6380	718433349550102	381	LbrM.20.6060	4.03081e+15	381	LbrM.19.0280	5.56771e+15	381	LinJ.35.1950	4.56507e+16	381	LinJ.06.0910	5.2711e+16	381	LinJ.32.1750	6.35831e+15
382	LbrM.34.0040	7.17159e+15	382	LbrM.19.0470	4.01755e+16	382	LbrM.02.0400	5.53004e+15	382	LinJ.13.1080	456062232927592	382	LinJ.03.0890	5.26846e+15	382	LinJ.27.1140	6.34648e+16
383	LbrM.33.1600	7.11704e+15	383	LbrM.25.0480	40129091872971	383	LbrM.21.0730	5.52877e+15	383	LinJ.31.2000	4.48143e+15	383	LinJ.36.0700	5.21275e+15	383	LinJ.36.3190	6.32774e+15
384	LbrM.20.2050	7.07705e+15	384	LbrM.20.4190	4.00659e+16	384	LbrM.22.1430	5.50415e+15	384	LinJ.34.3860	4.33034e+15	384	LinJ.15.1270	5.20343e+16	384	LinJ.14.1400	6.31961e+16
385	LbrM.28.1380	6.95877e+15	385	LbrM.11.0880	3.99327e+16	385	LbrM.28.0540	5.47697e+15	385	LinJ.09.1560	4.31453e+15	385	LinJ.27.2230	5.18873e+15	385	LinJ.16.0580	6.30643e+15
386	LbrM.33.0940	6.90127e+15	386	LbrM.27.0660	3.98272e+16	386	LbrM.31.3150	5.43175e+15	386	LinJ.10.0310	4.26028e+16	386	LinJ.34.4320	515695532952997	386	LinJ.06.0910	6.28423e+15
387	LbrM.16.0920	6.86447e+15	387	LbrM.32.1100	3.97947e+16	387	LbrM.22.1310	5.39381e+15	387	LinJ.31.2590	4.21614e+15	387	LinJ.26.2240	5.09147e+15	387	LinJ.12.0850	6.27885e+15
388	LbrM.10.1270	6.67016e+15	388	LbrM.14.0350	3.97007e+15	388	LbrM.35.6270	5.39353e+15	388	LinJ.29.2780	4.21159e+15	388	LinJ.36.5630	507949817191756	388	LinJ.27.2230	6.27522e+15
389	LbrM.10.0990	6.61402e+15	389	LbrM.35.7120	3.96701e+15	389	LbrM.13.0760	5.36831e+15	389	LinJ.10.0540	4.19833e+16	389	LinJ.35.3280	5.07689e+15	389	LinJ.36.2740	6.26818e+15
390	LbrM.18.1070	6.56372e+15	390	LbrM.19.1660	3.96336e+16	390	LbrM.23.1080	5.35067e+15	390	LinJ.09.0820	4.14281e+15	390	LinJ.29.2080	5.05265e+15	390	LinJ.07.0350	6.24238e+15
391	LbrM.35.2380	6.52024e+15	391	LbrM.08.0600	3.95043e+16	391	LbrM.18.0760	5.33991e+15	391	LinJ.36.2270	4.12364e+16	391	LinJ.22.0770	5.04501e+16	391	LinJ.35.2590	622208206091404
392	LbrM.19.1020	6.4874e+15	392	LbrM.08.0810	3.92795e+15	392	LbrM.11.1030	5.32594e+15	392	LinJ.11.0270	4.12106e+15	392	LinJ.14.0350	5.04005e+15	392	LinJ.15.0040	6.21054e+15
393	LbrM.25.2330	6.37274e+16	393	LbrM.34.1300	3.92577e+15	393	LbrM.21.0840	5.32045e+15	393	LinJ.14.0190	4.07344e+16	393	LinJ.34.4290	4.98698e+15	393	LinJ.29.0140	6.18692e+15
394	LbrM.23.0220	6.36818e+15	394	LbrM.20.2700	3.92019e+16	394	LbrM.18.1610	5.30149e+15	394	LinJ.20.1270	4.03145e+15	394	LinJ.33.1970	4.95363e+15	394	LinJ.02.0360	6.15339e+16
395	LbrM.32.2000	6.24731e+15	395	LbrM.18.0720	3.91668e+15	395	LbrM.20.0330	5.29888e+16	395	LinJ.21.0990	4.01813e+15	395	LinJ.07.0420	4.92964e+15	395	LinJ.28.0110	6.14825e+16
396	LbrM.35.0150	6.24353e+15	396	LbrM.23.0460	3.91492e+16	396	LbrM.32.1840	5.27259e+15	396	LinJ.27.0790	3.99491e+15	396	LinJ.35.1700	491237875147998	396	LinJ.12.0200	6.12135e+15
397	LbrM.22.1430	6.2331e+15	397	LbrM.19.0650	3.91023e+16	397	LbrM.30.1420	5.23015e+15	397	LinJ.36.6490	3.99152e+15	397	LinJ.34.0950	4.89626e+15	397	LinJ.21.1320	6.09436e+16
398	LbrM.32.0650	617513858546086	398	LbrM.19.1280	3.90733e+16	398	LbrM.27.2750	5.22764e+16	398	LinJ.14.1510	3.9761e+15	398	LinJ.13.0160	4.89213e+15	398	LinJ.28.1480	6.05063e+15
399	LbrM.34.1610	6.04141e+16	399	LbrM.11.0090	3.84549e+15	399	LbrM.35.3800	5.22057e+16	399	LinJ.36.1840	3.96667e+16	399	LinJ.18.0830	4.87549e+15	399	LinJ.19.0150	6.04293e+16
400	LbrM.25.0840	5.92322e+15	400	LbrM.21.1310	3.83153e+16	400	LbrM.33.1160	5.20683e+15	400	LinJ.27.0300	3.95676e+15	400	LinJ.18.0700	4.83027e+15	400	LinJ.18.0700	6.00404e+15
401	LbrM.14.0820	5.91185e+16	401	LbrM.18.1100	3.8194e+15	401	LbrM.35.3390	5.12355e+15	401	LinJ.30.1710	393627872780156	401	LinJ.27.2350	4.78215e+15	401	LinJ.33.2860	5.9887e+15
402	LbrM.35.3070	5.79238e+16	402	LbrM.35.0450	3.80232e+16	402	LbrM.08.0590	511085423407223	402	LinJ.36.2390	3.84039e+16	402	LinJ.28.1660	4.78074e+15	402	LinJ.23.0410	5.97326e+15
403	LbrM.33.0990	5.59741e+16	403	LbrM.05.1060	3.79585e+16	403	LbrM.20.3380	5.08012e+15	403	LinJ.33.1470	3.82301e+15	403	LinJ.34.0250	4.75072e+15	403	LinJ.18.1090	5.96997e+15
404	LbrM.34.2820	5.37346e+15	404	LbrM.32.3220	3.78222e+15	404	LbrM.21.1410	5.07038e+15	404	LinJ.11.0640	3.80639e+15	404	LinJ.25.1430	4.69944e+15	404	LinJ.19.1430	5.96003e+15
405	LbrM.07.0960	5.35794e+15	405	LbrM.34.3070	3.76512e+16	405	LbrM.18.1190	5.02533e+15	405	LinJ.17.1550	3.76667e+16	405	LinJ.14.1450	4.69593e+15	405	LinJ.06.0990	5.95144e+16
406	LbrM.35.2370	533560085428227	406	LbrM.15.0090	3.75717e+16	406	LbrM.35.0760	5.01677e+15	406	LinJ.26.0770	3.74113e+16	406	LinJ.06.0990	4.66864e+16	406	LinJ.04.0330	5.91213e+15
407	LbrM.04.1170	5.33138e+15	407	LbrM.21.1700	3.73793e+15	407	LbrM.12.0230	5.00682e+15	407	LinJ.30.0880	3.73414e+15	407	LinJ.31.2890	4.65933e+15	407	LinJ.08.0560	5.89521e+15
408	LbrM.19.0860	5.31481e+15	408	LbrM.19.1040	3.73095e+16	408	LbrM.28.2270	5.0065e+15	408	LinJ.08.1110	3.69876e+15	408	LinJ.15.0090	461198523282301	408	LinJ.30.3300	5.84162e+15
409	LbrM.05.0430	53.0	409	LbrM.05.0350	3.72791e+16	409	LbrM.34.1000	5.00244e+15	409	LinJ.08.1040	3.65059e+16	409	LinJ.28.2530	4.57722e+15	409	LinJ.11.0700	5.80572e+15
410	LbrM.34.4100	5.14744e+15	410	LbrM.20.4450	3.72598e+15	410	LbrM.34.0360	4.96015e+15	410	LinJ.32.2770	3.63704e+15	410	LinJ.27.1520	457294995672727	410	LinJ.10.0160	5.75686e+15
411	LbrM.35.4150	5.08247e+16	411	LbrM.22.0420	372431396693242	411	LbrM.04.1250	4.90923e+15	411	LinJ.28.0110	36.0	411	LinJ.32.3120	4.56969e+15	411	LinJ.02.0340	5.73406e+15
412	LbrM.31.2060	50.0	412	LbrM.30.3280	3.72301e+16	412	LbrM.10.0180	48548347147337	412	LinJ.34.2100	3.55658e+16	412	LinJ.25.0540	4.56409e+15	412	LinJ.17.0300	5.68218e+15
413	LbrM.30.1750	4.96207e+16	413	LbrM.28.1520	367474790043832	413	LbrM.22.0850	4.78298e+15	413	LinJ.36.6850	3.51343e+15	413	LinJ.10.0160	4.55201e+15	413	LinJ.22.0540	567461157239653
414	LbrM.26.0500	4.94902e+15	414	LbrM.34.5180	3.65181e+15	414	LbrM.34.0810	4.77173e+15	414	LinJ.30.2720	3.51317e+15	414	LinJ.35.0370	4.50529e+15	414	LinJ.07.0130	5.65825e+15
415	LbrM.20.5360	4.85068e+16	415	LbrM.08.0090	3.64392e+16	415	LbrM.26.0830	474477425095938	415	LinJ.36.1670	3.50435e+16	415	LinJ.30.3120	4.50217e+15	415	LinJ.28.0470	5.60959e+15
416	LbrM.30.3590	48.0	416	LbrM.30.0700	3.64368e+16	416	LbrM.21.1310	4.7336e+15	416	LinJ.03.0030	35.0	416	LinJ.35.1390	4.49564e+15	416	LinJ.36.3730	5.60568e+15
417	LbrM.15.1470	4.7303e+15	417	LbrM.07.0270	3.64025e+15	417	LbrM.25.0480	471732420601599	417	LinJ.36.6860	3.49856e+15	417	LinJ.11.0040	4.49288e+15	417	LinJ.36.2160	5.59797e+15
418	LbrM.28.2090	4.67285e+15	418	LbrM.35.3110	3.62183e+16	418	LbrM.33.2140	4.71609e+15	418	LinJ.28.1050	34606472714263	418	LinJ.08.0010	4.48615e+15	418	LinJ.33.1660	5.58454e+15
419	LbrM.10.0950	4.66207e+15	419	LbrM.34.4570	3.61902e+15	419	LbrM.31.0720	4.70936e+15	419	LinJ.17.1260	3.42822e+15	419	LinJ.25.2290	4.43159e+15	419	LinJ.11.0960	557036175730682
420	LbrM.30.1590	4.63449e+15	420	LbrM.18.0530	3.61018e+16	420	LbrM.28.1520	4.70715e+15	420	LinJ.29.0910	3.40178e+15	420	LinJ.34.3470	4.41633e+15	420	LinJ.21.1450	5.50911e+15
421	LbrM.03.0210	4.63255e+15	421	LbrM.21.0610	3.60235e+16	421	LbrM.29.1930	4.68009e+15	421	LinJ.36.3220	3.34577e+15	421	LinJ.15.0030	4.3985e+15	421	LinJ.34.4290	5.50084e+15
422	LbrM.25.0580	4.51084e+15	422	LbrM.28.1500	3.59345e+16	422	LbrM.24.2210	4.65534e+16	422	LinJ.22.0490	3.27915e+15	422	LinJ.14.0150	4.38483e+15	422	LinJ.34.0250	5.50003e+15
423	LbrM.32.2980	4.50732e+15	423	LbrM.32.3320	3.58567e+15	423	LbrM.07.0490	4.65349e+15	423	LinJ.31.2060	3.26162e+15	423	LinJ.23.0470	4.38209e+15	423	LinJ.15.1140	5.43583e+15
424	LbrM.16.0930	4.44969e+15	424	LbrM.16.1410	3.58312e+15	424	LbrM.17.0790	4.63769e+15	424	LinJ.28.2660	3.25567e+15	424	LinJ.36.4390	4.37852e+15	424	LinJ.27.1950	5.42706e+15
425	LbrM.26.1550	4.4446e+15	425	LbrM.01.0310	3.57914e+16	425	LbrM.25.1330	4.63272e+15	425	LinJ.26.0120	3.18729e+16	425	LinJ.27.1790	4.37243e+15	425	LinJ.29.1900	5.42259e+15
426	LbrM.35.1950	4.39925e+15	426	LbrM.33.2130	3.5721e+16	426	LbrM.08.0830	4.62143e+15	426	LinJ.08.0080	3.15612e+16	426	LinJ.34.1370	4.32568e+15	426	LinJ.36.0700	5.37047e+15
427	LbrM.35.2180	4.39385e+15	427	LbrM.23.0270	356214562699162	427	LbrM.28.0340	4.61296e+15	427	LinJ.24.1610	3.1492e+16	427	LinJ.18.0020	4.29952e+15	427	LinJ.30.3640	5.34315e+15
428	LbrM.20.3170	4.37695e+15	428	LbrM.11.0370	3.5615e+15	428	LbrM.19.0190	459699867798257	428	LinJ.28.0410	3.12276e+16	428	LinJ.22.1110	4.29374e+15	428	LinJ.26.1220	5.33201e+15
429	LbrM.32.3140	4.37224e+15	429	LbrM.18.0030	3.55523e+15	429	LbrM.31.0010	4.5911e+15	429	LinJ.32.0870	3.08333e+16	429	LinJ.19.0330	4.28243e+15	429	LinJ.32.1920	5.31898e+16
430	LbrM.06.1170	4.28849e+16	430	LbrM.14.1020	3.55417e+15	430	LbrM.33.1940	4.57664e+15	430	LinJ.36.1920	305258553455021	430	LinJ.11.0180	4.27826e+15	430	LinJ.36.2410	5.30696e+15
431	LbrM.33.1620	4.21007e+15	431	LbrM.35.4080	35527670218278	431	LbrM.21.1000	4.57163e+15	431	LinJ.21.1250	3.04917e+15	431	LinJ.22.1380	4.2714e+15	431	LinJ.34.4320	5.29258e+15
432	LbrM.23.0570	4.14943e+15	432	LbrM.20.5550	3.55263e+16	432	LbrM.16.0590	4.47782e+15	432	LinJ.34.0850	2.98689e+16	432	LinJ.05.1060	4.23783e+15	432	LinJ.34.3670	5.28123e+15
433	LbrM.20.3950	4.08186e+15	433	LbrM.15.1190	3.55042e+16	433	LbrM.34.0690	4.47451e+15	433	LinJ.34.2320	2.97791e+16	433	LinJ.08.0570	4.22131e+15	433	LinJ.35.2720	5.25806e+16
434	LbrM.25.0600	3.93388e+16	434	LbrM.20.3330	3.54436e+16	434	LbrM.15.1190	4.41057e+15	434	LinJ.23.0410	2.96501e+15	434	LinJ.35.1580	4.21116e+15	434	LinJ.17.0870	52572173253451
435	LbrM.31.2820	3.91521e+15	435	LbrM.32.3210	3.53827e+16	435	LbrM.19.1280	4.40995e+15	435	LinJ.36.6960	2.85602e+16	435	LinJ.32.0660	4.19883e+15	435	LinJ.02.0680	5.2101e+15
436	LbrM.27.1720	39.0	436	LbrM.34.2390	3.53717e+15	436	LbrM.27.1450	4.37222e+15	436	LinJ.34.1570	2.85375e+15	436	LinJ.34.3530	4.19856e+15	436	LinJ.29.2080	5.20917e+15
437	LbrM.20.0020	3.88373e+15	437	LbrM.27.2010	3.53666e+16	437	LbrM.10.0310	4.35606e+15	437	LinJ.34.0900	28.0	437	LinJ.10.0750	4.19394e+15	437	LinJ.18.0690	5.19204e+15
438	LbrM.12.0240	3.88118e+15	438	LbrM.03.0700	3.53578e+16	438	LbrM.20.2700	4.3541e+15	438	LinJ.35.0110	2.79626e+15	438	LinJ.32.1060	4.1926e+15	438	LinJ.34.0510	518902160421377
439	LbrM.20.0010	3.86917e+15	439	LbrM.27.2620	3.53277e+16	439	LbrM.04.0610	4.34298e+15	439	LinJ.01.0790	2.79254e+16	439	LinJ.18.1050	4.17471e+15	439	LinJ.27.1230	5.18868e+15
440	LbrM.35.2040	3.86697e+16	440	LbrM.30.0160	3.532e+15	440	LbrM.11.0880	4.3333e+15	439	LinJ.01.0800	2.79254e+16	440	LinJ.19.0150	4.16959e+15	440	LinJ.08.1040	5.16991e+15
441	LbrM.26.2150	3.80121e+15	440	LbrM.20.2670	3.532e+15	441	LbrM.33.2110	4.29198e+15	441	LinJ.32.1940	2.78764e+16	441	LinJ.32.0460	4.15054e+16	441	LinJ.16.0260	5.12716e+16
442	LbrM.04.0610	3.69111e+16	440	LbrM.35.1910	3.532e+15	442	LbrM.34.3840	4.27736e+15	442	LinJ.34.0150	2.71851e+15	442	LinJ.35.4660	4.14549e+15	442	LinJ.33.1970	5.1252e+15
443	LbrM.13.0390	3.61511e+15	443	LbrM.05.0650	3.532e+16	443	LbrM.18.1100	4.27126e+15	443	LinJ.32.1090	2.68617e+16	443	LinJ.29.0060	4.09414e+16	443	LinJ.36.3320	5.05352e+15
444	LbrM.33.3460	3.60386e+15	444	LbrM.27.0610	3532.0	444	LbrM.35.4430	4.26765e+15	444	LinJ.26.0140	2.66546e+16	444	LinJ.32.3320	4.08874e+16	444	LinJ.29.2620	5.04757e+15
445	LbrM.34.1000	3.60259e+15	444	LbrM.35.0830	3532.0	445	LbrM.05.1060	4.26668e+15	445	LinJ.30.1550	2.64027e+16	445	LinJ.12.0850	4.08038e+16	445	LinJ.24.0790	5.04372e+15
446	LbrM.30.2440	35946364099366	446	LbrM.09.1100	3.532e+15	446	LbrM.23.0460	4.26077e+15	446	LinJ.07.1160	2.62394e+16	446	LinJ.19.0050	4.0647e+16	446	LinJ.22.1380	5.02993e+16
447	LbrM.21.0070	3.56571e+16	447	LbrM.03.0820	3.52178e+15	447	LbrM.03.0060	4.25483e+15	447	LinJ.28.1660	2.60368e+16	447	LinJ.19.0730	4.03663e+16	447	LinJ.27.2360	4.98692e+15
448	LbrM.10.1010	3.54078e+15	448	LbrM.25.1770	3.51692e+16	448	LbrM.03.0510	423640998475998	448	LinJ.14.1460	2.58228e+16	448	LinJ.05.0350	4.01757e+16	448	LinJ.03.0890	4.96983e+15
449	LbrM.25.0590	3.46576e+16	449	LbrM.28.2890	3.48648e+15	449	LbrM.20.0240	4.23437e+15	449	LinJ.28.2600	2.57324e+15	449	LinJ.01.0180	4.01149e+16	449	LinJ.18.0450	4.96956e+15
449	LbrM.25.0610	3.46576e+16	450	LbrM.34.0580	3.45424e+15	450	LbrM.35.0510	4.23206e+15	450	LinJ.33.0530	2.53333e+16	450	LinJ.36.3750	4.00099e+16	450	LinJ.36.3860	4.9693e+15
451	LbrM.35.1480	3.29255e+15	451	LbrM.29.2720	3.41399e+15	451	LbrM.19.1660	4.20433e+15	451	LinJ.35.3060	2.51966e+16	451	LinJ.35.3210	4.00061e+15	451	LinJ.32.3820	4.96424e+15
452	LbrM.34.3870	3.11564e+16	452	LbrM.34.3160	3.39975e+16	452	LbrM.09.1540	4.19781e+15	452	LinJ.21.2230	2.51515e+16	452	LinJ.02.0330	3.99788e+15	452	LinJ.22.1210	4.95984e+15
453	LbrM.21.1310	3.1089e+16	453	LbrM.30.2590	3.39474e+16	453	LbrM.32.0710	4.19287e+15	453	LinJ.14.0060	2.50602e+15	453	LinJ.31.1240	3.99084e+15	453	LinJ.36.2490	4.95947e+15
454	LbrM.30.2950	3.05379e+16	454	LbrM.15.1100	3.39272e+16	454	LbrM.04.0530	419273113956023	454	LinJ.15.1500	247914395457064	454	LinJ.35.5200	3.9831e+16	454	LinJ.16.1450	4.92099e+15
455	LbrM.34.1220	3.02838e+16	455	LbrM.35.3820	3.35433e+16	455	LbrM.34.0740	419038744422609	455	LinJ.15.1120	2.35715e+15	455	LinJ.20.1660	3.98074e+15	455	LinJ.29.2780	4.90561e+15
456	LbrM.25.1010	3.02666e+15	456	LbrM.29.0070	3.3486e+16	456	LbrM.19.1040	4.16761e+15	456	LinJ.36.0930	2.3571e+16	456	LinJ.22.0350	3.97753e+15	456	LinJ.25.0540	4.89202e+15
457	LbrM.21.2010	3.00267e+16	457	LbrM.19.1360	3.33782e+15	457	LbrM.22.0420	4.14721e+15	457	LinJ.13.1420	2.33385e+16	457	LinJ.08.0090	3.96388e+16	457	LinJ.12.0190	4.88734e+15
458	LbrM.25.0940	2.97009e+16	458	LbrM.22.1430	3.3038e+15	458	LbrM.20.4450	413900396661388	458	LinJ.31.2980	2.29649e+16	458	LinJ.26.1220	3.95517e+15	458	LinJ.18.0830	4.88021e+15
459	LbrM.19.0570	2.90335e+15	459	LbrM.35.5070	3.26563e+16	459	LbrM.35.1750	4.12939e+15	459	LinJ.18.1010	2.29598e+16	459	LinJ.36.7080	3.95448e+15	459	LinJ.03.0040	4.87973e+15
460	LbrM.09.1510	2.89166e+16	460	LbrM.19.0140	3.26346e+16	460	LbrM.29.1160	4.11652e+15	460	LinJ.31.2890	226043215450414	460	LinJ.11.0510	3.93819e+15	460	LinJ.08.1280	4.86209e+15
461	LbrM.10.1110	2.82905e+16	461	LbrM.31.2940	3.24295e+16	461	LbrM.18.0030	4.11241e+16	461	LinJ.08.1300	2.23675e+16	461	LinJ.19.0180	3.92657e+15	461	LinJ.32.1060	4.84464e+15
462	LbrM.20.2450	2.82011e+16	462	LbrM.29.2120	3.23178e+15	462	LbrM.28.2260	4.10307e+15	462	LinJ.33.1510	2.23333e+16	462	LinJ.29.2250	3.91753e+16	462	LinJ.34.0120	4.83774e+15
463	LbrM.32.3920	2.81021e+15	463	LbrM.29.2540	3.22014e+16	463	LbrM.14.1540	4.10173e+15	463	LinJ.01.0270	2.21676e+16	463	LinJ.36.7360	3.90477e+16	463	LinJ.11.0040	4.81453e+15
464	LbrM.28.0280	2.79333e+16	464	LbrM.05.0140	3.21045e+15	464	LbrM.20.3270	4.09349e+16	464	LinJ.34.1200	2.20942e+16	464	LinJ.32.3220	3.90238e+16	464	LinJ.21.0840	4.79981e+15
465	LbrM.10.0310	2.70917e+16	465	LbrM.28.1740	3.20918e+15	465	LbrM.05.0560	4.09232e+15	465	LinJ.19.0820	2.20735e+16	465	LinJ.01.0280	3.89196e+15	465	LinJ.34.3580	4.78424e+15
466	LbrM.27.1950	2.69923e+15	466	LbrM.19.0630	3.19949e+15	466	LbrM.08.0090	4.07245e+16	466	LinJ.35.5320	2.16667e+16	466	LinJ.33.1960	3.88529e+15	466	LinJ.17.0400	4.73484e+15
467	LbrM.13.0960	2.63156e+15	467	LbrM.05.1140	3.19591e+15	467	LbrM.27.2610	4.06934e+15	467	LinJ.26.0310	2.15355e+16	467	LinJ.18.0470	3.88227e+16	467	LinJ.34.1370	4.68545e+15
468	LbrM.31.2100	26.0	468	LbrM.35.6590	31865811986861	468	LbrM.35.3110	4.06e+16	468	LinJ.21.2200	2.14935e+16	468	LinJ.13.0260	3.88016e+15	468	LinJ.14.0150	4.68248e+15
469	LbrM.20.0720	2.59841e+16	469	LbrM.34.1400	3.1434e+16	469	LbrM.05.1140	4.05142e+16	469	LinJ.10.0780	2.13255e+15	469	LinJ.23.0280	3.87176e+16	469	LinJ.26.2240	4.68161e+15
470	LbrM.30.0940	2.55688e+15	470	LbrM.31.1450	3.10767e+16	470	LbrM.28.0920	4.05043e+15	470	LinJ.32.2880	209173372267514	470	LinJ.30.2530	3.87001e+16	470	LinJ.23.0470	4.66001e+15
471	LbrM.31.0720	254357748584689	471	LbrM.14.0140	309377805084205	471	LbrM.34.4570	4.04298e+16	471	LinJ.11.1270	2.08969e+16	471	LinJ.20.1370	3.86557e+16	471	LinJ.30.3120	464062036941509
472	LbrM.24.1320	2.54302e+15	472	LbrM.32.0600	307903031840749	472	LbrM.28.1500	4.03735e+15	472	LinJ.33.3340	2.08763e+16	472	LinJ.14.1100	386178322306062	472	LinJ.35.0370	4.63253e+16
473	LbrM.21.1500	2.49908e+15	473	LbrM.11.0970	3.06325e+15	473	LbrM.35.0310	4.02671e+16	473	LinJ.05.0070	2.07719e+16	473	LinJ.25.1500	3.85312e+15	473	LinJ.33.0260	4.62764e+15
474	LbrM.35.4660	2.48744e+16	474	LbrM.18.0920	3.06005e+15	474	LbrM.32.3320	4.01887e+15	474	LinJ.10.1090	2.03281e+15	474	LinJ.03.0790	3.84875e+16	474	LinJ.14.1450	459584769408249
474	LbrM.35.3500	2.48744e+16	475	LbrM.30.0140	3.05805e+16	475	LbrM.01.0310	4.01552e+15	475	LinJ.20.0670	1.97376e+15	475	LinJ.07.0280	3.84554e+16	475	LinJ.16.0560	4.56877e+15
476	LbrM.24.2140	2.36152e+16	476	LbrM.28.0570	3.05681e+16	476	LbrM.18.0530	4.01209e+16	476	LinJ.12.0850	1.96634e+16	476	LinJ.36.5050	3.84522e+15	476	LinJ.05.1060	4.56793e+15
477	LbrM.02.0420	2.35471e+15	477	LbrM.27.1750	3.03993e+16	477	LbrM.33.2130	4.01061e+16	477	LinJ.27.2390	1.96012e+16	477	LinJ.01.0430	3.84467e+15	477	LinJ.11.0180	4.55725e+15
478	LbrM.35.2550	2.35041e+15	478	LbrM.25.2130	3.03359e+16	478	LbrM.08.0340	4.01019e+15	478	LinJ.36.6510	1.94298e+16	478	LinJ.27.2360	3.84269e+15	478	LinJ.32.3120	4.54682e+15
479	LbrM.20.2340	2.29054e+15	479	LbrM.02.0390	3.03185e+15	479	LbrM.16.1410	4.00625e+15	479	LinJ.36.3690	1.91912e+15	479	LinJ.36.1800	3.842e+15	479	LinJ.25.1530	4.54563e+15
480	LbrM.35.4710	2.26217e+16	480	LbrM.22.1540	2.99633e+15	480	LbrM.34.5210	3.9998e+15	480	LinJ.16.0920	1.89363e+16	480	LinJ.22.1530	3842.0	480	LinJ.36.1840	4.53199e+15
481	LbrM.33.0340	2.19568e+16	481	LbrM.25.1100	2.99362e+15	481	LbrM.20.5550	3.99327e+16	481	LinJ.21.0770	1.88012e+16	480	LinJ.32.4040	3842.0	481	LinJ.36.6670	4.527e+15
482	LbrM.20.1010	2.1544e+16	482	LbrM.35.7100	2.99135e+16	482	LbrM.23.0270	3.99121e+16	482	LinJ.12.0007	1.81582e+15	480	LinJ.09.1100	3842.0	482	LinJ.36.6220	4.52467e+15
483	LbrM.27.2150	2.07647e+16	483	LbrM.20.0470	2.98387e+15	483	LbrM.14.1020	3.98802e+16	483	LinJ.25.1460	1.81498e+15	483	LinJ.07.0910	3.842e+16	483	LinJ.31.0010	4.51735e+15
484	LbrM.20.4800	2.06354e+15	484	LbrM.33.1020	2.97034e+16	484	LbrM.10.1280	3.98635e+16	484	LinJ.23.0340	1.8037e+16	484	LinJ.30.0150	3.842e+15	484	LinJ.18.1050	4.51696e+15
485	LbrM.31.2970	2.04438e+15	485	LbrM.30.3180	2.91806e+16	485	LbrM.35.4420	3.9809e+15	485	LinJ.18.0990	1.76377e+15	484	LinJ.27.2440	3.842e+15	485	LinJ.36.4390	4.51448e+15
486	LbrM.18.0310	1.98953e+15	486	LbrM.07.0090	2.90259e+16	486	LbrM.27.2010	3.9735e+16	486	LinJ.28.0870	1.74163e+15	484	LinJ.05.0140	3.842e+15	486	LinJ.36.4690	4.48938e+15
487	LbrM.32.3240	1.88584e+16	487	LbrM.28.2050	2.88328e+16	487	LbrM.03.0700	3.97219e+15	487	LinJ.34.0630	1.73771e+15	487	LinJ.36.0600	3.84133e+15	487	LinJ.29.1190	4.48705e+15
488	LbrM.29.2670	1.85569e+16	488	LbrM.33.2190	2.86307e+15	488	LbrM.20.2670	3.97e+15	488	LinJ.24.0780	1.73214e+15	488	LinJ.35.2490	3.83133e+16	488	LinJ.35.4660	4.46914e+16
489	LbrM.29.2540	1.83741e+16	489	LbrM.06.1260	2.84239e+16	488	LbrM.30.0160	3.97e+15	489	LinJ.21.1870	1.7159e+16	489	LinJ.28.0580	382908689120847	489	LinJ.32.3320	4.44054e+15
490	LbrM.26.0270	1.81961e+16	490	LbrM.03.0090	2.82584e+15	490	LbrM.09.1100	3970.0	490	LinJ.19.0250	1.69865e+16	490	LinJ.11.0410	3.82764e+16	490	LinJ.01.0180	4.43675e+15
491	LbrM.18.0030	18.0	491	LbrM.32.0520	2.80767e+15	490	LbrM.35.1910	3970.0	491	LinJ.04.0570	1.68619e+15	491	LinJ.28.2880	3.81659e+15	491	LinJ.30.2480	4.43358e+15
491	LbrM.35.0510	18.0	492	LbrM.11.0480	2.80188e+15	490	LbrM.35.0830	3970.0	492	LinJ.36.2290	1.64357e+16	492	LinJ.02.0360	3.78296e+16	492	LinJ.21.0700	4.40113e+15
491	LbrM.18.0290	18.0	493	LbrM.35.1390	2.79922e+16	490	LbrM.27.0610	3970.0	493	LinJ.31.1240	1.63333e+16	493	LinJ.35.1490	3.77437e+15	493	LinJ.27.2350	4.40111e+15
491	LbrM.29.2330	18.0	494	LbrM.34.1360	2.79105e+16	490	LbrM.12.0480	3970.0	494	LinJ.17.0680	1.62152e+16	494	LinJ.36.4040	3.76155e+16	494	LinJ.30.2540	4.39931e+15
491	LbrM.28.1520	18.0	495	LbrM.13.1520	2.78217e+15	490	LbrM.09.0170	3970.0	495	LinJ.34.0080	16.0	495	LinJ.32.4070	3.7471e+15	495	LinJ.29.0070	4.39901e+15
496	LbrM.27.2210	1.79606e+16	496	LbrM.19.0410	2.75865e+15	490	LbrM.01.0170	3970.0	496	LinJ.36.2480	1.57348e+16	496	LinJ.35.0580	3.71758e+16	496	LinJ.02.0330	4.38764e+15
497	LbrM.32.3550	1.69342e+16	497	LbrM.15.1250	2.75298e+15	497	LbrM.35.2520	3.9599e+15	497	LinJ.30.3530	1.56576e+16	497	LinJ.28.0940	3.68559e+16	497	LinJ.27.2390	4.38733e+15
498	LbrM.35.2490	1.68802e+16	498	LbrM.33.1830	2.75277e+15	498	LbrM.21.0740	3.95678e+15	498	LinJ.33.1850	1.55429e+16	498	LinJ.19.1200	3.67601e+16	498	LinJ.35.1580	438419385474097
499	LbrM.31.1820	1.68796e+15	499	LbrM.19.0370	2.74291e+15	499	LbrM.22.0560	3.93196e+16	499	LinJ.32.1060	1.55005e+16	499	LinJ.23.0410	3.64978e+16	499	LinJ.28.2530	4.38016e+15
500	LbrM.34.2090	1.61919e+16	500	LbrM.27.1390	2.72477e+15	500	LbrM.28.0710	3.92397e+16	500	LinJ.23.0050	1.54807e+15	500	LinJ.30.2470	3.6109e+15	500	LinJ.05.0350	4.36967e+15
501	LbrM.20.0150	1.58178e+16	501	LbrM.13.0020	2.72439e+15	501	LbrM.19.0140	3.91347e+15	501	LinJ.30.1030	1.49869e+16	501	LinJ.07.0240	3.58309e+15	501	LinJ.01.0730	4.36925e+15
502	LbrM.09.1170	1.57495e+15	502	LbrM.35.2580	2.70767e+15	502	LbrM.21.0950	390722670293816	502	LinJ.27.1520	1.46943e+16	502	LinJ.33.1660	3.55872e+16	502	LinJ.22.1280	4.36072e+15
503	LbrM.20.0730	1.54955e+16	503	LbrM.27.2760	2.69882e+15	503	LbrM.01.0470	3.90126e+16	503	LinJ.13.1490	1.43875e+16	503	LinJ.30.2620	3.55525e+15	503	LinJ.08.0090	4.3573e+15
504	LbrM.23.0750	1.5424e+16	504	LbrM.08.0900	2.69227e+16	504	LbrM.10.0830	3.89344e+16	504	LinJ.28.2860	1.38429e+15	504	LinJ.30.3230	3.5268e+15	504	LinJ.22.0350	4.34768e+15
505	LbrM.30.3100	1.51562e+16	505	LbrM.34.3140	2.6899e+15	505	LbrM.34.5180	3.87848e+15	505	LinJ.12.0580	1.35864e+16	505	LinJ.05.1140	3.51679e+15	505	LinJ.35.4010	4.33728e+15
506	LbrM.31.2830	1.48995e+16	506	LbrM.35.6270	2.68321e+16	506	LbrM.11.0090	3.87031e+15	506	LinJ.36.1930	1.35645e+16	506	LinJ.31.2670	3.50674e+15	506	LinJ.36.7360	4.28853e+15
507	LbrM.32.0780	1.47519e+16	507	LbrM.32.2010	2.67866e+15	507	LbrM.20.1640	3.84875e+16	507	LinJ.35.3670	1.33603e+15	507	LinJ.23.1920	3.49464e+16	507	LinJ.34.3470	4.28111e+15
508	LbrM.19.1710	1.47489e+16	508	LbrM.17.1550	2.67402e+15	508	LbrM.32.3220	3.84655e+15	508	LinJ.36.3250	1.31793e+16	508	LinJ.35.3300	3.48806e+15	508	LinJ.32.3220	4.27914e+15
509	LbrM.13.1220	147202255366623	509	LbrM.16.1600	2.66974e+15	509	LbrM.05.0140	3.82771e+16	509	LinJ.36.4100	1.30856e+15	509	LinJ.29.2680	3.48323e+15	509	LinJ.01.0280	4.27737e+15
510	LbrM.35.5030	1.41066e+15	510	LbrM.34.5160	2.66701e+15	510	LbrM.32.3560	3.81174e+16	510	LinJ.18.0700	1.29003e+16	510	LinJ.36.6530	3.4726e+16	510	LinJ.11.0240	4.27195e+15
511	LbrM.22.1180	140638674167128	511	LbrM.29.2890	2.6418e+15	511	LbrM.29.2480	3.7515e+16	511	LinJ.28.1420	1.22207e+16	511	LinJ.08.1040	3.47176e+16	511	LinJ.09.1560	4.27119e+15
512	LbrM.13.1470	1.39372e+16	512	LbrM.30.3300	2.63164e+15	512	LbrM.23.0330	3.72772e+16	512	LinJ.35.0780	1.18793e+15	512	LinJ.22.0450	346592439320087	512	LinJ.18.0470	426877827046879
513	LbrM.13.1350	1.36069e+16	513	LbrM.15.0030	2.62453e+15	513	LbrM.15.1250	3.69894e+16	513	LinJ.36.3430	1.17686e+16	513	LinJ.36.2490	3.44701e+15	513	LinJ.32.0660	4.26692e+15
514	LbrM.01.0500	1.33752e+16	514	LbrM.03.0510	2.59473e+16	514	LbrM.35.3820	3.65214e+15	514	LinJ.18.0150	1.14964e+15	514	LinJ.28.2750	3.41306e+16	514	LinJ.33.1960	4.26552e+15
515	LbrM.23.1520	1.32734e+16	515	LbrM.24.2370	2.58852e+16	515	LbrM.27.0660	3.64727e+16	515	LinJ.31.2210	1.14526e+16	515	LinJ.31.3080	3.36621e+16	515	LinJ.23.0280	4.24829e+15
516	LbrM.35.2970	1.32375e+16	516	LbrM.33.0760	2.54826e+16	516	LbrM.20.3330	3.63244e+16	516	LinJ.05.0350	1.10476e+16	516	LinJ.25.0130	3.36181e+15	516	LinJ.20.1370	4.24699e+15
517	LbrM.35.2030	1.27993e+16	517	LbrM.35.7280	2.54689e+15	517	LbrM.19.0080	3.60529e+15	517	LinJ.16.0040	1.08777e+16	517	LinJ.25.0940	3.34268e+15	517	LinJ.14.1100	4.24483e+15
518	LbrM.09.0180	1.27167e+16	518	LbrM.20.2830	2.54104e+16	518	LbrM.31.2940	3.60156e+15	518	LinJ.10.0560	1.06446e+16	518	LinJ.19.0310	3.33662e+15	518	LinJ.25.1500	4.23742e+15
519	LbrM.11.0990	1.2334e+16	519	LbrM.21.1280	2.53916e+16	519	LbrM.20.0540	3.59959e+15	519	LinJ.13.1350	1.06339e+15	519	LinJ.32.0520	3.29853e+15	519	LinJ.19.0330	4.23728e+15
520	LbrM.20.0660	1.23333e+16	520	LbrM.13.1050	2.53579e+16	520	LbrM.25.1100	3.57236e+15	520	LinJ.27.1450	1.05969e+16	520	LinJ.30.0640	3.28213e+15	520	LinJ.03.0790	4.23399e+15
521	LbrM.10.1410	1.22533e+16	521	LbrM.18.1610	2.53242e+16	521	LbrM.02.0390	3.56972e+16	521	LinJ.30.2430	1.04873e+16	521	LinJ.25.0630	3.26318e+16	521	LinJ.32.2540	4.23133e+15
522	LbrM.24.1350	1.21522e+16	522	LbrM.07.0290	2.53046e+16	522	LbrM.32.2240	3.5577e+15	522	LinJ.17.1450	1.00662e+15	522	LinJ.30.3290	3.24024e+15	522	LinJ.01.0430	4.23105e+15
523	LbrM.30.3620	1.20919e+15	523	LbrM.04.0780	2.50496e+16	523	LbrM.08.0810	3.52348e+16	523	LinJ.04.1250	10.0	523	LinJ.36.1320	3.23921e+16	523	LinJ.07.0280	4.23081e+15
524	LbrM.19.1230	1.19167e+16	524	LbrM.28.1300	2.4988e+16	524	LbrM.34.2630	3.47036e+16	524	LinJ.16.1390	9.94916e+15	524	LinJ.18.1230	3.23732e+16	524	LinJ.22.1530	4.228e+15
525	LbrM.26.0410	1.18662e+15	525	LbrM.27.2650	2.49616e+16	525	LbrM.07.0360	3.46299e+15	525	LinJ.04.0550	991884621050218	525	LinJ.35.0410	3.20386e+16	525	LinJ.32.4040	4.228e+15
526	LbrM.19.0140	1.16406e+16	526	LbrM.18.0640	2.4925e+16	526	LbrM.15.0090	3.44965e+16	526	LinJ.26.1220	9.84966e+15	526	LinJ.02.0710	3.20167e+16	526	LinJ.07.0910	4228.0
527	LbrM.16.1360	1.15939e+16	527	LbrM.19.1800	2.46029e+15	527	LbrM.25.1770	3.44258e+15	527	LinJ.17.0990	9.81461e+15	527	LinJ.35.5300	3.19428e+16	526	LinJ.09.1100	4228.0
528	LbrM.30.3170	1.14147e+16	528	LbrM.29.2470	2.44194e+15	528	LbrM.35.6590	3.44148e+16	528	LinJ.07.0790	9.59094e+15	528	LinJ.21.1820	3.18824e+16	526	LinJ.36.1800	4228.0
529	LbrM.06.0350	1.12744e+16	529	LbrM.32.4110	2.4316e+16	529	LbrM.35.1390	3.43957e+16	529	LinJ.12.0490	944488711383673	529	LinJ.30.0850	3.159e+16	526	LinJ.27.2440	4228.0
530	LbrM.32.0850	1.07404e+16	530	LbrM.30.1590	2.42923e+16	530	LbrM.29.0070	3.38274e+16	530	LinJ.31.2570	8.7978e+15	530	LinJ.35.1450	312616797623823	526	LinJ.30.0150	4228.0
531	LbrM.32.0130	1.00396e+16	531	LbrM.30.2560	2.42677e+16	531	LbrM.22.0510	3.37649e+16	531	LinJ.29.1790	8.66667e+15	531	LinJ.36.7060	3.11187e+15	526	LinJ.05.0140	4228.0
532	LbrM.33.1290	987966237910015	532	LbrM.27.1800	2.41272e+15	532	LbrM.24.0790	3.37053e+15	532	LinJ.35.2150	8.51427e+15	532	LinJ.13.1400	3.10222e+16	532	LinJ.02.0710	4.18646e+15
533	LbrM.35.5610	9.80963e+15	533	LbrM.32.0530	2.40098e+16	533	LbrM.27.1230	3.36513e+16	533	LinJ.32.3810	8.20152e+15	533	LinJ.03.0070	3.08192e+16	533	LinJ.25.2290	418549157548064
534	LbrM.04.0370	969844569488532	534	LbrM.06.0350	2.39953e+16	534	LbrM.08.0600	3.35426e+15	534	LinJ.35.2250	8.16141e+15	534	LinJ.30.0130	3.07024e+16	534	LinJ.22.0440	4.18268e+15
535	LbrM.35.6570	9.55934e+15	535	LbrM.21.1320	2.38846e+15	535	LbrM.17.1560	3.33771e+15	535	LinJ.16.1380	8.06242e+15	535	LinJ.27.2390	3.03073e+16	535	LinJ.31.2890	4.15855e+15
536	LbrM.30.1090	9.35246e+15	536	LbrM.28.2790	2.37242e+16	536	LbrM.31.3340	331571566777451	536	LinJ.26.0040	7.96724e+15	536	LinJ.17.0250	302121643697217	536	LinJ.15.0090	4.14601e+15
537	LbrM.15.0040	9.33838e+15	537	LbrM.17.0070	2.37214e+15	537	LbrM.29.2720	3.31206e+16	537	LinJ.05.0970	7.9208e+15	537	LinJ.03.0380	3.02067e+16	537	LinJ.28.3000	4.11256e+15
538	LbrM.32.3210	9.33585e+15	538	LbrM.25.0130	2.35498e+15	538	LbrM.35.6110	330671514983991	538	LinJ.36.2260	7.90399e+15	538	LinJ.28.1700	2.99362e+16	538	LinJ.35.5200	4.08279e+16
539	LbrM.11.1030	9.2924e+15	539	LbrM.10.0310	2.34864e+16	539	LbrM.07.0270	3.25889e+16	539	LinJ.36.6280	7.66679e+15	539	LinJ.21.1320	2.98696e+15	539	LinJ.11.0510	4.06314e+16
540	LbrM.01.0190	9.28571e+15	540	LbrM.30.3430	2.34367e+16	540	LbrM.35.7120	323257404744671	540	LinJ.16.0680	7.37776e+15	540	LinJ.19.0090	2.98498e+16	540	LinJ.30.3650	4.06046e+16
541	LbrM.35.6910	9.13667e+15	541	LbrM.32.0470	2.30253e+16	541	LbrM.24.0370	3.21775e+16	541	LinJ.34.1930	7.37158e+15	541	LinJ.19.0950	2.98051e+15	541	LinJ.27.1520	4.06018e+16
542	LbrM.34.2990	8.76203e+15	542	LbrM.19.1110	2.27621e+16	542	LbrM.19.0410	3.20995e+15	542	LinJ.19.0710	7.34088e+15	542	LinJ.15.1630	2.97964e+16	542	LinJ.33.1470	4.0564e+15
543	LbrM.09.0850	867679617084372	543	LbrM.29.2480	2.27595e+16	543	LbrM.30.2590	3.18966e+16	543	LinJ.34.0330	7.31881e+15	543	LinJ.22.0120	2.97731e+16	543	LinJ.28.0730	4.02568e+16
544	LbrM.35.4230	8.3917e+15	544	LbrM.23.0700	2.27437e+16	544	LbrM.30.3300	3.1865e+15	544	LinJ.09.1180	7.30056e+15	544	LinJ.34.0510	2.95565e+15	544	LinJ.15.0990	4.01913e+15
545	LbrM.31.3150	8.35065e+15	545	LbrM.32.4160	2.27307e+16	545	LbrM.07.0900	3.17127e+16	545	LinJ.09.1530	7.16516e+16	545	LinJ.33.2020	2.95348e+16	545	LinJ.24.2380	398396921683715
546	LbrM.06.0720	8.0	546	LbrM.35.3700	2.2514e+16	546	LbrM.34.5270	3.16769e+16	546	LinJ.11.1160	7.11144e+15	546	LinJ.11.1160	2.94946e+16	546	LinJ.32.0460	3.98393e+16
547	LbrM.35.0310	7.99382e+15	547	LbrM.35.6720	2.23742e+16	547	LbrM.03.0090	3.15781e+16	547	LinJ.29.0260	6.71213e+15	547	LinJ.16.1640	2.92359e+16	547	LinJ.35.3900	3.94046e+15
548	LbrM.29.1240	7.75997e+15	548	LbrM.23.0050	2.22679e+15	548	LbrM.20.2040	3.14834e+15	548	LinJ.35.3130	6.63612e+15	548	LinJ.34.3030	2.91178e+15	548	LinJ.36.1730	3.93028e+16
549	LbrM.15.0050	7.67241e+15	549	LbrM.20.2940	2.22661e+15	549	LbrM.35.5070	3.14147e+16	549	LinJ.36.5590	6.42313e+15	549	LinJ.25.1160	2.90368e+16	549	LinJ.03.0590	3.9282e+15
550	LbrM.20.2950	7.65588e+15	550	LbrM.22.1170	2.21011e+15	550	LbrM.35.2490	3.13658e+16	550	LinJ.11.0180	6.23355e+15	550	LinJ.33.0870	2.90052e+15	550	LinJ.19.0050	3.90167e+16
551	LbrM.17.0880	7.32753e+15	551	LbrM.20.0030	220719639674217	551	LbrM.28.2890	3.13053e+16	551	LinJ.36.4180	6.17877e+15	551	LinJ.36.6220	2.89694e+16	551	LinJ.23.1920	3.87281e+16
552	LbrM.03.0450	7.12877e+15	552	LbrM.23.0400	2.20533e+15	552	LbrM.20.2340	3.12762e+16	552	LinJ.20.0110	6.04689e+15	552	LinJ.28.2000	2.87589e+15	552	LinJ.27.2250	3.8596e+16
553	LbrM.25.2050	7.10644e+15	553	LbrM.28.2580	2.18149e+16	553	LbrM.33.1020	3.11918e+16	553	LinJ.08.0960	5.8e+15	553	LinJ.27.1570	2.86223e+16	553	LinJ.14.0350	3.78878e+16
554	LbrM.20.1500	7.06926e+16	554	LbrM.33.0840	2.1769e+16	554	LbrM.34.3160	3.11383e+16	554	LinJ.33.1840	5.62326e+15	554	LinJ.18.0460	2.84835e+16	554	LinJ.31.2670	3.74548e+16
555	LbrM.01.0060	7.01601e+15	555	LbrM.25.0860	2.16921e+16	555	LbrM.30.3280	3.10115e+15	555	LinJ.36.5010	5.34883e+15	555	LinJ.19.1570	2.829e+16	555	LinJ.11.1160	3.73529e+15
556	LbrM.27.1150	7.0	556	LbrM.27.2690	2.14884e+16	556	LbrM.35.1840	3.09213e+15	556	LinJ.33.2280	5.11613e+15	556	LinJ.21.1580	2.81963e+15	556	LinJ.32.3470	3.7341e+15
556	LbrM.11.1060	7.0	557	LbrM.35.2820	2.14857e+16	557	LbrM.34.4810	3.07862e+16	557	LinJ.20.1020	5.00929e+16	557	LinJ.06.1330	2.81483e+15	557	LinJ.10.0310	3.73297e+15
558	LbrM.20.5530	6.82079e+15	558	LbrM.05.0470	2.12532e+16	558	LbrM.33.2190	3.07201e+15	558	LinJ.33.0320	5.0	558	LinJ.28.2780	2.78393e+15	558	LinJ.15.0030	3.73066e+15
559	LbrM.18.1050	6.62244e+15	559	LbrM.28.0250	2.11981e+16	559	LbrM.19.1360	3.05909e+15	559	LinJ.36.2780	4.69284e+15	559	LinJ.11.0600	2.78347e+15	559	LinJ.33.1010	3.72904e+16
560	LbrM.17.0090	6.53466e+15	560	LbrM.24.0690	2.10356e+15	560	LbrM.28.1740	3.0478e+15	560	LinJ.25.0750	4.68258e+15	560	LinJ.17.1530	2.77347e+16	560	LinJ.34.0630	3.6783e+16
561	LbrM.06.0100	6.48074e+15	561	LbrM.30.3550	2.06728e+16	561	LbrM.34.3660	3.04567e+15	560	LinJ.25.0740	4.68258e+15	561	LinJ.03.0590	2.77095e+16	561	LinJ.13.0260	3.67728e+16
562	LbrM.32.2860	6.40271e+15	562	LbrM.06.0030	2.05747e+15	562	LbrM.32.1050	3.02012e+16	562	LinJ.26.1970	4.5116e+15	562	LinJ.07.1210	2.76463e+15	562	LinJ.34.2160	3.67021e+16
563	LbrM.03.0140	5.49261e+15	563	LbrM.34.3440	2.04708e+16	563	LbrM.19.0630	3.00604e+16	563	LinJ.28.2970	4.20811e+16	563	LinJ.18.1570	2.7389e+15	563	LinJ.22.1480	3.66897e+16
564	LbrM.19.1860	5.41325e+16	564	LbrM.20.0090	2.01474e+16	564	LbrM.31.1450	2.9939e+16	563	LinJ.28.2940	4.20811e+16	564	LinJ.34.3130	2.73081e+15	564	LinJ.10.0750	3.66478e+16
565	LbrM.22.0720	525194216515725	565	LbrM.34.2630	2.01444e+16	565	LbrM.05.0350	2.9897e+15	565	LinJ.16.0950	4.08571e+15	565	LinJ.36.7240	2.68626e+16	565	LinJ.28.0940	3.66001e+16
566	LbrM.20.1670	4.69957e+15	566	LbrM.33.1650	2.00858e+16	566	LbrM.22.0550	2.97276e+16	566	LinJ.36.6950	4.0	566	LinJ.32.3460	2.66485e+16	566	LinJ.34.3530	3.64129e+15
567	LbrM.35.7240	4.39056e+15	567	LbrM.06.0120	2.00717e+16	567	LbrM.05.0030	2.96761e+15	567	LinJ.34.0170	3.90267e+16	567	LinJ.24.0690	2.66261e+16	567	LinJ.06.0140	3.60938e+16
568	LbrM.20.2330	436404592332579	568	LbrM.31.0720	1.99542e+16	568	LbrM.31.2550	2.96277e+16	568	LinJ.25.0760	3.8992e+16	568	LinJ.19.0800	2.64852e+15	568	LinJ.36.1320	3.59192e+16
569	LbrM.30.2070	4.02581e+15	569	LbrM.24.0920	199077169031749	569	LbrM.30.3180	2.96006e+16	569	LinJ.23.1220	3.88106e+15	569	LinJ.21.2150	2.64431e+15	569	LinJ.36.5050	356278869712528
570	LbrM.20.0760	3.81151e+15	570	LbrM.35.3670	1.97248e+16	570	LbrM.32.0520	2.95894e+16	570	LinJ.06.1240	3.79123e+16	570	LinJ.30.2600	2.63363e+15	570	LinJ.09.0820	3.52807e+15
571	LbrM.10.0200	3.74908e+16	571	LbrM.15.1030	1.97123e+16	571	LbrM.32.0650	2.95067e+15	571	LinJ.30.3150	3.76636e+15	571	LinJ.28.1310	2.62681e+16	571	LinJ.07.0240	3.49754e+15
572	LbrM.16.1370	3.73951e+16	572	LbrM.34.4230	1.94854e+15	572	LbrM.18.0170	2.94474e+16	572	LinJ.15.1530	3.75985e+16	572	LinJ.18.0580	2.61187e+15	572	LinJ.35.2780	3.49056e+15
573	LbrM.35.4140	3.50546e+15	573	LbrM.21.1000	1.94751e+16	573	LbrM.29.0080	2.93579e+16	573	LinJ.31.2700	3.68258e+16	573	LinJ.35.5180	2.60534e+16	573	LinJ.10.0540	3.48385e+16
574	LbrM.31.3590	3.32176e+16	574	LbrM.26.0030	1.92039e+15	574	LbrM.20.2830	2.92819e+16	574	LinJ.33.1430	3.67893e+16	574	LinJ.22.1480	2.59464e+15	574	LinJ.30.1550	3.47445e+16
575	LbrM.35.6550	32638977245479	575	LbrM.31.3310	1.89754e+16	575	LbrM.35.1950	2.92771e+16	575	LinJ.22.1380	3.60588e+15	575	LinJ.06.0370	2.5849e+15	575	LinJ.25.1160	3.46199e+15
576	LbrM.30.2320	3.09902e+15	576	LbrM.23.1030	1.89615e+16	576	LbrM.19.0370	289509181761311	576	LinJ.32.3230	3.6e+16	576	LinJ.30.1550	2.57684e+16	576	LinJ.36.7200	3.45453e+16
577	LbrM.12.0080	3.03102e+16	577	LbrM.22.0030	1.887e+16	577	LbrM.27.1750	2.8875e+15	577	LinJ.20.1350	3.48958e+16	577	LinJ.36.0920	2.51614e+16	577	LinJ.11.0410	3.41803e+16
578	LbrM.06.0570	2.84805e+15	578	LbrM.34.4850	1.88582e+16	578	LbrM.34.1360	2.88276e+15	578	LinJ.23.1660	3.46291e+15	578	LinJ.04.0460	2.48364e+15	578	LinJ.28.2880	3.41677e+15
579	LbrM.05.1140	2.69842e+15	579	LbrM.35.0980	1.88274e+16	579	LbrM.18.0920	2.87072e+15	579	LinJ.01.0030	3.39459e+16	579	LinJ.27.1170	2.47942e+16	579	LinJ.34.3990	3.38423e+16
580	LbrM.29.1210	2.32641e+15	580	LbrM.33.1360	1.8804e+16	580	LbrM.19.1800	2.86974e+15	580	LinJ.06.0580	3.25546e+16	580	LinJ.04.0810	2.47041e+16	580	LinJ.19.1200	3.35115e+15
581	LbrM.15.0920	2.26452e+16	581	LbrM.05.0200	1.8754e+16	581	LbrM.29.0940	2.85344e+16	581	LinJ.10.1430	3.17786e+15	581	LinJ.15.1050	2.45471e+15	581	LinJ.03.0380	3.32302e+15
582	LbrM.31.2790	2.01378e+16	582	LbrM.28.1900	1.85319e+16	582	LbrM.11.0970	2.84734e+15	582	LinJ.36.0560	3.16901e+15	582	LinJ.36.3630	2.45441e+16	582	LinJ.36.6530	3.32186e+16
583	LbrM.12.0480	2.0	583	LbrM.07.1110	1.84376e+15	583	LbrM.21.0610	2.84721e+15	583	LinJ.15.0050	2.95038e+15	583	LinJ.35.4430	2.45211e+16	583	LinJ.36.4570	3.30275e+15
584	LbrM.31.0190	1.96833e+15	584	LbrM.29.0730	1.84304e+16	584	LbrM.35.7100	2.84598e+15	584	LinJ.29.0520	2.67044e+15	584	LinJ.35.4540	2.45075e+16	584	LinJ.35.1450	3.29922e+16
585	LbrM.26.1070	1.92257e+16	585	LbrM.35.2270	1.82847e+16	585	LbrM.06.0940	2.82609e+15	585	LinJ.35.0240	2.66513e+15	585	LinJ.10.0310	2.4453e+15	585	LinJ.24.1570	3.29647e+15
586	LbrM.34.5270	1.83269e+16	586	LbrM.35.1950	1.81496e+16	586	LbrM.21.1280	2.81983e+16	586	LinJ.35.4010	2.46049e+15	586	LinJ.29.2610	2.43267e+15	586	LinJ.05.0550	3.2873e+15
587	LbrM.20.5520	1.72836e+16	587	LbrM.27.1970	1.81058e+16	587	LbrM.20.0010	2.74848e+16	587	LinJ.33.1350	2.45361e+15	587	LinJ.23.1120	2.40582e+16	587	LinJ.36.3570	3.27931e+16
588	LbrM.17.0080	1.50959e+16	588	LbrM.20.0540	1.8042e+16	588	LbrM.07.0090	2.735e+16	588	LinJ.36.7060	2.24414e+15	588	LinJ.28.1470	2.39828e+16	588	LinJ.03.0070	3.27628e+16
589	LbrM.32.3200	1.4454e+16	589	LbrM.19.1710	1.80149e+16	589	LbrM.29.2360	2.73239e+16	589	LinJ.02.0020	2.18858e+16	589	LinJ.27.1970	2.39543e+15	589	LinJ.15.1630	3.26842e+15
590	LbrM.35.4930	1.31762e+16	590	LbrM.34.4340	1.79271e+16	590	LbrM.03.0820	2.71858e+15	590	LinJ.36.1220	2.14491e+16	590	LinJ.29.2620	2.36651e+16	590	LinJ.35.1030	3.25915e+15
591	LbrM.34.3070	1.21049e+16	591	LbrM.18.0620	1.79172e+16	591	LbrM.30.2790	2.69716e+15	591	LinJ.15.1550	2.1429e+16	591	LinJ.31.0580	2.36058e+16	591	LinJ.34.4180	3.25068e+16
592	LbrM.31.2840	1.01905e+15	592	LbrM.09.0850	1.79103e+16	592	LbrM.14.0350	2.69175e+15	592	LinJ.07.0180	9125-01-01	592	LinJ.21.1330	2.35441e+16	592	LinJ.13.0220	3.2474e+16
593	LbrM.33.0520	1.0	593	LbrM.35.1750	1.77084e+16	593	LbrM.30.0140	2.66666e+15	593	LinJ.21.0720	1.90315e+16	593	LinJ.25.1010	2.34878e+15	593	LinJ.22.0450	3.24078e+15
594	LbrM.17.1370	8.8992e+15	594	LbrM.18.0170	1.77067e+16	594	LbrM.29.2120	2.66304e+16	594	LinJ.34.0830	1.82593e+16	594	LinJ.31.3170	2.32262e+16	594	LinJ.35.0770	3.22238e+16
595	LbrM.27.0810	852584759205057	595	LbrM.35.4020	1762.0	595	LbrM.10.0990	2.6485e+16	595	LinJ.10.1400	1.7811e+16	595	LinJ.28.0240	2.3217e+16	595	LinJ.08.0010	3.2196e+16
596	LbrM.20.0860	8.51571e+15	595	LbrM.20.4820	1762.0	596	LbrM.17.0840	2.64333e+16	596	LinJ.19.1660	1.72613e+16	596	LinJ.36.1920	2.28116e+15	596	LinJ.09.0980	3.2126e+16
597	LbrM.31.2190	8.04146e+15	595	LbrM.20.4210	1762.0	596	LbrM.20.5280	2.64333e+16	597	LinJ.36.2890	1.72259e+16	597	LinJ.09.0820	2.26581e+16	597	LinJ.36.7060	3.21106e+15
598	LbrM.19.0290	770909090909091	595	LbrM.03.0880	1762.0	596	LbrM.24.2090	2.64333e+16	598	LinJ.34.0940	1.68571e+16	598	LinJ.34.0630	2.26374e+15	598	LinJ.17.0250	3.18503e+16
599	LbrM.02.0390	755601228830374	599	LbrM.03.0110	1.7594e+16	599	LbrM.13.0020	2.63676e+15	599	LinJ.31.2580	1.59633e+16	599	LinJ.29.2940	2.26217e+15	599	LinJ.29.0860	3.18466e+15
600	LbrM.09.1530	7.16667e+15	600	LbrM.30.3070	1.7536e+16	600	LbrM.28.2050	2.63124e+16	600	LinJ.03.0890	1.55577e+15	600	LinJ.36.6670	2.25562e+15	600	LinJ.19.0950	3.1709e+15
601	LbrM.31.1830	5.66514e+15	601	LbrM.32.0460	1.75117e+16	601	LbrM.16.1600	2.63003e+16	601	LinJ.07.0350	1.42667e+16	601	LinJ.27.2430	2.24932e+15	601	LinJ.19.1570	3.14786e+16
602	LbrM.29.0020	4.5e+16	602	LbrM.12.0230	1.749e+16	602	LbrM.09.0850	2.62807e+16	602	LinJ.31.0860	1.25	602	LinJ.26.0020	2.2367e+16	602	LinJ.16.1640	3.11786e+15
603	LbrM.29.1230	2.95238e+16	603	LbrM.21.1920	1.72842e+16	603	LbrM.35.2820	2.62739e+16	603	LinJ.34.3140	1.15049e+15	603	LinJ.05.0460	2.23598e+16	603	LinJ.29.2250	3.11113e+15
604	LbrM.04.1220	2.22222e+15	604	LbrM.26.0170	1.72145e+16	604	LbrM.35.1290	2.62558e+15	604	LinJ.23.1470	1.13377e+16	604	LinJ.27.1730	221137192640039	604	LinJ.33.0870	3.07679e+16
605	LbrM.09.1550	7.5565e+15	605	LbrM.20.2340	1.71153e+16	605	LbrM.11.0480	2.62381e+16	605	LinJ.23.0860	9.80952e+15	605	LinJ.34.0010	2.20053e+16	605	LinJ.36.5410	3.06217e+16
605	LbrM.35.2400	7.5565e+15	606	LbrM.14.1360	1.70889e+16	606	LbrM.04.0780	2.61958e+16	606	LinJ.32.0240	7.5983e+15	606	LinJ.21.0480	2.19282e+15	606	LinJ.08.0570	3.0485e+15
607	LbrM.10.0640	6.81404e+15	607	LbrM.35.4710	1.70768e+16	607	LbrM.13.1440	2.60044e+16	607	LinJ.32.0830	7.07729e+15	607	LinJ.32.4020	2.19215e+15	607	LinJ.28.2750	3.01128e+16
608	LbrM.31.3180	0.0	608	LbrM.21.0310	1.70008e+16	608	LbrM.06.0030	2.59784e+16	608	LinJ.25.1530	6.65165e+15	608	LinJ.31.3050	2.18521e+16	608	LinJ.34.1900	2.99993e+15
608	LbrM.28.2950	0.0	609	LbrM.35.1120	1.69605e+16	609	LbrM.25.1570	2.59772e+16	609	LinJ.11.1180	6.04536e+15	609	LinJ.35.4950	2.1756e+16	609	LinJ.36.7080	2.99833e+15
608	LbrM.06.0650	0.0	610	LbrM.21.0550	1.68749e+16	610	LbrM.29.0900	2.5974e+15	609	LinJ.29.1920	6.04536e+15	610	LinJ.16.1430	2.15015e+16	610	LinJ.30.2620	2.99256e+15
608	LbrM.19.0410	0.0	611	LbrM.16.0570	1.67581e+16	611	LbrM.30.1590	2.5825e+15	611	LinJ.26.2290	5.88814e+15	611	LinJ.29.0750	2.1356e+15	611	LinJ.33.2020	2.96422e+16
608	LbrM.16.0240	0.0	612	LbrM.18.0520	1.66135e+16	612	LbrM.07.0960	2.56833e+16	612	LinJ.34.3810	5.644e+15	612	LinJ.36.6860	2.12878e+16	612	LinJ.21.2240	2.95945e+16
608	LbrM.32.0710	0.0	613	LbrM.26.1590	1.65881e+15	613	LbrM.06.0350	2.56365e+15	613	LinJ.18.0510	5.56554e+15	613	LinJ.13.1180	2.12483e+15	613	LinJ.30.3290	2.94132e+16
608	LbrM.29.2850	0.0	614	LbrM.30.2950	1.65418e+16	614	LbrM.34.2390	2.54442e+15	614	LinJ.17.0110	5.13948e+15	614	LinJ.34.0150	2.11314e+15	614	LinJ.19.0310	2.93581e+15
608	LbrM.27.0881	0.0	615	LbrM.27.2560	1.64361e+15	615	LbrM.18.0640	2.53968e+16	615	LinJ.14.0920	4.97758e+16	615	LinJ.06.0030	2.11129e+15	615	LinJ.31.2980	2.93432e+16
608	LbrM.26.2630	0.0	616	LbrM.16.0940	1.64241e+16	616	LbrM.35.4710	2.53386e+15	616	LinJ.18.0290	4.7256e+15	616	LinJ.19.0420	2.11107e+16	616	LinJ.35.3300	2.93149e+16
608	LbrM.32.0910	0.0	617	LbrM.10.0110	1.62857e+15	617	LbrM.20.3970	2.53084e+15	617	LinJ.35.4060	4.70092e+15	617	LinJ.26.0150	21082291685879	617	LinJ.30.3230	2.92562e+16
608	LbrM.05.0070	0.0	618	LbrM.01.0080	1.62153e+16	618	LbrM.17.1550	2.52772e+15	618	LinJ.06.0990	3.50108e+15	618	LinJ.30.3440	2.08229e+16	618	LinJ.30.2530	2.92516e+16
608	LbrM.32.2570	0.0	619	LbrM.19.0080	1.61282e+16	619	LbrM.15.0030	2.52366e+16	619	LinJ.36.4640	3.13131e+16	619	LinJ.13.1360	207166343672386	619	LinJ.36.3250	2.92301e+16
608	LbrM.19.1750	0.0	620	LbrM.35.4040	1.61246e+16	620	LbrM.01.0690	2.52061e+16	620	LinJ.19.0910	2.94486e+16	620	LinJ.31.1770	206057054618286	620	LinJ.36.1670	2.90856e+16
608	LbrM.35.3910	0.0	621	LbrM.34.1120	1.60455e+16	621	LbrM.34.5160	2.51053e+16	621	LinJ.35.0370	2.36536e+16	621	LinJ.30.2480	2.04776e+16	621	LinJ.28.1700	2.90304e+16
608	LbrM.34.3470	0.0	622	LbrM.23.1530	1.60107e+16	622	LbrM.28.1300	2.49438e+16	622	LinJ.32.3460	1.34657e+16	622	LinJ.30.1420	2.04142e+16	622	LinJ.18.1230	2.8813e+16
608	LbrM.33.1690	0.0	623	LbrM.26.2600	1.59873e+15	623	LbrM.11.0370	2.49393e+16	623	LinJ.31.1150	1.00248e+16	623	LinJ.21.0990	203492690308918	623	LinJ.10.0960	2.87765e+15
608	LbrM.28.0120	0.0	624	LbrM.35.0310	1.56603e+15	624	LbrM.28.0570	249028939549539	624	LinJ.23.1980	4.66248e+16	624	LinJ.30.3350	2.02915e+15	624	LinJ.35.0410	2.87403e+15
608	LbrM.03.0050	0.0	624	LbrM.22.1310	1.56603e+15	625	LbrM.25.2130	2.47233e+16	625	LinJ.06.0630	0.0	625	LinJ.10.0090	2.02836e+16	625	LinJ.21.1580	2.87084e+15
608	LbrM.21.0900	0.0	624	LbrM.10.0990	1.56603e+15	626	LbrM.28.2790	2.44455e+16	625	LinJ.14.1240	0.0	626	LinJ.30.2540	2.01841e+16	626	LinJ.15.0170	2.83593e+15
608	LbrM.26.1230	0.0	624	LbrM.07.1080	1.56603e+15	627	LbrM.25.0130	2.42272e+16	625	LinJ.32.1760	0.0	627	LinJ.18.0560	2.00379e+16	627	LinJ.35.4910	2.82947e+15
608	LbrM.22.1540	0.0	628	LbrM.13.0880	1.55402e+15	628	LbrM.29.2670	2.40877e+15	625	LinJ.25.2550	0.0	628	LinJ.35.2780	2.00183e+16	628	LinJ.32.3460	2.81528e+16
608	LbrM.24.0650	0.0	629	LbrM.27.1010	1.54942e+16	629	LbrM.27.1800	2.39691e+15	625	LinJ.17.0880	0.0	629	LinJ.32.0410	1.99994e+15	629	LinJ.19.0090	2.79729e+15
608	LbrM.16.0010	0.0	630	LbrM.20.0830	1.53857e+16	630	LbrM.32.4110	2.39293e+16	625	LinJ.05.0420	0.0	630	LinJ.30.1570	1.97589e+16	630	LinJ.20.1660	2.78236e+16
608	LbrM.32.0470	0.0	631	LbrM.33.1160	1.53345e+16	631	LbrM.35.2580	2.37955e+16	625	LinJ.07.1180	0.0	631	LinJ.19.0390	1.97203e+16	631	LinJ.32.4070	2.7822e+16
608	LbrM.35.2820	0.0	632	LbrM.05.0410	1.52737e+16	632	LbrM.35.3760	2.36973e+15	625	LinJ.06.0760	0.0	632	LinJ.35.4320	1.96252e+16	632	LinJ.36.0280	2.77962e+16
608	LbrM.28.2670	0.0	633	LbrM.26.0840	1.50465e+16	633	LbrM.35.0620	2.36831e+15	625	LinJ.26.2250	0.0	633	LinJ.23.1680	1.95673e+16	633	LinJ.23.0820	2.77766e+15
608	LbrM.23.0050	0.0	634	LbrM.35.3300	1.49163e+16	634	LbrM.19.0650	2.36148e+16	625	LinJ.02.0330	0.0	634	LinJ.36.4690	1.94818e+16	634	LinJ.30.2470	2.77189e+16
608	LbrM.07.1080	0.0	635	LbrM.30.3340	1.4735e+16	635	LbrM.33.0840	2.35957e+16	625	LinJ.34.0820	0.0	635	LinJ.01.0050	1.92748e+16	635	LinJ.18.0990	2.76214e+15
608	LbrM.34.4690	0.0	636	LbrM.18.1050	1.46209e+16	636	LbrM.34.3140	2.35647e+16	625	LinJ.21.0280	0.0	636	LinJ.10.0430	1.92461e+15	636	LinJ.06.0030	2.73753e+16
608	LbrM.16.0950	0.0	637	LbrM.35.4770	1.45092e+16	637	LbrM.35.6720	2.35322e+16	625	LinJ.14.0130	0.0	637	LinJ.17.0070	1.91654e+16	637	LinJ.30.2600	2.72779e+15
608	LbrM.28.3070	0.0	638	LbrM.26.0190	1.42413e+16	638	LbrM.20.3790	2.34593e+16	625	LinJ.29.2470	0.0	638	LinJ.05.0200	190679103216772	638	LinJ.35.3730	2.71217e+16
608	LbrM.06.1150	0.0	639	LbrM.34.3820	1.4045e+16	639	LbrM.35.2040	2.33151e+16	625	LinJ.25.2280	0.0	639	LinJ.26.1550	1.90144e+15	639	LinJ.21.2050	2.70001e+16
608	LbrM.21.0720	0.0	640	LbrM.32.0980	1.39613e+15	640	LbrM.16.0300	2.32994e+15	625	LinJ.36.0450	0.0	640	LinJ.32.0400	1.8904e+16	640	LinJ.22.0490	2.68138e+15
608	LbrM.28.2870	0.0	641	LbrM.35.5670	1.3796e+15	641	LbrM.05.0470	2.30815e+15	625	LinJ.36.2490	0.0	641	LinJ.28.2550	1.8694e+15	641	LinJ.31.3080	2.68104e+16
608	LbrM.06.0890	0.0	642	LbrM.29.0160	1.37803e+16	642	LbrM.18.1050	2.29331e+16	625	LinJ.21.0890	0.0	642	LinJ.28.1850	1.85912e+16	642	LinJ.35.0130	2.67685e+16
608	LbrM.23.0800	0.0	643	LbrM.33.0890	1.37725e+16	643	LbrM.27.2690	2.28017e+16	625	LinJ.28.1490	0.0	643	LinJ.32.0720	1.85675e+16	643	LinJ.28.2780	2.66516e+16
608	LbrM.20.0090	0.0	644	LbrM.20.3140	1.3726e+15	644	LbrM.16.0550	2.27209e+15	625	LinJ.36.0280	0.0	644	LinJ.15.0220	1.82964e+16	644	LinJ.29.2940	2.65513e+15
608	LbrM.31.2120	0.0	645	LbrM.28.2270	1.37111e+15	645	LbrM.14.1560	2.27042e+16	625	LinJ.32.3100	0.0	645	LinJ.04.1140	1.82841e+16	645	LinJ.03.0520	264493670285934
608	LbrM.31.2280	0.0	646	LbrM.22.1040	1.36396e+15	646	LbrM.10.1270	2.22753e+15	625	LinJ.31.2920	0.0	646	LinJ.36.1000	1.82609e+16	646	LinJ.31.1650	2.62581e+16
608	LbrM.34.0810	0.0	647	LbrM.35.1570	1.36383e+16	647	LbrM.20.0090	2.21321e+15	625	LinJ.17.0250	0.0	647	LinJ.05.0550	1.82057e+16	647	LinJ.22.0880	2.62261e+15
			648	LbrM.18.1230	1.35317e+16	648	LbrM.35.1480	2.21194e+15	625	LinJ.26.1030	0.0	648	LinJ.36.1060	1.81965e+16	648	LinJ.35.2490	2.60592e+15
			649	LbrM.30.1610	135239833052028	649	LbrM.20.3980	2.19914e+15	625	LinJ.09.1550	0.0	649	LinJ.36.3600	1.81952e+16	649	LinJ.30.0130	2.56644e+16
			650	LbrM.18.1180	1.34603e+15	650	LbrM.28.2580	2.18672e+15	625	LinJ.35.2930	0.0	650	LinJ.36.2480	1.8055e+16	650	LinJ.27.0790	2.56409e+16
			651	LbrM.02.0410	1.33469e+16	651	LbrM.25.0860	2.1851e+16	625	LinJ.28.2920	0.0	651	LinJ.33.0480	1.79708e+16	651	LinJ.28.0580	2.56112e+16
			652	LbrM.31.3560	1.32326e+15	652	LbrM.12.0240	2.18095e+16	625	LinJ.24.2120	0.0	652	LinJ.06.0140	1.78341e+16	652	LinJ.32.0600	2.55739e+16
			653	LbrM.22.1260	1.32066e+16	653	LbrM.26.0030	2.15021e+16	625	LinJ.27.0670	0.0	653	LinJ.14.1270	1.76378e+16	653	LinJ.36.5400	2.54364e+15
			654	LbrM.18.1520	1.3199e+15	654	LbrM.32.0470	2.1481e+16	625	LinJ.28.0250	0.0	654	LinJ.21.0550	1.76073e+16	654	LinJ.05.0030	2.54322e+15
			655	LbrM.34.1140	1.31165e+16	655	LbrM.27.2650	2.1464e+16	625	LinJ.36.3000	0.0	655	LinJ.06.0430	1.75658e+16	655	LinJ.25.1010	2.53695e+16
			656	LbrM.22.1240	1.29897e+16	656	LbrM.35.7280	2.13977e+16	625	LinJ.36.0250	0.0	656	LinJ.35.1210	1.74673e+16	656	LinJ.36.0920	2.53626e+15
			657	LbrM.34.1990	1.29418e+16	657	LbrM.08.0330	2.1295e+16	625	LinJ.29.1240	0.0	657	LinJ.03.0040	1.74312e+16	657	LinJ.21.0990	2.52251e+15
			658	LbrM.12.0040	1.29104e+16	658	LbrM.20.4010	2.0957e+16	625	LinJ.34.0140	0.0	658	LinJ.36.7200	1.72332e+16	658	LinJ.01.0500	2.52178e+15
			659	LbrM.31.1980	1.28927e+16	659	LbrM.35.3700	2.09142e+16	625	LinJ.35.4070	0.0	659	LinJ.22.1230	1.72306e+15	659	LinJ.11.0600	2.49019e+16
			660	LbrM.29.2640	1.28674e+16	660	LbrM.33.1650	2.08954e+15	625	LinJ.01.0140	0.0	660	LinJ.14.0140	1.71369e+16	660	LinJ.28.2000	2.47692e+15
			661	LbrM.28.1420	1.27443e+15	661	LbrM.20.0030	2.0565e+16	625	LinJ.33.1730	0.0	661	LinJ.35.3560	1.71095e+16	661	LinJ.13.1320	2.47464e+16
			662	LbrM.34.4810	1.27338e+15	662	LbrM.22.0030	2.04204e+16	625	LinJ.31.0060	0.0	662	LinJ.03.0090	1.70916e+15	662	LinJ.32.3040	2.47338e+15
			663	LbrM.26.1270	1.27288e+16	663	LbrM.17.1470	2.0338e+15	625	LinJ.26.0780	0.0	663	LinJ.27.2300	1.68432e+16	663	LinJ.18.0580	246942648787319
			664	LbrM.20.1760	1.27211e+16	664	LbrM.13.1520	2.0239e+15	625	LinJ.15.0200	0.0	664	LinJ.26.0180	1.68089e+16	664	LinJ.04.0550	2.46225e+15
			665	LbrM.35.2030	1.25601e+16	665	LbrM.21.1320	2.00233e+16	625	LinJ.01.0160	0.0	665	LinJ.18.0990	1.68047e+16	665	LinJ.19.0180	2.4553e+15
			666	LbrM.34.3850	1.25289e+15	666	LbrM.15.1030	1.99128e+16	625	LinJ.06.1090	0.0	666	LinJ.11.0240	1.67563e+16	666	LinJ.21.0960	2.45193e+15
			667	LbrM.29.0760	1.24988e+16	667	LbrM.34.0170	1.98435e+16	625	LinJ.08.0320	0.0	667	LinJ.19.0170	1.66799e+15	667	LinJ.15.1100	2.42741e+16
			668	LbrM.12.0240	1.2372e+16	668	LbrM.24.0690	1.98301e+16	625	LinJ.16.1630	0.0	668	LinJ.16.0940	1.66727e+16	668	LinJ.24.0690	2.42409e+16
			669	LbrM.34.0090	1.22629e+16	669	LbrM.20.4820	1981.0	625	LinJ.06.0120	0.0	669	LinJ.18.0150	1.66126e+16	669	LinJ.34.0150	2.42276e+16
			670	LbrM.07.0960	1.21952e+16	669	LbrM.03.0880	1981.0	625	LinJ.05.0320	0.0	670	LinJ.30.3580	1.65798e+15	670	LinJ.35.4430	2.41783e+15
			671	LbrM.18.1310	1.21515e+16	669	LbrM.20.4210	1981.0	625	LinJ.01.0470	0.0	671	LinJ.12.0190	1.64002e+16	671	LinJ.36.1920	2.41584e+16
			672	LbrM.27.1600	1.20668e+16	669	LbrM.35.4020	1981.0	625	LinJ.07.1030	0.0	672	LinJ.26.0780	1.6346e+16	672	LinJ.25.0940	2.41278e+16
			673	LbrM.35.4600	1.20528e+15	673	LbrM.30.0700	1.97573e+15	625	LinJ.20.0980	0.0	673	LinJ.35.0050	1.62216e+15	673	LinJ.07.1210	2.41258e+16
			674	LbrM.35.2490	1.19725e+15	674	LbrM.29.2890	1.97518e+16	625	LinJ.35.1030	0.0	674	LinJ.05.0400	1.6169e+15	674	LinJ.27.1570	2.39868e+16
			675	LbrM.35.3320	1.1954e+16	675	LbrM.20.4190	1.97501e+15	625	LinJ.16.1100	0.0	675	LinJ.07.0250	1.60594e+15	675	LinJ.15.1050	2.39747e+16
			676	LbrM.20.3790	1.19492e+16	676	LbrM.13.1050	1.96682e+15				676	LinJ.36.3230	1.5972e+16	676	LinJ.04.0810	2.34581e+15
			677	LbrM.22.0560	1.19398e+15	677	LbrM.04.0960	1.96245e+16				677	LinJ.16.0560	1.59006e+16	677	LinJ.35.0580	2.34391e+15
			678	LbrM.22.0300	1.184e+16	678	LbrM.34.3580	1.95711e+16				678	LinJ.13.1620	1.57379e+16	678	LinJ.28.1310	2.33978e+16
			679	LbrM.05.0560	1.18109e+16	679	LbrM.19.0570	1.93956e+16				679	LinJ.26.1030	1.56826e+16	679	LinJ.30.0850	2.33537e+15
			680	LbrM.15.1050	1.17171e+16	680	LbrM.09.0980	1.93897e+15				680	LinJ.23.1400	1.55429e+16	680	LinJ.05.0460	2.33411e+16
			681	LbrM.10.0420	1.16559e+15	681	LbrM.07.0620	1.93438e+16				681	LinJ.21.1990	1.53205e+16	681	LinJ.21.2150	2.3134e+15
			682	LbrM.34.5250	1.16447e+16	682	LbrM.23.1030	1.93078e+16				682	LinJ.34.1060	1.53074e+16	682	LinJ.36.6370	2.31265e+15
			683	LbrM.23.0570	1.16285e+16	683	LbrM.08.0970	1.92744e+16				683	LinJ.27.0790	1.52604e+16	683	LinJ.27.2430	2.31011e+15
			684	LbrM.35.0600	1.15952e+16	684	LbrM.27.1390	1.92471e+16				684	LinJ.36.2380	1.52482e+16	684	LinJ.35.3370	2.30171e+15
			685	LbrM.35.1290	1.15316e+16	685	LbrM.24.0920	1.92436e+16				685	LinJ.26.0790	1.50968e+16	685	LinJ.36.6860	230090159153691
			686	LbrM.03.0060	1.15149e+16	686	LbrM.27.1970	1.9178e+16				686	LinJ.29.0160	1.50883e+15	686	LinJ.36.1410	2.29116e+16
			687	LbrM.07.0100	1.14975e+15	687	LbrM.33.0911	1.91551e+16				687	LinJ.32.0470	1.49884e+16	687	LinJ.32.0470	2.28747e+15
			688	LbrM.17.0180	1.13908e+16	688	LbrM.34.4230	1.91144e+15				688	LinJ.02.0350	1.48738e+16	688	LinJ.33.1940	2.28455e+15
			689	LbrM.11.0800	1.12146e+16	689	LbrM.33.3050	1.90918e+16				689	LinJ.18.1500	1.4843e+16	689	LinJ.36.6340	2.28126e+16
			690	LbrM.34.3260	1.11516e+16	690	LbrM.17.0180	1.90572e+16				690	LinJ.12.0003	1.47962e+15	690	LinJ.26.0020	2.27983e+15
			691	LbrM.29.2820	1.10918e+16	691	LbrM.22.1540	1.88149e+15				691	LinJ.35.1230	1.47611e+16	691	LinJ.31.2400	2.27906e+16
			692	LbrM.25.0470	1.09254e+16	692	LbrM.30.3430	1.88031e+16				692	LinJ.33.1010	1.47084e+16	692	LinJ.23.1120	2.2227e+15
			692	LbrM.09.0100	1.09254e+16	693	LbrM.32.2400	1.87526e+16				693	LinJ.01.0440	146582214565556	693	LinJ.35.5180	2.2149e+15
			694	LbrM.18.0510	1.09214e+16	694	LbrM.03.0210	1.86626e+16				694	LinJ.36.3250	1.4581e+15	694	LinJ.36.7240	2.20957e+16
			695	LbrM.09.1020	1.09174e+16	695	LbrM.34.3440	1.86042e+16				695	LinJ.36.2890	1.45194e+16	695	LinJ.16.1430	2.20602e+16
			696	LbrM.27.1230	1.08819e+16	696	LbrM.32.2960	1.85881e+16				696	LinJ.21.2200	1.45038e+16	696	LinJ.25.0130	2.20428e+15
			697	LbrM.31.3570	1.08568e+16	697	LbrM.33.3460	1.8576e+16				697	LinJ.36.1840	1.45004e+16	697	LinJ.21.1670	2.20274e+15
			698	LbrM.07.0750	1.08249e+16	698	LbrM.35.3640	1.85363e+16				698	LinJ.36.4750	1.44478e+16	698	LinJ.36.2480	2.18899e+16
			699	LbrM.35.5950	1.08e+16	699	LbrM.07.1080	1.84584e+16				699	LinJ.29.2560	1.44027e+16	699	LinJ.28.0240	2.16218e+16
			700	LbrM.24.1360	1.07615e+16	700	LbrM.30.3550	1.83733e+16				700	LinJ.31.3250	1.43987e+16	700	LinJ.25.2090	2.15393e+16
			701	LbrM.29.1320	1.07247e+16	701	LbrM.34.4340	1.83528e+16				701	LinJ.18.1140	1.439e+16	701	LinJ.28.1470	2.13403e+16
			702	LbrM.13.1420	1.07204e+16	702	LbrM.26.2160	1.83124e+15				702	LinJ.21.2050	1.43383e+16	702	LinJ.30.1310	2.12176e+15
			703	LbrM.23.1260	1.06989e+16	703	LbrM.30.3070	1.81596e+15				703	LinJ.36.1670	1.43373e+16	703	LinJ.32.0400	2.09517e+16
			704	LbrM.09.0250	1.06068e+16	704	LbrM.18.0720	1.81039e+16				704	LinJ.35.2080	1.40703e+15	704	LinJ.07.0610	2.09276e+15
			705	LbrM.27.2510	1.05585e+16	705	LbrM.24.2370	1.80526e+16				705	LinJ.34.2030	1.39883e+16	705	LinJ.04.1140	2.09205e+15
			706	LbrM.12.0680	1.05447e+16	706	LbrM.28.0250	1.80435e+16				706	LinJ.36.3990	1.3948e+15	706	LinJ.10.0090	2.08162e+16
			707	LbrM.12.0630	1.02598e+16	707	LbrM.28.1900	1.77673e+16				707	LinJ.36.1490	1.38583e+16	707	LinJ.13.1360	2.07839e+16
			708	LbrM.20.4010	1.02378e+16	708	LbrM.35.0120	1.77098e+16				708	LinJ.29.0770	1.37703e+16	708	LinJ.34.0010	2.06478e+16
			709	LbrM.13.0320	1022162134244	709	LbrM.34.4850	1.76994e+15				709	LinJ.32.0940	1.3583e+15	709	LinJ.13.1400	2.05173e+16
			710	LbrM.20.5640	1.01934e+16	710	LbrM.04.1140	1.76264e+16				710	LinJ.35.5280	1.35058e+16	710	LinJ.29.2490	2.04449e+16
			711	LbrM.28.1460	1.00996e+16	711	LbrM.20.0830	1.75861e+16				711	LinJ.23.0710	1.34929e+16	711	LinJ.21.2200	2.00028e+16
			711	LbrM.24.0130	1.00996e+16	712	LbrM.21.0550	1.75779e+16				712	LinJ.22.0960	1.34703e+15	712	LinJ.32.1010	1.99653e+16
			713	LbrM.33.2980	1.00615e+16	713	LbrM.15.0040	1.75481e+16				713	LinJ.28.2960	133322136804204	713	LinJ.29.0950	1.97885e+16
			714	LbrM.30.3630	1.00005e+16	714	LbrM.20.2970	1.75107e+15				714	LinJ.18.1460	1.33147e+16	714	LinJ.26.0150	1.97623e+16
			715	LbrM.23.1760	9.98112e+15	715	LbrM.23.0700	1.74266e+16				715	LinJ.30.3720	1.33104e+16	715	LinJ.35.4320	1.9736e+16
			716	LbrM.08.0030	9.94491e+15	716	LbrM.34.1120	1.73285e+16				716	LinJ.28.1190	1.32015e+16	716	LinJ.36.1060	1.96828e+16
			717	LbrM.30.3580	9.93209e+15	717	LbrM.29.0730	1.73227e+15				717	LinJ.15.1070	1.30507e+16	717	LinJ.29.2680	1.95969e+16
			718	LbrM.17.1500	9.92597e+15	718	LbrM.34.0580	1.72295e+16				718	LinJ.34.3990	1.30371e+16	718	LinJ.29.0750	1.95234e+16
			719	LbrM.24.2240	9.83846e+15	719	LbrM.19.1110	1.70209e+16				719	LinJ.36.0250	1.29584e+15	719	LinJ.36.4380	1.94204e+16
			720	LbrM.20.2460	9.80456e+15	720	LbrM.14.0140	1.69216e+16				719	LinJ.22.1280	1.29584e+15	720	LinJ.19.0420	1.93279e+16
			721	LbrM.22.0510	9.78205e+15	721	LbrM.35.6900	1.68901e+15				719	LinJ.07.1180	1.29584e+15	721	LinJ.17.1530	1.93148e+16
			722	LbrM.22.0370	9.73997e+15	722	LbrM.10.0110	1.68785e+16				722	LinJ.21.0310	1.28926e+16	722	LinJ.27.1730	1.92512e+15
			723	LbrM.19.0190	9.71871e+15	723	LbrM.26.0170	1.68216e+16				723	LinJ.26.1230	1.28361e+16	723	LinJ.19.0800	1.91602e+16
			724	LbrM.20.3890	9.68658e+15	724	LbrM.23.0570	1.67922e+16				724	LinJ.30.1840	1.27983e+16	724	LinJ.25.0630	1.91478e+16
			725	LbrM.04.0610	9.68538e+15	725	LbrM.14.1360	1.67711e+16				724	LinJ.24.2090	1.27983e+16	725	LinJ.36.3630	1.91447e+16
			726	LbrM.25.2020	9.65409e+15	726	LbrM.07.1110	167075728144021				724	LinJ.20.1140	1.27983e+16	726	LinJ.28.2550	1.91315e+16
			727	LbrM.08.0330	963069558636513	727	LbrM.24.2280	1.66389e+16				727	LinJ.03.0180	1.26805e+16	727	LinJ.31.2320	1.90014e+16
			728	LbrM.17.1540	962651856360664	728	LbrM.05.0200	1.66198e+15				728	LinJ.11.1000	1.26784e+16	728	LinJ.23.1170	1.88875e+16
			729	LbrM.31.0020	958124374711526	729	LbrM.01.0080	1.64682e+16				729	LinJ.35.3730	1.26123e+16	729	LinJ.15.0220	1.88445e+16
			730	LbrM.04.0010	949573630043239	730	LbrM.12.0820	1.64577e+16				730	LinJ.11.0130	1.25865e+16	730	LinJ.21.1330	1.87639e+16
			731	LbrM.26.1730	9.35395e+15	731	LbrM.35.0980	1.63733e+16				731	LinJ.18.0630	1.25719e+15	731	LinJ.09.0720	1.86481e+16
			732	LbrM.30.3690	9.33418e+15	732	LbrM.10.1010	1.61649e+15				732	LinJ.36.2140	1.24932e+15	732	LinJ.23.1680	1.85931e+16
			733	LbrM.15.0040	9.31586e+15	733	LbrM.30.1370	1.59061e+16				733	LinJ.35.3880	1.24323e+16	733	LinJ.10.0430	1.85906e+16
			734	LbrM.32.0120	9.1741e+15	734	LbrM.20.1830	1.57604e+15				734	LinJ.31.3260	1.24135e+16	734	LinJ.32.2160	1.84818e+16
			735	LbrM.27.1520	9.04784e+15	735	LbrM.28.2010	1.57431e+16				735	LinJ.23.1910	1.24117e+15	735	LinJ.33.0480	1.84798e+16
			736	LbrM.20.3600	9.02274e+15	736	LbrM.32.0460	1.57041e+16				736	LinJ.24.0930	1.24076e+16	736	LinJ.31.1770	1.84503e+16
			737	LbrM.26.0200	8.93103e+15	737	LbrM.05.0410	1.56581e+16				737	LinJ.35.3400	1.23874e+16	737	LinJ.29.0670	1.84422e+16
			738	LbrM.12.0820	8.92653e+15	738	LbrM.23.1530	1.56465e+16				738	LinJ.31.2980	1.23795e+16	738	LinJ.08.1290	1.84223e+16
			739	LbrM.29.0230	8.92317e+15	739	LbrM.30.3340	1.55577e+16				739	LinJ.18.1220	1.23726e+16	739	LinJ.16.0310	1.84058e+16
			740	LbrM.08.0060	8.91808e+15	740	LbrM.20.4000	1.55257e+15				740	LinJ.28.1430	1.23641e+15	740	LinJ.27.0190	1.84014e+16
			741	LbrM.23.1750	8.91583e+15	741	LbrM.35.2030	1.55087e+16				741	LinJ.35.4010	1.22223e+15	741	LinJ.30.0640	183710065156241
			742	LbrM.28.0710	8.87e+15	742	LbrM.03.0110	1.53872e+16				742	LinJ.28.2220	1.21186e+16	742	LinJ.03.0190	1.83141e+16
			743	LbrM.25.0610	8.74383e+15	743	LbrM.35.4040	1.53752e+16				743	LinJ.24.2170	1.19458e+16	743	LinJ.36.6510	1.82481e+16
			744	LbrM.34.3660	8.68422e+15	744	LbrM.20.5640	1.53594e+16				744	LinJ.31.0030	1.19277e+15	744	LinJ.19.0390	1.79213e+16
			745	LbrM.33.0570	8.60752e+15	745	LbrM.26.2600	1.51605e+16				745	LinJ.07.0760	1.17991e+16	745	LinJ.01.0050	1.79193e+16
			746	LbrM.32.3590	8.5429e+15	746	LbrM.31.3240	1.51066e+16				746	LinJ.36.5920	1.17922e+16	746	LinJ.28.1850	1.79122e+16
			747	LbrM.01.0030	8.54097e+15	747	LbrM.28.0120	1.50469e+15				747	LinJ.15.0040	1.17391e+16	747	LinJ.32.0410	1.76988e+16
			748	LbrM.14.0310	8.53465e+15	748	LbrM.18.1230	1.48174e+16				748	LinJ.27.1370	1.17195e+16	748	LinJ.36.1000	1.76461e+16
			749	LbrM.35.2470	8.47197e+15	749	LbrM.30.2950	1.47184e+16				749	LinJ.36.5650	1.171e+16	749	LinJ.28.0420	1.75847e+16
			750	LbrM.24.2160	8.42427e+15	750	LbrM.35.2270	1.46944e+16				750	LinJ.22.0190	1.16832e+15	750	LinJ.35.1210	1.74943e+16
			751	LbrM.35.1480	8.37398e+15	751	LbrM.33.1360	1.45295e+16				751	LinJ.23.0570	1.16386e+15	751	LinJ.33.0860	1.74601e+16
			752	LbrM.35.0510	8.31795e+15	752	LbrM.33.0920	1.44963e+16				752	LinJ.12.0580	1.16245e+15	752	LinJ.30.1420	1.74299e+16
			753	LbrM.06.1160	8.29533e+15	752	LbrM.33.0930	1.44963e+16				753	LinJ.24.1550	1.15939e+16	753	LinJ.18.1570	1.74182e+15
			754	LbrM.20.1120	8.17753e+15	754	LbrM.35.3300	1.44931e+16				754	LinJ.12.0630	1.15671e+16	754	LinJ.36.3230	1.72588e+16
			755	LbrM.25.1410	8.1768e+15	755	LbrM.01.0300	1.44861e+15				755	LinJ.29.2870	1.13893e+16	755	LinJ.34.0130	1.71645e+16
			756	LbrM.35.6180	8.15635e+15	756	LbrM.20.0020	1.43719e+15				756	LinJ.36.4570	1.13825e+16	756	LinJ.32.0720	1.71465e+16
			757	LbrM.09.0800	8.15054e+15	757	LbrM.31.3560	1.42889e+16				757	LinJ.05.0320	1.13004e+16	757	LinJ.18.0150	1.71416e+16
			758	LbrM.33.0720	8.14166e+15	758	LbrM.20.1760	1.42212e+16				758	LinJ.18.1090	1.11896e+16	758	LinJ.29.0160	1.71346e+16
			759	LbrM.33.0460	8.12878e+15	759	LbrM.20.3140	1.40047e+16				759	LinJ.36.6580	1.11882e+16	759	LinJ.21.0550	1.69865e+16
			760	LbrM.31.2410	810802375529222	760	LbrM.35.6570	1.39511e+16				760	LinJ.35.3910	1.10808e+16	760	LinJ.32.3130	1.68922e+16
			761	LbrM.21.1570	7.96366e+15	761	LbrM.26.0840	1.38618e+16				761	LinJ.09.0400	1.10661e+16	761	LinJ.12.0580	1.67593e+16
			762	LbrM.15.0410	7.94178e+15	762	LbrM.35.5420	1.378e+16				762	LinJ.27.2250	1.10006e+15	762	LinJ.27.1170	1.66382e+15
			763	LbrM.20.1030	7.90815e+15	763	LbrM.25.0610	1.37491e+15				763	LinJ.36.1220	1.09534e+16	763	LinJ.28.2660	1.63782e+16
			764	LbrM.03.0450	7.84862e+15	764	LbrM.06.1270	1.36889e+16				764	LinJ.08.0060	1.09373e+15	764	LinJ.14.1270	1.6207e+16
			765	LbrM.28.2340	771380020746989	765	LbrM.32.4160	1.33979e+16				765	LinJ.36.3970	1.09266e+16	765	LinJ.05.0400	1.60627e+16
			766	LbrM.31.3320	7.66537e+15	766	LbrM.21.1920	1.33715e+15				765	LinJ.20.0650	1.09266e+16	766	LinJ.32.1910	1.59003e+16
			767	LbrM.27.0200	76251775496361	767	LbrM.33.2840	1.32638e+15				765	LinJ.20.0140	1.09266e+16	767	LinJ.03.0090	1.5881e+15
			768	LbrM.11.0350	7.61192e+15	768	LbrM.30.1610	1.31993e+16				765	LinJ.03.0950	1.09266e+16	768	LinJ.35.3560	1.58725e+16
			769	LbrM.27.2430	7.41839e+15	769	LbrM.07.0750	1.29803e+16				769	LinJ.27.1010	1.09262e+15	769	LinJ.34.0070	1.58474e+15
			770	LbrM.25.2220	7.40399e+15	770	LbrM.05.0970	1.29742e+15				770	LinJ.15.1100	1.09195e+15	770	LinJ.17.0080	1.56951e+16
			771	LbrM.34.2890	7.36754e+15	771	LbrM.34.3820	1.29598e+16				771	LinJ.22.0490	1.08508e+15	771	LinJ.22.1230	1.56461e+16
			772	LbrM.04.0960	7.3518e+15	772	LbrM.22.1260	1.28606e+16				772	LinJ.36.4000	1.08423e+15	772	LinJ.33.0320	1.56311e+16
			773	LbrM.23.0840	7.32775e+15	773	LbrM.28.1630	1.28281e+16				773	LinJ.24.2250	1.0809e+16	773	LinJ.06.0430	1.56311e+16
			774	LbrM.34.0440	7.27936e+15	774	LbrM.28.1420	1.28278e+16				774	LinJ.33.0730	1.07839e+16	774	LinJ.30.3350	1.55298e+16
			775	LbrM.03.0170	7.2747e+15	775	LbrM.35.4770	1.27947e+16				775	LinJ.30.3660	1.07819e+16	775	LinJ.35.0050	1.54929e+16
			776	LbrM.16.0070	7.19033e+15	776	LbrM.34.1990	1.27836e+15				776	LinJ.18.0450	1.06096e+16	776	LinJ.30.3440	1.53734e+15
			777	LbrM.20.0970	7.17802e+15	777	LbrM.33.0890	1.27224e+15				777	LinJ.13.0390	1.04912e+16	777	LinJ.14.0140	1.53517e+16
			778	LbrM.16.0550	7.15044e+15	778	LbrM.34.0090	1.26976e+15				778	LinJ.15.1140	1.0443e+16	778	LinJ.24.1610	1.52979e+16
			779	LbrM.08.0240	7.10054e+15	779	LbrM.32.0980	1.26541e+16				778	LinJ.15.1120	1.0443e+16	779	LinJ.24.0370	1.52703e+16
			780	LbrM.03.0210	7.0255e+15	780	LbrM.35.5670	1.24647e+16				780	LinJ.26.0030	1.0422e+16	780	LinJ.10.1250	1.5211e+16
			781	LbrM.23.1470	6.97177e+15	781	LbrM.24.1320	1.24189e+16				781	LinJ.35.4910	1.03914e+16	781	LinJ.07.0250	1.52009e+16
			782	LbrM.18.0700	6.9545e+15	782	LbrM.09.0250	1.23633e+16				782	LinJ.33.2840	1.03883e+15	782	LinJ.01.0110	1.51755e+16
			783	LbrM.35.0550	692530168821716	783	LbrM.26.1590	1.23616e+16				783	LinJ.25.2540	1.03734e+16	783	LinJ.31.3250	1.51447e+16
			784	LbrM.29.0910	6.91138e+15	784	LbrM.02.0410	1.23442e+16				784	LinJ.08.0030	1.03388e+15	784	LinJ.05.0200	1.50776e+16
			785	LbrM.28.2670	6.91055e+15	785	LbrM.30.2500	1.23412e+16				785	LinJ.30.3610	1.02824e+16	785	LinJ.27.1350	1.50583e+16
			786	LbrM.17.0800	6.90504e+15	786	LbrM.26.0190	1.22477e+16				786	LinJ.17.1480	1.02743e+16	786	LinJ.34.1060	1.49576e+15
			787	LbrM.04.0730	6.89931e+15	787	LbrM.26.1270	1.22237e+15				787	LinJ.36.1410	1.02152e+16	787	LinJ.30.3000	1.48982e+16
			788	LbrM.24.0790	6.80405e+15	788	LbrM.35.5950	1.22228e+16				788	LinJ.26.0190	1.01927e+15	788	LinJ.26.0790	1.4869e+15
			789	LbrM.03.0200	6.764e+15	789	LbrM.16.1590	1.21847e+15				789	LinJ.36.0990	1.01551e+16	789	LinJ.13.1180	1.47604e+16
			790	LbrM.31.0310	6.72459e+15	790	LbrM.34.3850	1.20915e+15				790	LinJ.28.1390	1.0149e+16	790	LinJ.19.0170	1.47328e+16
			791	LbrM.33.0300	6.6728e+15	791	LbrM.18.0520	1.20848e+16				791	LinJ.22.0440	1.00981e+15	791	LinJ.25.1360	1.47085e+15
			792	LbrM.29.1020	6.66956e+15	792	LbrM.22.0300	1.20847e+16				792	LinJ.36.0540	1.00014e+16	792	LinJ.36.2890	1.4673e+15
			793	LbrM.27.0670	6.61696e+15	793	LbrM.25.0940	1.20638e+16				793	LinJ.22.0270	9.94413e+15	793	LinJ.30.3580	1.45078e+16
			794	LbrM.15.1560	6.53183e+15	794	LbrM.27.2560	1.20204e+16				794	LinJ.34.3800	9.9103e+15	794	LinJ.34.2030	1.45042e+16
			795	LbrM.32.3330	6.49367e+15	795	LbrM.31.1980	1.20012e+16				795	LinJ.29.2780	9.85103e+15	795	LinJ.36.1930	1.43536e+15
			796	LbrM.34.1640	6.41858e+15	796	LbrM.34.5250	1.18864e+15				796	LinJ.30.3390	9.71714e+15	796	LinJ.01.0440	1.43236e+16
			797	LbrM.21.0950	6.40414e+15	797	LbrM.15.1050	1.18725e+15				797	LinJ.07.1030	9.6781e+15	797	LinJ.05.0320	1.42953e+16
			798	LbrM.13.0050	6.35528e+15	798	LbrM.33.1610	1.17982e+16				798	LinJ.30.0120	9.55672e+15	798	LinJ.18.1500	1.42791e+16
			799	LbrM.33.0290	6.3161e+15	799	LbrM.32.2030	1.16636e+16				799	LinJ.07.0180	9.55653e+15	799	LinJ.20.1140	1.4085e+16
			800	LbrM.33.2630	6.27279e+15	800	LbrM.35.3320	1.16395e+16				800	LinJ.34.2700	9.52959e+15	799	LinJ.24.2090	1.4085e+16
			801	LbrM.35.5640	6.26997e+15	801	LbrM.33.2980	1.16072e+15				801	LinJ.20.1450	9.50081e+15	799	LinJ.30.1840	1.4085e+16
			802	LbrM.35.5420	6.19064e+15	802	LbrM.35.1570	1.15803e+16				802	LinJ.17.1110	9.39555e+15	802	LinJ.25.1090	1.40559e+16
			803	LbrM.21.1450	6.1589e+15	803	LbrM.19.1020	1.15196e+15				803	LinJ.36.2130	9.35761e+15	803	LinJ.36.1220	1.40252e+15
			804	LbrM.29.0770	6.11391e+15	804	LbrM.20.0150	1.14898e+16				804	LinJ.16.0830	9.35246e+15	804	LinJ.35.4830	1.39336e+16
			805	LbrM.07.0570	6.09537e+15	805	LbrM.24.1360	1.14491e+16				805	LinJ.24.0470	9.34219e+15	805	LinJ.17.1110	1.39178e+16
			806	LbrM.15.1010	6.05086e+15	806	LbrM.29.0760	1.1435e+16				806	LinJ.17.1520	9.3295e+15	806	LinJ.29.2870	1.38448e+16
			807	LbrM.29.1750	5.99226e+15	807	LbrM.07.0100	1.14283e+16				807	LinJ.36.1930	9.31576e+15	807	LinJ.28.1960	1.3842e+15
			808	LbrM.04.1140	5.96917e+15	808	LbrM.18.1310	1.1428e+16				808	LinJ.25.1850	9.29567e+15	808	LinJ.35.2080	1.38384e+16
			809	LbrM.21.1810	5.96446e+15	809	LbrM.09.0100	1.13112e+16				809	LinJ.13.0450	9.24271e+15	809	LinJ.36.4750	1.38366e+16
			810	LbrM.24.1780	5.93618e+15	809	LbrM.25.0470	1.13112e+16				810	LinJ.29.0230	9.06918e+15	810	LinJ.29.0770	1.37925e+15
			811	LbrM.28.0120	5.91636e+15	811	LbrM.11.0800	1.13025e+16				811	LinJ.01.0630	9.03046e+15	811	LinJ.27.2300	1.37269e+16
			812	LbrM.33.2110	5.90106e+15	812	LbrM.31.3570	1.11422e+16				812	LinJ.32.3500	900467828101629	812	LinJ.34.0160	1.3636e+16
			813	LbrM.14.0810	5.85204e+15	813	LbrM.24.1350	1.11349e+15				813	LinJ.36.2360	8.98828e+15	813	LinJ.04.0460	1.36244e+16
			814	LbrM.11.0230	5.79466e+15	814	LbrM.33.0660	1.10697e+16				814	LinJ.21.0300	8.95203e+15	814	LinJ.26.0380	1.35629e+16
			815	LbrM.25.0940	5.77075e+15	815	LbrM.28.1460	1.098e+16				815	LinJ.08.0240	8.95196e+15	815	LinJ.18.1460	1.35514e+16
			816	LbrM.27.2160	575482388930198	815	LbrM.24.0130	1.098e+16				816	LinJ.35.0400	893847150986497	816	LinJ.23.1910	1.3527e+16
			817	LbrM.13.0380	5.71828e+15	817	LbrM.09.1020	1.09047e+16				817	LinJ.07.0930	8.91409e+15	817	LinJ.02.0350	1.35129e+16
			818	LbrM.35.1830	5.64843e+15	818	LbrM.33.0940	1.08486e+16				818	LinJ.22.1210	8.90888e+15	818	LinJ.23.1400	1.33446e+16
			819	LbrM.13.1240	5.60023e+15	819	LbrM.34.0150	1.07544e+15				819	LinJ.36.1790	8.90092e+15	819	LinJ.27.1790	1.32158e+16
			820	LbrM.06.0330	5.57598e+15	820	LbrM.30.3580	1.07508e+15				820	LinJ.27.1300	8.84708e+15	820	LinJ.20.0080	1.31834e+16
			821	LbrM.22.1490	5.57281e+15	821	LbrM.23.1760	1.07492e+16				821	LinJ.17.0880	8.8214e+15	821	LinJ.22.0120	1.31463e+15
			822	LbrM.12.0020	5.48372e+15	822	LbrM.03.0450	1.07304e+15				822	LinJ.23.1610	8.81976e+15	822	LinJ.13.1620	1.31144e+16
			823	LbrM.31.3090	5.48222e+15	823	LbrM.27.1600	1.06483e+16				823	LinJ.31.2210	8.785e+15	823	LinJ.36.3990	1.31126e+16
			824	LbrM.06.0620	5.47335e+15	824	LbrM.10.0420	1.06292e+16				824	LinJ.34.1170	8.68344e+15	824	LinJ.35.5280	1.30294e+16
			825	LbrM.19.0570	5.46758e+15	825	LbrM.22.1040	1.05953e+16				825	LinJ.04.0550	8.66214e+15	825	LinJ.26.0180	129888434637352
			825	LbrM.13.1470	5.46758e+15	826	LbrM.17.1120	1.05702e+16				826	LinJ.36.5400	8.65167e+15	826	LinJ.09.0400	1.29742e+16
			825	LbrM.01.0060	5.46758e+15	827	LbrM.34.3260	1.03248e+16				827	LinJ.28.0730	8.62177e+15	827	LinJ.26.0470	1.29684e+16
			828	LbrM.24.0770	5.4331e+15	828	LbrM.20.1920	1.02909e+16				828	LinJ.29.0920	8.51104e+15	828	LinJ.29.2560	1.27215e+16
			829	LbrM.29.2440	5.41141e+15	829	LbrM.32.3140	1.02595e+15				829	LinJ.15.0440	8.46474e+15	829	LinJ.21.0730	1.26973e+16
			830	LbrM.35.2410	537663919111778	830	LbrM.22.0260	1.01916e+16				830	LinJ.36.0450	8.45406e+15	830	LinJ.36.5920	1.25361e+16
			831	LbrM.27.2030	5.36549e+15	831	LbrM.28.2670	1.00997e+15				831	LinJ.32.0600	84302844726684	831	LinJ.21.1990	1.24848e+16
			832	LbrM.28.2710	5.35797e+15	832	LbrM.35.2370	1.00646e+16				832	LinJ.06.1220	8.40854e+15	832	LinJ.35.3910	1.24366e+16
			833	LbrM.05.0970	5.34603e+15	833	LbrM.35.7030	1.00087e+16				833	LinJ.14.0900	8.39033e+15	833	LinJ.22.0190	1.23851e+16
			834	LbrM.20.3970	5.3285e+15	834	LbrM.30.0960	9.99841e+15				834	LinJ.09.1020	830869348101863	834	LinJ.13.0090	1.23756e+16
			835	LbrM.32.1050	5.30965e+15	835	LbrM.21.0870	9.99398e+15				835	LinJ.07.0560	8.26506e+15	835	LinJ.24.2400	1.23426e+16
			836	LbrM.35.6620	530255988092729	836	LbrM.30.2320	993799110643247				836	LinJ.23.0860	8.22488e+15	836	LinJ.07.1180	1.22854e+15
			837	LbrM.25.1960	5.29893e+15	837	LbrM.25.2020	992176367338151				837	LinJ.25.0760	8.16498e+15	837	LinJ.24.2170	1.22664e+16
			838	LbrM.28.3030	5.2951e+15	838	LbrM.33.0460	9.91645e+15				838	LinJ.34.4090	816247853405843	838	LinJ.22.0630	1.21126e+16
			839	LbrM.29.1660	5.27336e+15	839	LbrM.17.1500	989656816325375				839	LinJ.32.2070	8.14923e+15	839	LinJ.32.0940	1.20877e+16
			840	LbrM.35.6570	5.26703e+15	840	LbrM.27.1580	9.89579e+15				840	LinJ.04.0940	8.09873e+15	840	LinJ.35.3400	1.20749e+16
			840	LbrM.21.0870	5.26703e+15	841	LbrM.30.3690	9.86198e+15				841	LinJ.36.6140	8.08975e+15	841	LinJ.07.0180	1.20559e+16
			842	LbrM.01.0360	5.23526e+15	842	LbrM.13.1470	983327532086694				842	LinJ.04.0960	8.08385e+15	842	LinJ.30.3720	1.20202e+15
			843	LbrM.25.0620	5.22791e+15	843	LbrM.32.3590	9.81927e+15				843	LinJ.31.3060	8.07135e+15	843	LinJ.28.1120	1.19699e+15
			844	LbrM.29.0080	5.16669e+15	844	LbrM.22.0370	9.79041e+15				844	LinJ.33.0320	7.99651e+15	844	LinJ.33.2840	1.18563e+16
			845	LbrM.18.1550	5.16573e+15	845	LbrM.31.2410	9.71453e+15				845	LinJ.27.2170	797492331181696	845	LinJ.36.0250	1.1774e+16
			846	LbrM.17.1470	5.13489e+15	846	LbrM.24.2160	9.7087e+15				846	LinJ.07.0170	7.9739e+15	846	LinJ.30.0880	1.17448e+16
			847	LbrM.31.3530	5.13472e+15	847	LbrM.34.3010	9.68898e+15				847	LinJ.07.0550	7.96943e+15	847	LinJ.30.1570	1.17172e+16
			848	LbrM.34.3200	5.13376e+15	848	LbrM.29.0230	9.65751e+15				848	LinJ.25.1930	7.92738e+15	848	LinJ.03.0950	1.17083e+16
			849	LbrM.18.0690	5.11501e+16	849	LbrM.18.0690	9.6549e+15				849	LinJ.21.1290	7.79462e+15	848	LinJ.20.0140	1.17083e+16
			850	LbrM.17.1120	5.00159e+15	850	LbrM.20.2940	9.65273e+15				850	LinJ.03.0150	777112254541681	848	LinJ.20.0650	1.17083e+16
			851	LbrM.35.1900	4.99343e+16	851	LbrM.08.0360	9.60076e+15				851	LinJ.33.0580	7.68246e+15	848	LinJ.36.3970	1.17083e+16
			852	LbrM.32.0650	4.97084e+15	852	LbrM.25.0260	9.58267e+15				852	LinJ.06.0630	7.64854e+15	852	LinJ.34.3130	1.17041e+16
			853	LbrM.34.1050	4.96752e+15	853	LbrM.34.3070	9.56069e+15				853	LinJ.26.1800	7.63434e+15	853	LinJ.29.1230	1.1698e+15
			854	LbrM.24.1040	4.96465e+16	854	LbrM.01.0060	9.46461e+15				854	LinJ.06.0350	7.61633e+15	854	LinJ.27.1010	1.1652e+16
			855	LbrM.16.0260	4.95915e+15	855	LbrM.01.0030	9.41618e+15				855	LinJ.32.0070	7.57269e+15	855	LinJ.07.0760	1.16178e+16
			856	LbrM.27.0540	4.88918e+16	856	LbrM.34.0440	9.3845e+15				856	LinJ.34.1070	7.53317e+15	856	LinJ.35.3880	1.16069e+16
			857	LbrM.02.0070	4.88752e+16	857	LbrM.31.0020	9.24966e+15				857	LinJ.35.1190	7.52418e+15	857	LinJ.24.1440	1.15847e+16
			858	LbrM.20.3180	48542733093193	858	LbrM.32.3240	9.21804e+15				858	LinJ.09.0770	7.52077e+15	858	LinJ.23.0860	1.15529e+15
			859	LbrM.35.2040	4.85338e+16	859	LbrM.17.1540	9.18994e+15				859	LinJ.29.2580	7.47042e+15	859	LinJ.31.0030	1.155e+16
			860	LbrM.16.0250	4.8459e+16	860	LbrM.13.0320	9.16903e+15				860	LinJ.24.0790	7.46085e+15	860	LinJ.23.0710	1.15072e+15
			861	LbrM.13.0890	4.83031e+16	861	LbrM.18.0510	9.1089e+15				861	LinJ.32.1010	7.44221e+15	861	LinJ.28.1430	1.14737e+16
			862	LbrM.12.0300	4.77728e+16	862	LbrM.18.1520	9.0989e+15				862	LinJ.35.3030	7.41628e+15	862	LinJ.26.1230	1.14732e+16
			863	LbrM.32.1670	4.77719e+16	863	LbrM.35.6180	9.09021e+15				863	LinJ.36.0190	7.36369e+15	863	LinJ.16.0930	1.14604e+16
			864	LbrM.05.0030	4.69546e+15	864	LbrM.23.1260	9.0666e+15				864	LinJ.21.1490	7.33195e+15	864	LinJ.32.4020	1.13512e+16
			865	LbrM.34.2640	4.67448e+15	865	LbrM.27.1520	9.04171e+15				865	LinJ.31.0210	7.32857e+15	865	LinJ.31.3260	1.13399e+16
			866	LbrM.13.1480	4.59611e+16	866	LbrM.12.0040	9.03592e+15				866	LinJ.03.0520	7.32791e+15	866	LinJ.10.0900	1.13311e+16
			867	LbrM.20.1290	456056474553475	867	LbrM.32.3910	902598382925418				867	LinJ.16.0260	7.3197e+15	867	LinJ.25.0760	1.13251e+16
			868	LbrM.35.3760	4.5145e+16	868	LbrM.20.1120	8.98319e+15				868	LinJ.28.2290	7.29505e+15	868	LinJ.24.0930	1.11774e+16
			868	LbrM.31.2290	4.5145e+16	869	LbrM.20.2460	8.97396e+15				869	LinJ.22.0630	7.27473e+15	869	LinJ.30.0120	1.1128e+16
			868	LbrM.08.0500	4.5145e+16	870	LbrM.35.0940	8.96602e+15				870	LinJ.33.1470	7.21078e+15	870	LinJ.18.0460	1.11124e+16
			871	LbrM.20.3990	4.49781e+15	871	LbrM.23.1750	8.89177e+15				871	LinJ.34.0380	7.14646e+15	871	LinJ.28.1190	1.10879e+16
			872	LbrM.34.1760	4.48794e+15	872	LbrM.32.3920	8.71215e+15				872	LinJ.21.1670	7.13251e+15	872	LinJ.18.1220	1.10795e+16
			873	LbrM.30.0940	4.42669e+15	873	LbrM.33.0570	8.69683e+15				873	LinJ.18.0330	7.11975e+15	873	LinJ.12.0003	1.10632e+16
			874	LbrM.32.2170	439634026416206	874	LbrM.30.3630	8.6581e+15				874	LinJ.31.2070	7.06289e+15	874	LinJ.32.1940	1.10518e+16
			875	LbrM.28.1190	4.29483e+16	875	LbrM.35.2860	8.56013e+15				874	LinJ.08.0480	7.06289e+15	875	LinJ.24.1550	1.1034e+16
			876	LbrM.28.0550	4.29243e+16	876	LbrM.14.1600	8.4986e+15				876	LinJ.34.4180	7.0536e+15	876	LinJ.17.0700	1.09895e+16
			877	LbrM.34.4410	4.2667e+16	877	LbrM.16.1460	8.48561e+15				877	LinJ.30.3310	7.02582e+15	877	LinJ.24.0780	1.09329e+15
			878	LbrM.20.5800	4.23612e+16	878	LbrM.12.0630	8.48442e+15				878	LinJ.14.0310	7.02532e+15	878	LinJ.36.6580	1.08879e+16
			879	LbrM.18.1700	4.22821e+16	879	LbrM.20.1890	8.2541e+15				879	LinJ.36.5620	7.02482e+15	879	LinJ.13.0330	1.0791e+15
			880	LbrM.35.2560	4.19751e+15	880	LbrM.34.2890	8.24824e+15				880	LinJ.29.2970	7.01592e+15	880	LinJ.36.1790	1.07301e+15
			881	LbrM.13.0970	418220589112013	881	LbrM.32.3210	8.12971e+15				881	LinJ.34.4270	7.00581e+15	881	LinJ.36.5650	1.07278e+16
			882	LbrM.26.0400	4.17479e+16	882	LbrM.23.0840	8.10187e+15				882	LinJ.24.1790	6.91775e+15	882	LinJ.31.2210	1.07156e+16
			883	LbrM.20.4090	4.16026e+15	883	LbrM.20.1030	8.07613e+15				883	LinJ.34.1800	689255891187135	883	LinJ.22.0270	1.06488e+16
			884	LbrM.31.0870	4.14342e+16	884	LbrM.04.0010	8.05574e+15				884	LinJ.36.0490	6.84484e+15	884	LinJ.36.1490	1.06353e+15
			885	LbrM.20.1170	4.10243e+16	885	LbrM.15.0410	8.03264e+15				885	LinJ.29.1330	6.75102e+15	885	LinJ.03.0180	1.0633e+16
			886	LbrM.20.0050	4.10071e+15	886	LbrM.35.0600	8.01576e+15				886	LinJ.03.0190	6.75088e+15	886	LinJ.30.3610	1.05897e+16
			887	LbrM.20.0010	4.05691e+16	887	LbrM.15.0920	8.00455e+15				887	LinJ.29.1030	6.73028e+15	887	LinJ.28.1420	1.05423e+16
			888	LbrM.34.4130	4.04472e+16	888	LbrM.16.0070	7.98797e+15				888	LinJ.17.0890	6.70272e+15	888	LinJ.27.1370	1.04999e+16
			889	LbrM.24.2320	4.03483e+15	889	LbrM.25.1410	7.9163e+15				889	LinJ.30.1310	66843752198152	889	LinJ.36.4000	1.04938e+16
			890	LbrM.07.0780	3.97481e+15	890	LbrM.17.0080	7.74103e+15				890	LinJ.13.0050	6.6153e+15	890	LinJ.16.1480	1.04844e+16
			891	LbrM.32.2130	3.96954e+15	891	LbrM.12.0680	768525911246732				891	LinJ.25.2040	6.54371e+15	891	LinJ.29.0230	1.04691e+15
			892	LbrM.34.1100	3.95142e+15	892	LbrM.06.1160	7.65333e+15				892	LinJ.23.0050	6.46287e+15	892	LinJ.34.1170	1.0436e+16
			893	LbrM.06.0410	3.87722e+15	893	LbrM.09.0800	7.65065e+15				893	LinJ.25.2480	6.41325e+15	893	LinJ.12.0630	1.04069e+16
			894	LbrM.28.0790	3.86753e+16	894	LbrM.27.2430	7.62775e+15				894	LinJ.28.2660	6.38399e+15	894	LinJ.35.4540	1.0356e+16
			895	LbrM.13.0150	3.86058e+16	895	LbrM.14.0310	7.61644e+15				895	LinJ.35.1840	6.38265e+15	895	LinJ.32.3500	103520149308097
			896	LbrM.32.2240	3.83735e+15	896	LbrM.15.0170	760227748520445				896	LinJ.32.2780	6.3239e+15	896	LinJ.14.1460	1.03208e+15
			896	LbrM.10.1010	3.83735e+15	897	LbrM.24.0780	7.57218e+15				897	LinJ.29.0780	6.2289e+15	897	LinJ.30.0900	1.02973e+16
			898	LbrM.34.1450	3.78823e+15	898	LbrM.07.0290	7.53252e+15				898	LinJ.21.0960	6.21693e+15	898	LinJ.07.1160	1.02731e+16
			899	LbrM.20.2970	3.77697e+15	899	LbrM.28.0510	7.49382e+15				899	LinJ.16.0250	6.18953e+15	899	LinJ.25.1850	1.02506e+16
			900	LbrM.34.2120	3.73238e+16	900	LbrM.25.2220	748609909216298				900	LinJ.25.0530	6.14635e+15	900	LinJ.28.2960	1.02502e+16
			901	LbrM.14.1560	3.70602e+15	901	LbrM.26.1730	7.46241e+15				900	LinJ.25.0510	6.14635e+15	901	LinJ.35.0110	1.02407e+16
			902	LbrM.32.2880	3.70052e+16	902	LbrM.04.0730	7.41236e+15				900	LinJ.09.0100	6.14635e+15	902	LinJ.23.0380	1.02233e+16
			903	LbrM.27.0960	3.5953e+16	903	LbrM.33.0720	7.38714e+15				903	LinJ.25.1360	6.12333e+15	903	LinJ.18.0650	1.02229e+16
			904	LbrM.34.3310	3.57171e+15	904	LbrM.31.0550	733569436968265				904	LinJ.23.0790	6.12326e+15	904	LinJ.26.0030	1.00984e+16
			905	LbrM.03.0810	3.56762e+16	905	LbrM.30.3100	7.32117e+15				905	LinJ.07.1160	609824390469904	905	LinJ.07.0060	1.00822e+15
			906	LbrM.30.1370	3.54373e+15	906	LbrM.33.2630	731898003754171				906	LinJ.33.1940	6.08153e+15	906	LinJ.20.1450	1.0009e+16
			907	LbrM.31.3240	3.53963e+16	907	LbrM.31.0310	7.29636e+15				907	LinJ.33.2470	6.07039e+15	907	LinJ.14.0180	989478081549452
			908	LbrM.19.0980	3.53789e+16	908	LbrM.21.1570	7.27106e+15				908	LinJ.15.1030	6.01547e+15	908	LinJ.17.1450	9.80865e+15
			909	LbrM.14.1080	3.52807e+16	909	LbrM.31.3320	7.21349e+15				909	LinJ.33.0310	601201369441537	909	LinJ.13.0390	9.79099e+15
			910	LbrM.20.1540	3.52677e+16	910	LbrM.29.1320	7.1695e+15				910	LinJ.12.0001	5.92673e+15	910	LinJ.25.2540	9.78721e+15
			911	LbrM.28.2010	3.45332e+16	911	LbrM.32.0120	7.15892e+15				911	LinJ.27.1900	5.8553e+15	911	LinJ.17.1480	9.75061e+15
			912	LbrM.30.3100	3.41835e+16	912	LbrM.08.0240	7.1356e+15				912	LinJ.35.2230	5.8196e+15	912	LinJ.14.0900	9.71531e+15
			913	LbrM.33.0940	3.38711e+15	913	LbrM.25.0840	705277091305112				913	LinJ.29.1780	5.76574e+15	913	LinJ.15.1070	970390485607184
			914	LbrM.34.4380	3.38474e+15	914	LbrM.29.1020	6.95161e+15				914	LinJ.35.1150	5.74865e+15	914	LinJ.29.0910	9.65915e+15
			915	LbrM.21.0170	3.32157e+15	915	LbrM.07.0570	6.94903e+15				915	LinJ.27.0190	5.72268e+15	915	LinJ.36.0990	95967146940459
			916	LbrM.25.0990	3.26243e+16	916	LbrM.13.1420	6.94612e+15				916	LinJ.07.0430	5.67435e+15	916	LinJ.06.0630	9.59166e+15
			917	LbrM.34.4730	3.24912e+15	917	LbrM.14.0130	6.89938e+15				917	LinJ.22.1430	5.66384e+15	917	LinJ.23.0340	9.57455e+15
			918	LbrM.20.0020	3.23988e+16	918	LbrM.29.0910	688522262036889				918	LinJ.36.6510	5.65066e+15	918	LinJ.22.0960	9.55302e+15
			919	LbrM.35.5720	3.21829e+16	919	LbrM.17.0800	6.87939e+15				918	LinJ.21.0870	5.65066e+15	919	LinJ.05.0130	9.54637e+15
			920	LbrM.29.2220	3.21641e+15	920	LbrM.10.0950	6.77653e+15				920	LinJ.31.2830	5.63949e+15	920	LinJ.15.1120	9.38445e+15
			921	LbrM.25.1530	3.18206e+16	921	LbrM.28.2340	6.77536e+15				921	LinJ.28.0110	5.62004e+15	921	LinJ.30.2380	937029759775716
			922	LbrM.35.5130	318003664067849	922	LbrM.08.0030	6.74648e+15				922	LinJ.36.2300	5.6183e+15	922	LinJ.30.3310	9.35649e+15
			923	LbrM.04.0950	3.11295e+15	923	LbrM.23.1470	6.7156e+15				923	LinJ.12.0100	5.60722e+15	923	LinJ.28.2280	9.35555e+15
			924	LbrM.32.2150	3.06095e+15	924	LbrM.20.0510	6.68666e+15				924	LinJ.30.0880	5.59071e+15	924	LinJ.08.0060	9.29498e+15
			925	LbrM.21.0600	3.05605e+16	925	LbrM.20.0970	6.52966e+15				925	LinJ.34.3380	555783664943136	925	LinJ.19.0250	9.21724e+15
			926	LbrM.10.0030	3.0397e+15	926	LbrM.27.0200	6.52166e+15				926	LinJ.34.1130	5.55359e+15	926	LinJ.26.1030	9.17379e+15
			927	LbrM.32.0500	3.03108e+15	927	LbrM.11.0350	6.51312e+15				927	LinJ.24.1050	5.54823e+15	927	LinJ.13.1350	912071978127163
			928	LbrM.28.1510	3.03071e+15	928	LbrM.13.0380	6.50894e+15				928	LinJ.15.1060	5.52457e+15	928	LinJ.33.0730	907762882809432
			929	LbrM.06.0940	3.02819e+15	929	LbrM.08.0350	650153855641484				929	LinJ.28.2700	5.49473e+15	929	LinJ.17.1520	9.0638e+15
			930	LbrM.18.0960	2.95179e+15	930	LbrM.29.2820	6.47691e+15				930	LinJ.34.3160	5.47323e+15	930	LinJ.32.2070	9.03522e+15
			931	LbrM.18.1640	2.92118e+16	931	LbrM.34.1150	6.47419e+15				931	LinJ.18.1660	5.47232e+15	931	LinJ.01.0630	8.91244e+15
			932	LbrM.07.0280	2.83695e+15	932	LbrM.21.1990	6.46867e+15				932	LinJ.25.1090	5.3122e+15	932	LinJ.13.0450	884387773086087
			933	LbrM.28.1950	2.83265e+15	933	LbrM.29.1750	6.45356e+15				933	LinJ.17.1450	5.29856e+15	933	LinJ.30.3390	8.83779e+15
			934	LbrM.28.2160	282532533410741	934	LbrM.05.0310	6.43498e+15				934	LinJ.24.2300	527341555239225	934	LinJ.27.0860	8.83074e+15
			935	LbrM.16.0840	2.8008e+16	935	LbrM.20.5500	6.43303e+15				935	LinJ.26.2700	5.22667e+15	935	LinJ.18.1140	8.80559e+15
			936	LbrM.29.1530	2.74532e+15	936	LbrM.35.1900	6.42623e+15				936	LinJ.34.1220	520427022636543	936	LinJ.27.1300	8.67099e+15
			937	LbrM.24.0780	2.72614e+15	937	LbrM.13.0050	6.35305e+15				937	LinJ.27.0460	5.17214e+15	937	LinJ.04.0940	8.62435e+15
			938	LbrM.24.0370	2.7155e+15	938	LbrM.27.2160	6.32093e+15				938	LinJ.01.0330	5.141e+15	938	LinJ.15.0440	8.60769e+15
			939	LbrM.20.0890	2.71055e+15	939	LbrM.27.0450	6.31639e+15				939	LinJ.29.0070	5.10785e+15	939	LinJ.30.3660	8.60457e+15
			940	LbrM.23.1650	2.70209e+16	940	LbrM.21.1810	6.27383e+15				940	LinJ.28.1420	5.09025e+16	940	LinJ.35.0400	8.54689e+15
			941	LbrM.26.0320	2.68462e+16	941	LbrM.14.0810	627022452235703				941	LinJ.19.1480	5.04824e+16	941	LinJ.24.0470	8.54109e+15
			942	LbrM.32.1160	2.67497e+16	942	LbrM.31.2520	6.24572e+15				942	LinJ.13.1530	5.04363e+15	942	LinJ.26.0190	8.47298e+15
			943	LbrM.09.0980	2.64475e+15	943	LbrM.33.2810	6.22778e+15				943	LinJ.16.0070	5.03425e+15	943	LinJ.34.3800	8.43835e+15
			944	LbrM.31.1280	2.64438e+15	944	LbrM.27.0670	6.21434e+15				944	LinJ.31.3220	4.98525e+15	944	LinJ.36.5960	8.43674e+15
			945	LbrM.17.0080	2.63072e+16	945	LbrM.30.0940	6.16937e+15				945	LinJ.35.3450	4.97304e+15	945	LinJ.18.0330	8.37021e+15
			945	LbrM.04.0530	2.63072e+16	946	LbrM.32.0780	616352813339089				946	LinJ.34.0130	4.97068e+15	946	LinJ.33.0360	836165226871263
			947	LbrM.02.0580	2.61207e+15	947	LbrM.22.1490	610361743517078				947	LinJ.31.2570	4.82046e+15	947	LinJ.11.0130	8.32893e+15
			948	LbrM.33.0830	2.60391e+15	948	LbrM.29.0510	6.08696e+15				948	LinJ.35.4490	4.81181e+16	948	LinJ.07.0560	831787538687158
			949	LbrM.26.0060	2.59719e+15	949	LbrM.15.1560	6.07548e+15				949	LinJ.31.1650	4.7436e+16	949	LinJ.36.2260	8.25456e+15
			950	LbrM.35.0120	2.59583e+15	950	LbrM.25.2310	6.0343e+15				950	LinJ.34.2620	4.71873e+16	950	LinJ.26.0780	8.19349e+15
			951	LbrM.28.1410	2.59113e+16	951	LbrM.20.3600	6.03078e+15				951	LinJ.03.0350	4.70441e+15	951	LinJ.34.2700	8.06086e+15
			952	LbrM.31.0140	2.582e+15	952	LbrM.17.0630	5.97404e+15				952	LinJ.03.0360	4.6971e+16	952	LinJ.07.0550	804274534687869
			953	LbrM.21.1210	2.54527e+16	953	LbrM.33.0300	596064372379031				953	LinJ.32.2090	4.67587e+15	953	LinJ.17.0880	8.00031e+15
			954	LbrM.32.0970	2.54183e+16	954	LbrM.03.0200	5.95669e+15				954	LinJ.20.1610	4.65142e+15	954	LinJ.36.0090	7.99921e+15
			955	LbrM.07.0360	2.4846e+16	955	LbrM.33.1800	5.85425e+15				955	LinJ.34.0170	4.58113e+16	955	LinJ.35.3030	7.94865e+15
			956	LbrM.20.0150	2.47181e+16	956	LbrM.21.0480	5.83906e+15				956	LinJ.05.0030	4.57166e+15	956	LinJ.33.0580	7.9003e+15
			957	LbrM.14.1300	2.41441e+16	957	LbrM.35.5640	5.83556e+15				957	LinJ.24.0370	4.56078e+16	957	LinJ.08.0240	7.79819e+15
			958	LbrM.32.0240	2.36913e+16	958	LbrM.11.0230	5.79088e+15				958	LinJ.28.3040	4.4981e+16	958	LinJ.16.0010	7.77646e+15
			959	LbrM.10.0330	2.35008e+16	959	LbrM.33.0290	5.76655e+15				959	LinJ.32.0440	4.49721e+16	959	LinJ.07.1030	7.70376e+15
			960	LbrM.26.2310	2.34562e+16	960	LbrM.27.1200	5.76499e+15				959	LinJ.24.0040	4.49721e+16	960	LinJ.23.0050	7.69662e+15
			961	LbrM.27.0430	2.33756e+16	961	LbrM.21.0290	5.74557e+15				961	LinJ.26.2250	4.49458e+16	961	LinJ.36.6140	7.64221e+15
			962	LbrM.34.1260	2.33573e+15	962	LbrM.13.0080	5.68128e+15				962	LinJ.14.1160	4.49021e+16	962	LinJ.18.0200	7.62796e+15
			963	LbrM.25.2040	2.30448e+16	963	LbrM.24.1780	5.64207e+15				963	LinJ.19.0250	4.47734e+15	963	LinJ.11.0220	7.43478e+15
			964	LbrM.27.2050	2.271e+15	964	LbrM.34.2920	559034008827568				963	LinJ.13.1350	4.47734e+15	964	LinJ.23.1610	7.3847e+15
			965	LbrM.25.1570	2.24553e+16	965	LbrM.26.2670	5.57979e+15				963	LinJ.01.0030	4.47734e+15	965	LinJ.16.0830	7.37738e+15
			966	LbrM.29.1090	2.23452e+16	966	LbrM.31.3090	5.52118e+15				966	LinJ.36.2460	4.47279e+15	966	LinJ.36.0450	7.36783e+15
			967	LbrM.33.1900	2.21212e+15	967	LbrM.27.0540	5.50937e+15				967	LinJ.21.0180	4.44293e+15	967	LinJ.25.1930	7.33486e+15
			967	LbrM.23.0060	2.21212e+15	968	LbrM.33.0990	550551272758242				968	LinJ.26.0050	4.3679e+15	968	LinJ.33.1740	7.24884e+15
			969	LbrM.33.2790	2.19236e+16	969	LbrM.31.2470	5.49855e+15				969	LinJ.14.0020	4.35463e+15	969	LinJ.35.1190	7.20803e+15
			970	LbrM.13.0750	2.18197e+16	970	LbrM.29.0770	5.48621e+15				970	LinJ.04.0950	4.30578e+16	970	LinJ.31.0210	7.19885e+15
			971	LbrM.19.0290	2.17668e+16	971	LbrM.28.1380	5.46532e+15				971	LinJ.14.1460	4.28724e+15	971	LinJ.21.1290	7.18962e+15
			972	LbrM.20.1830	2.15341e+16	972	LbrM.31.3530	5.46382e+15				972	LinJ.27.0740	4.28559e+16	972	LinJ.07.0930	7.18796e+15
			973	LbrM.35.3650	2.1396e+16	973	LbrM.06.0620	5.44332e+15				973	LinJ.16.0470	4.28251e+16	973	LinJ.13.1060	7.18043e+15
			974	LbrM.24.1000	2.12759e+16	974	LbrM.35.2410	5.4107e+15				974	LinJ.28.1900	4.26485e+15	974	LinJ.27.2170	7.17964e+15
			975	LbrM.14.0920	2.12658e+15	975	LbrM.35.1830	5.39048e+15				975	LinJ.25.2550	4.25183e+16	975	LinJ.29.0920	7.16629e+15
			976	LbrM.33.1790	2.11679e+15	976	LbrM.31.2820	5.38791e+15				976	LinJ.26.0370	4.21224e+15	976	LinJ.09.0770	7.13873e+15
			977	LbrM.25.0080	2.10842e+15	977	LbrM.34.3200	535475287791587				977	LinJ.12.0740	4.18765e+15	977	LinJ.29.1030	7.10539e+15
			978	LbrM.30.0830	2.10473e+16	978	LbrM.33.1110	535452389941384				978	LinJ.32.1570	4.15634e+16	978	LinJ.07.0790	7.06711e+15
			979	LbrM.22.0080	2.08567e+15	979	LbrM.24.0770	5.34631e+15				979	LinJ.24.0770	4.15517e+15	979	LinJ.31.3170	7.03873e+15
			980	LbrM.16.0480	2.08479e+16	980	LbrM.06.0330	5.33732e+15				980	LinJ.28.0560	4.14767e+15	980	LinJ.36.0540	6.98305e+15
			981	LbrM.19.1850	2.07945e+16	981	LbrM.28.3030	5.32614e+15				981	LinJ.24.2330	4.14448e+15	981	LinJ.29.1250	6.93663e+15
			982	LbrM.25.0840	2.07792e+16	982	LbrM.29.2440	5.26984e+15				982	LinJ.28.1210	4.13766e+16	982	LinJ.18.0620	688505761245256
			983	LbrM.32.3920	2.05257e+16	983	LbrM.20.3890	5.26093e+15				983	LinJ.01.0500	4.12471e+15	983	LinJ.10.1260	6.87667e+15
			984	LbrM.30.2700	2.04461e+16	984	LbrM.35.6620	5.19685e+15				984	LinJ.06.0410	4.07757e+15	984	LinJ.29.2580	6.86054e+15
			985	LbrM.32.3240	2.03751e+16	985	LbrM.32.2170	5.17335e+15				985	LinJ.28.0810	4.07473e+16	985	LinJ.09.1020	6.83434e+15
			986	LbrM.14.0760	2.03284e+16	986	LbrM.32.1670	5.09071e+15				986	LinJ.32.2160	4.06092e+16	986	LinJ.05.0970	6.82568e+15
			987	LbrM.35.4670	2.02701e+15	987	LbrM.32.3230	5.08992e+15				986	LinJ.10.0960	4.06092e+16	987	LinJ.32.2330	6.8065e+15
			988	LbrM.34.0370	2.01834e+16	988	LbrM.35.1120	5.07145e+15				988	LinJ.28.1960	4.02208e+16	988	LinJ.06.0350	6.73284e+15
			989	LbrM.20.0320	1.99705e+15	989	LbrM.35.2470	5.03363e+15				989	LinJ.05.0130	3.98638e+16	989	LinJ.34.2190	6.72475e+15
			990	LbrM.26.2160	1.99569e+15	990	LbrM.28.2710	5.0127e+15				990	LinJ.35.4500	3.95494e+15	990	LinJ.21.0480	6.72093e+15
			991	LbrM.29.2270	1.98729e+16	991	LbrM.34.1050	4.96376e+15				991	LinJ.02.0570	3.92663e+15	991	LinJ.36.5620	6.68527e+15
			992	LbrM.33.0660	1.97754e+15	992	LbrM.29.1660	4.95791e+16				992	LinJ.25.0770	3.926e+15	992	LinJ.07.0170	6.67671e+15
			993	LbrM.21.1950	1.97052e+16	993	LbrM.26.0450	4.90183e+15				993	LinJ.31.1070	39088252632674	993	LinJ.36.4040	666699843783913
			994	LbrM.20.0990	1.96598e+16	994	LbrM.01.0360	4.87808e+15				994	LinJ.32.2050	3.87374e+15	994	LinJ.33.1690	665418292729911
			995	LbrM.34.1730	1.96315e+16	995	LbrM.35.3850	4.84257e+15				995	LinJ.13.0990	3.85711e+16	995	LinJ.24.1790	6.6108e+15
			996	LbrM.23.0900	1.91157e+16	996	LbrM.03.0170	4.84141e+15				996	LinJ.29.2350	3.81566e+16	996	LinJ.34.1130	6.6059e+15
			997	LbrM.19.0490	1.90162e+16	997	LbrM.02.0420	4.84061e+16				997	LinJ.35.2790	3.81277e+16	997	LinJ.03.0690	6.57277e+15
			998	LbrM.29.0980	1.8938e+16	998	LbrM.25.0620	4.798e+15				998	LinJ.35.4200	379129532865426	998	LinJ.26.2250	6.56515e+15
			999	LbrM.21.0720	1.86857e+16	999	LbrM.35.2950	4.78678e+15				999	LinJ.30.3150	3.78357e+15	999	LinJ.06.0940	6.54053e+15
			1000	LbrM.28.0650	1.85458e+16	1000	LbrM.18.1550	4.77649e+15				1000	LinJ.10.1440	3.76004e+16	1000	LinJ.29.2970	6.49623e+15
			1001	LbrM.01.0140	1.84056e+16	1001	LbrM.27.2030	4.7741e+15				1001	LinJ.25.2090	3.72911e+15	1001	LinJ.29.2910	6.41895e+15
			1002	LbrM.35.6830	1.83735e+15	1002	LbrM.29.1220	4.76236e+15				1002	LinJ.34.4160	370664556951247	1002	LinJ.09.0100	63954163690022
			1003	LbrM.23.1980	1.82831e+16	1003	LbrM.09.0960	4.72012e+16				1003	LinJ.25.1140	3.7033e+15	1002	LinJ.25.0510	63954163690022
			1004	LbrM.34.0170	1.81564e+15	1004	LbrM.16.0250	4.68314e+15				1004	LinJ.35.0600	3.70288e+16	1002	LinJ.25.0530	63954163690022
			1004	LbrM.32.3400	1.81564e+15	1005	LbrM.30.1330	4.64513e+15				1005	LinJ.36.0390	3.70112e+16	1005	LinJ.32.2600	6.3819e+15
			1004	LbrM.31.2550	1.81564e+15	1006	LbrM.24.1040	4.50865e+15				1006	LinJ.06.0260	3.63828e+16	1006	LinJ.34.1070	6.33202e+15
			1004	LbrM.30.2320	1.81564e+15	1007	LbrM.34.2640	4.49909e+15				1007	LinJ.30.3710	363770891248576	1007	LinJ.26.1800	6.28778e+15
			1004	LbrM.29.2670	1.81564e+15	1008	LbrM.20.2050	4.48281e+15				1008	LinJ.31.2420	360547800618774	1008	LinJ.21.0040	6.254e+15
			1004	LbrM.29.0940	1.81564e+15	1009	LbrM.33.0760	4.48072e+15				1009	LinJ.08.1300	3.58945e+16	1008	LinJ.30.2180	6.254e+15
			1004	LbrM.22.0650	1.81564e+15	1010	LbrM.20.1290	4.47278e+16				1010	LinJ.19.0660	3.56913e+16	1010	LinJ.34.0380	6.24992e+15
			1004	LbrM.18.0950	1.81564e+15	1011	LbrM.31.2760	4.46696e+16				1011	LinJ.29.1530	3.56129e+15	1011	LinJ.13.0050	6.23648e+15
			1004	LbrM.10.1270	1.81564e+15	1012	LbrM.12.0300	437166632165798				1012	LinJ.08.0460	3.55198e+16	1012	LinJ.08.1300	622862626682259
			1004	LbrM.07.0620	1.81564e+15	1013	LbrM.15.1010	4.36105e+15				1013	LinJ.03.0880	3.5404e+16	1013	LinJ.30.2850	6.16994e+15
			1004	LbrM.02.0290	1.81564e+15	1014	LbrM.33.1910	4.36017e+16				1014	LinJ.21.2140	352651350496583	1014	LinJ.35.1840	6.15924e+15
			1015	LbrM.27.2200	1.79495e+16	1015	LbrM.20.4140	4.33894e+15				1015	LinJ.13.0960	3.50057e+15	1015	LinJ.27.1900	6.15604e+15
			1016	LbrM.19.0110	1.76804e+16	1016	LbrM.34.4410	4.30539e+15				1016	LinJ.05.0970	34833587265951	1016	LinJ.15.1540	6.14618e+15
			1017	LbrM.32.2030	1.76754e+16	1017	LbrM.17.0070	4.30366e+15				1017	LinJ.18.0620	3.42819e+15	1017	LinJ.08.0030	6.13687e+15
			1018	LbrM.08.0710	1.76263e+16	1018	LbrM.23.1100	4.28194e+16				1018	LinJ.14.1010	3.40613e+15	1018	LinJ.34.0170	6.11751e+15
			1019	LbrM.29.0780	1.75785e+16	1019	LbrM.20.2160	4.2506e+15				1019	LinJ.18.0900	3.37155e+15	1019	LinJ.33.1560	6.10451e+15
			1020	LbrM.34.0430	1.70756e+15	1020	LbrM.19.0290	4.22265e+16				1020	LinJ.36.5700	3.36301e+15	1020	LinJ.22.1430	6.09372e+15
			1021	LbrM.33.0960	1.70194e+16	1021	LbrM.32.3330	4.20106e+16				1021	LinJ.34.0160	3.29691e+15	1021	LinJ.14.0310	6.03194e+15
			1022	LbrM.34.2280	1.69543e+16	1022	LbrM.06.0650	4.19084e+16				1022	LinJ.28.0520	323046768270933	1022	LinJ.32.2780	598973251564769
			1023	LbrM.19.0640	1.69524e+15	1023	LbrM.35.4080	4.18005e+16				1023	LinJ.30.3000	3.22622e+16	1023	LinJ.29.1780	5.96806e+15
			1024	LbrM.26.2470	1.69373e+16	1024	LbrM.31.0870	4.16053e+16				1024	LinJ.35.1350	3.20748e+15	1024	LinJ.23.0790	5.957e+15
			1025	LbrM.30.2460	1.68198e+16	1025	LbrM.13.1240	4.13307e+15				1025	LinJ.36.0080	3.19732e+15	1025	LinJ.34.2100	5.90972e+15
			1026	LbrM.28.2510	1.66928e+16	1026	LbrM.34.0280	4.12402e+15				1026	LinJ.31.0730	3.16066e+16	1026	LinJ.08.0480	5.88587e+15
			1027	LbrM.35.3420	1.62851e+16	1027	LbrM.35.2240	4.12016e+16				1027	LinJ.07.0790	315248198057234	1026	LinJ.31.2070	5.88587e+15
			1028	LbrM.32.2020	1.60227e+15	1028	LbrM.24.2320	4.07973e+15				1028	LinJ.32.3140	3.14391e+16	1028	LinJ.29.0780	5.84757e+15
			1029	LbrM.35.3250	1.5944e+16	1029	LbrM.23.0050	4.06001e+16				1029	LinJ.36.1050	3.11563e+16	1029	LinJ.27.1710	5.79024e+15
			1030	LbrM.03.0480	1.59262e+16	1030	LbrM.21.2150	4.00707e+16				1030	LinJ.36.5610	3.10872e+16	1030	LinJ.30.1270	5.78928e+15
			1031	LbrM.27.0450	1.57315e+16	1031	LbrM.24.2240	4.00616e+16				1031	LinJ.28.2090	3.09542e+15	1031	LinJ.02.0020	5.7087e+15
			1032	LbrM.34.4760	1.56446e+15	1032	LbrM.23.0750	4.00403e+15				1032	LinJ.21.0600	3.09065e+15	1032	LinJ.31.2830	5.69131e+15
			1033	LbrM.08.0190	1.53532e+16	1033	LbrM.19.0100	4.00271e+16				1033	LinJ.26.1970	3.08864e+15	1033	LinJ.25.2040	5.59247e+15
			1034	LbrM.29.0040	1.5274e+16	1034	LbrM.30.1750	399687175924857				1034	LinJ.18.1600	3.08624e+15	1034	LinJ.24.0040	5.5906e+15
			1035	LbrM.32.1440	1.505e+15	1035	LbrM.28.0790	3.94747e+16				1035	LinJ.36.4650	3.08151e+16	1034	LinJ.32.0440	5.5906e+15
			1036	LbrM.16.1400	1.49603e+16	1036	LbrM.20.4090	3.92682e+16				1036	LinJ.17.0080	3.05948e+15	1036	LinJ.33.2470	5.55087e+15
			1037	LbrM.35.6030	148687176586671	1037	LbrM.15.1480	3.92656e+16				1037	LinJ.24.0780	3.00323e+15	1037	LinJ.21.0060	5.54811e+15
			1038	LbrM.32.1040	1.48288e+16	1038	LbrM.32.1130	3.92007e+15				1038	LinJ.08.0190	2.97116e+16	1038	LinJ.35.1150	5.52463e+15
			1039	LbrM.26.2500	1.4753e+15	1039	LbrM.13.1480	3.91279e+16				1039	LinJ.29.0990	2.93286e+15	1039	LinJ.32.3830	5.45834e+15
			1040	LbrM.35.3890	146748539464092	1040	LbrM.33.2100	3.88023e+16				1040	LinJ.26.0280	2.92342e+16	1040	LinJ.31.3220	5.45161e+15
			1041	LbrM.35.3640	1.46564e+16	1041	LbrM.20.5800	3.87884e+16				1041	LinJ.36.5110	2.91591e+16	1041	LinJ.27.0370	5.41163e+15
			1042	LbrM.30.0490	1.46251e+15	1042	LbrM.28.0550	3.87509e+16				1042	LinJ.13.1090	2.89035e+15	1042	LinJ.28.2290	5.40211e+15
			1043	LbrM.14.0690	1.45498e+16	1043	LbrM.35.2500	3.86587e+15				1043	LinJ.36.5420	2.85412e+15	1043	LinJ.26.0770	5.37463e+15
			1044	LbrM.25.1780	1.45338e+15	1044	LbrM.27.0960	3.8619e+15				1044	LinJ.36.1720	2.84737e+16	1044	LinJ.16.0250	5.33179e+15
			1045	LbrM.32.2280	1.41368e+16	1045	LbrM.06.0410	3.82023e+16				1045	LinJ.07.0130	2.82785e+15	1045	LinJ.32.0070	5.32616e+15
			1046	LbrM.17.0590	1.40213e+15	1046	LbrM.32.2130	3.81236e+16				1046	LinJ.34.3340	2.79994e+15	1046	LinJ.24.0770	5.32615e+15
			1047	LbrM.24.1350	1.37813e+16	1047	LbrM.28.1950	3.79971e+15				1046	LinJ.24.0130	2.79994e+15	1047	LinJ.36.2300	5.32413e+15
			1048	LbrM.23.0300	1.37574e+16	1048	LbrM.13.0270	3.7697e+15				1046	LinJ.03.0460	2.79994e+15	1048	LinJ.35.2230	5.26564e+15
			1049	LbrM.20.2180	1.37239e+15	1049	LbrM.02.0070	3.75694e+15				1049	LinJ.35.4470	2.77953e+16	1049	LinJ.36.3160	5.26371e+15
			1050	LbrM.11.0330	1.36486e+16	1050	LbrM.31.2810	3.745e+15				1050	LinJ.21.1220	2.7723e+16	1050	LinJ.24.2250	5.25158e+15
			1051	LbrM.06.0240	1.36431e+15	1051	LbrM.20.1170	3.72154e+16				1051	LinJ.21.2020	2.75089e+15	1051	LinJ.32.2090	5.21654e+15
			1052	LbrM.30.1970	1.35919e+16	1052	LbrM.34.1760	3.68582e+15				1052	LinJ.26.0200	272265139955469	1052	LinJ.33.0310	5.20613e+15
			1053	LbrM.26.0670	1.35867e+15	1053	LbrM.28.1190	3.68436e+15				1053	LinJ.32.3830	2.71166e+16	1053	LinJ.08.0330	517861897300844
			1054	LbrM.27.0220	1.31278e+15	1054	LbrM.18.1700	3.65647e+16				1054	LinJ.23.1800	2.66615e+16	1054	LinJ.27.0460	5.15067e+15
			1055	LbrM.26.1890	1.3127e+16	1055	LbrM.30.3590	3.63863e+15				1055	LinJ.34.3440	2.63062e+16	1055	LinJ.25.2230	5.14287e+15
			1056	LbrM.06.0650	1.31016e+15	1056	LbrM.35.0450	3.59752e+15				1056	LinJ.34.2450	2.62097e+16	1056	LinJ.12.0001	5.13396e+15
			1057	LbrM.35.6400	1.3095e+15	1057	LbrM.33.1740	3.58872e+15				1057	LinJ.25.2050	2.60421e+16	1057	LinJ.03.0350	5.10983e+15
			1058	LbrM.19.1020	1.2963e+15	1058	LbrM.25.0990	3.56981e+15				1058	LinJ.35.1140	2.59047e+16	1058	LinJ.04.0950	5.10934e+15
			1059	LbrM.23.1000	1.28326e+16	1059	LbrM.21.0170	3.56413e+15				1059	LinJ.10.0330	2.58339e+16	1059	LinJ.03.0360	5.10257e+15
			1060	LbrM.33.2180	1.28293e+16	1060	LbrM.10.0030	354792152875758				1060	LinJ.34.2100	2.52741e+16	1060	LinJ.21.1220	5.05878e+15
			1061	LbrM.35.7070	1.2289e+16	1061	LbrM.34.0750	3.53909e+15				1061	LinJ.32.1120	2.50523e+16	1061	LinJ.36.2360	5.03193e+16
			1062	LbrM.35.3450	1.22119e+16	1062	LbrM.21.1450	3.51553e+15				1062	LinJ.32.0180	2.48058e+16	1062	LinJ.21.1490	4.99203e+16
			1063	LbrM.07.1160	1.21479e+16	1063	LbrM.34.2120	3.50297e+15				1063	LinJ.36.3350	247132631886975	1063	LinJ.24.1050	4.98737e+16
			1064	LbrM.34.1060	1.20933e+16	1064	LbrM.13.0970	3.47454e+15				1064	LinJ.33.1610	2.47012e+16	1064	LinJ.17.0110	4.95004e+15
			1065	LbrM.20.3490	1.20267e+16	1065	LbrM.04.0950	3.46252e+16				1065	LinJ.25.1470	2.46162e+16	1065	LinJ.36.0930	4.9249e+16
			1066	LbrM.20.1950	1.20169e+16	1066	LbrM.03.0810	3.4621e+16				1066	LinJ.36.0660	2.45629e+16	1066	LinJ.36.0190	490085251457915
			1067	LbrM.14.1510	1.1923e+16	1067	LbrM.34.1100	3.42875e+15				1066	LinJ.14.1350	2.45629e+16	1067	LinJ.18.1660	4.89798e+15
			1068	LbrM.31.1310	1.18403e+15	1068	LbrM.05.0770	3.42706e+15				1068	LinJ.30.1660	2.44265e+15	1068	LinJ.35.4490	4.88767e+15
			1069	LbrM.29.0510	1.18057e+15	1069	LbrM.19.0980	3.4173e+15				1069	LinJ.11.0030	2.41207e+16	1069	LinJ.34.1220	4.88517e+15
			1070	LbrM.29.2290	1.16875e+16	1070	LbrM.25.1960	3.39955e+15				1070	LinJ.27.1810	2.38444e+16	1070	LinJ.28.2700	4.8626e+15
			1071	LbrM.26.0450	1.14273e+16	1071	LbrM.20.3990	3.39123e+16				1071	LinJ.35.1730	2.3744e+16	1071	LinJ.35.3930	4.80781e+15
			1072	LbrM.35.1240	1.133e+16	1072	LbrM.35.5130	3.33878e+16				1072	LinJ.22.1010	2.36177e+16	1072	LinJ.15.1060	4.79434e+16
			1073	LbrM.28.1620	1.13113e+15	1073	LbrM.21.1210	3.32754e+15				1073	LinJ.32.0550	2.34888e+16	1073	LinJ.24.2300	4.78964e+15
			1074	LbrM.10.0060	1.12206e+15	1074	LbrM.34.1450	3.27801e+16				1074	LinJ.23.0980	2.34031e+16	1074	LinJ.26.2700	4.73743e+15
			1075	LbrM.25.1640	1.12138e+16	1075	LbrM.16.0940	3.27198e+15				1075	LinJ.33.2650	2.29895e+16	1075	LinJ.34.3160	4.70147e+16
			1076	LbrM.09.1490	1.11751e+15	1076	LbrM.28.1100	3.27081e+16				1076	LinJ.27.0370	2.26052e+15	1076	LinJ.01.0330	4.66268e+16
			1077	LbrM.31.0230	1.10004e+16	1077	LbrM.34.1640	3.25765e+16				1077	LinJ.09.0980	2.25978e+16	1077	LinJ.36.0490	4.66114e+15
			1078	LbrM.35.4420	1.08917e+15	1078	LbrM.32.2000	3.16075e+15				1078	LinJ.30.0770	2.25861e+16	1078	LinJ.15.1030	4.65449e+15
			1079	LbrM.23.0750	1.08475e+16	1079	LbrM.35.0550	3.1504e+15				1079	LinJ.26.0630	2.25342e+16	1079	LinJ.32.1570	4.64388e+16
			1080	LbrM.26.0210a	1.06473e+16	1080	LbrM.34.4130	3.14294e+16				1080	LinJ.14.0840	222996709811065	1080	LinJ.20.1610	4.63294e+16
			1081	LbrM.30.1070	1.06128e+15	1081	LbrM.27.1690	313757435057736				1081	LinJ.26.2600	2.22034e+16	1081	LinJ.29.0260	4.61464e+16
			1082	LbrM.20.4670	1.05788e+16	1082	LbrM.35.2560	3.10597e+16				1082	LinJ.29.0290	2.20911e+16	1082	LinJ.33.3340	4.57876e+16
			1083	LbrM.30.0130	1.05545e+16	1083	LbrM.06.0570	3.10554e+16				1083	LinJ.26.2400	2.19771e+16	1083	LinJ.25.0580	4.5571e+15
			1084	LbrM.05.0130	1.05261e+16	1084	LbrM.28.1510	305353258061686				1084	LinJ.36.3580	2.17925e+16	1084	LinJ.12.0100	4.55247e+15
			1085	LbrM.30.1220	1.04159e+16	1085	LbrM.20.1540	3.04868e+15				1085	LinJ.15.0130	2.17558e+16	1085	LinJ.17.0070	4.5461e+16
			1086	LbrM.25.0750	1.00349e+16	1086	LbrM.18.0960	3.04686e+15				1086	LinJ.23.1450	2.15782e+16	1086	LinJ.28.0810	4.53192e+15
			1087	LbrM.28.2480	9.9899e+15	1087	LbrM.32.0500	3.01832e+15				1087	LinJ.03.0550	2.10429e+16	1087	LinJ.25.2550	4.52835e+15
			1088	LbrM.17.0210	9.94366e+15	1088	LbrM.32.2150	2.99282e+16				1088	LinJ.28.2480	2.10283e+16	1088	LinJ.10.0200	4.51094e+16
			1089	LbrM.34.2610	9.84183e+15	1089	LbrM.25.1760	2.96753e+15				1089	LinJ.35.0330	2.09651e+16	1089	LinJ.34.2620	4.50914e+15
			1090	LbrM.13.1400	9.76258e+15	1090	LbrM.32.1160	2.96371e+16				1090	LinJ.32.1340	2.07282e+16	1090	LinJ.30.3150	4.49979e+15
			1091	LbrM.30.1870	9.67393e+15	1091	LbrM.18.1640	2.91536e+16				1091	LinJ.35.1810	2.06786e+16	1091	LinJ.35.3450	4.46342e+15
			1092	LbrM.01.0210	9.65919e+15	1092	LbrM.28.2160	2.86466e+15				1092	LinJ.26.0770	2.06496e+16	1092	LinJ.05.1100	4.44621e+16
			1093	LbrM.15.1540	9.58346e+15	1093	LbrM.07.0280	2.84104e+16				1093	LinJ.32.2380	2.06415e+15	1093	LinJ.21.0180	4.44392e+15
			1094	LbrM.15.0130	9.32496e+15	1094	LbrM.19.1850	2.79778e+15				1094	LinJ.08.1280	2.00731e+16	1094	LinJ.31.2570	4.43694e+16
			1095	LbrM.23.1310	9.28375e+15	1095	LbrM.28.0280	2.78305e+16				1095	LinJ.22.0009	1.99614e+16	1095	LinJ.33.2670	4.43322e+15
			1096	LbrM.24.1510	9.26108e+15	1096	LbrM.18.0220	2.77113e+16				1096	LinJ.09.1500	1.99594e+15	1096	LinJ.03.0150	4.42033e+15
			1097	LbrM.29.2320	919069057264132	1097	LbrM.34.3310	2.76939e+15				1097	LinJ.36.0060	1.98866e+16	1097	LinJ.16.0070	4.40751e+16
			1098	LbrM.35.2370	9.16371e+15	1098	LbrM.10.1110	2.76653e+15				1098	LinJ.34.0370	1.98631e+16	1098	LinJ.07.0430	4.38474e+16
			1099	LbrM.35.1030	9.0496e+15	1099	LbrM.35.5720	2.75214e+15				1099	LinJ.01.0110	1.95737e+16	1099	LinJ.25.2480	4.38025e+15
			1099	LbrM.35.1020	9.0496e+15	1100	LbrM.31.1280	2.74626e+16				1100	LinJ.23.0060	1.95666e+16	1100	LinJ.06.0290	4.36678e+16
			1099	LbrM.32.0330	9.0496e+15	1101	LbrM.22.0750	2.71086e+15				1101	LinJ.26.0730	1.95052e+16	1101	LinJ.21.0870	4.3631e+15
			1099	LbrM.30.3040	9.0496e+15	1102	LbrM.14.1080	2.70802e+16				1102	LinJ.28.1580	1.9501e+16	1102	LinJ.26.0280	4.33451e+16
			1099	LbrM.30.0680	9.0496e+15	1103	LbrM.33.0830	2.66879e+16				1103	LinJ.35.0130	1.94461e+16	1103	LinJ.16.0940	4.32184e+15
			1099	LbrM.27.2680	9.0496e+15	1104	LbrM.15.1470	2.65737e+16				1103	LinJ.32.3310	1.94461e+16	1104	LinJ.19.0710	4.30998e+15
			1099	LbrM.27.1510	9.0496e+15	1105	LbrM.20.0890	264926621129667				1103	LinJ.30.2380	1.94461e+16	1105	LinJ.36.2090	4.24029e+16
			1099	LbrM.17.0370	9.0496e+15	1106	LbrM.35.6830	2.64434e+15				1103	LinJ.29.0950	1.94461e+16	1106	LinJ.25.0770	4.22122e+16
			1099	LbrM.10.0620	9.0496e+15	1107	LbrM.34.4100	263436176042048				1103	LinJ.22.0640	1.94461e+16	1107	LinJ.35.1020	4.17552e+16
			1099	LbrM.05.0400	9.0496e+15	1108	LbrM.28.2970	2.63379e+15				1103	LinJ.17.0110	1.94461e+16	1108	LinJ.07.1000	4.16524e+15
			1109	LbrM.34.4010	886539116373451	1109	LbrM.16.1430	2.59194e+15				1103	LinJ.13.0220	1.94461e+16	1109	LinJ.36.2460	4.14109e+15
			1110	LbrM.21.0100	8.85917e+15	1110	LbrM.26.0320	2.54342e+16				1103	LinJ.10.1250	1.94461e+16	1110	LinJ.27.0740	4.12317e+15
			1111	LbrM.30.2030	8.8388e+15	1111	LbrM.31.0140	2.54244e+15				1103	LinJ.07.0610	1.94461e+16	1111	LinJ.28.3040	4.08009e+15
			1112	LbrM.20.2300	860534307617406	1112	LbrM.21.0060	2.54188e+16				1103	LinJ.02.0230	1.94461e+16	1112	LinJ.36.3600	4.0424e+16
			1113	LbrM.19.1370	8.51699e+15	1113	LbrM.28.1620	2.52396e+16				1113	LinJ.24.1010	1.93964e+15	1113	LinJ.34.4090	3.98972e+15
			1114	LbrM.32.2450	8.47073e+15	1114	LbrM.02.0580	2.49539e+16				1114	LinJ.32.1910	1.90297e+16	1114	LinJ.06.0410	3.98689e+15
			1115	LbrM.27.0060	8.23177e+15	1115	LbrM.34.3230	2.48628e+16				1115	LinJ.33.0670	1.89948e+16	1115	LinJ.25.1140	3.9635e+16
			1116	LbrM.22.0060	819134721083558	1116	LbrM.26.0500	2.47633e+16				1116	LinJ.30.2740	1.84363e+16	1116	LinJ.28.1900	3.96159e+16
			1117	LbrM.20.0770	8.07087e+15	1117	LbrM.26.2500	2.47374e+16				1117	LinJ.23.0820	1.82882e+15	1117	LinJ.35.4500	3.95422e+16
			1118	LbrM.20.4460	8.03513e+15	1118	LbrM.27.0430	2.4275e+16				1118	LinJ.34.1090	1.82151e+16	1118	LinJ.29.1330	3.95094e+15
			1119	LbrM.15.1360	8.01834e+15	1119	LbrM.07.0780	2.41969e+16				1119	LinJ.29.2410	1.81653e+16	1119	LinJ.28.1210	3.91125e+16
			1120	LbrM.30.0920	7.88377e+15	1120	LbrM.16.0840	2.41719e+16				1120	LinJ.26.0420	1.80492e+16	1120	LinJ.28.0560	389091192547943
			1121	LbrM.31.2520	7.61143e+15	1121	LbrM.29.0980	2.39228e+16				1121	LinJ.26.1680	1.79096e+16	1121	LinJ.30.3710	3.85175e+15
			1122	LbrM.14.1350	7.60466e+15	1122	LbrM.32.0970	2.34774e+16				1122	LinJ.35.4860	1.77939e+16	1122	LinJ.01.0270	3.83702e+16
			1123	LbrM.16.0890	7.46833e+15	1123	LbrM.29.1530	2.31725e+16				1123	LinJ.19.0320	1.77829e+15	1123	LinJ.36.5040	3.83109e+15
			1124	LbrM.31.1830	7.40659e+15	1124	LbrM.34.1260	2.31189e+16				1124	LinJ.08.0830	1.7729e+16	1124	LinJ.33.2700	3.82472e+16
			1125	LbrM.35.5440	7.39671e+15	1125	LbrM.33.1880	2.28253e+16				1125	LinJ.28.3240	1.75506e+16	1125	LinJ.14.0020	3.78451e+15
			1126	LbrM.18.0390	7.37878e+15	1126	LbrM.21.0600	2.28093e+15				1126	LinJ.29.0790	1.75267e+15	1126	LinJ.26.1970	3.70748e+15
			1127	LbrM.03.0100	7.33622e+15	1127	LbrM.34.4730	2.27494e+16				1127	LinJ.25.0080	1.7442e+16	1127	LinJ.06.0260	3.67721e+15
			1128	LbrM.01.0550	7.29458e+15	1128	LbrM.34.5080	2.27229e+16				1128	LinJ.35.2380	1.7435e+16	1128	LinJ.01.0030	3.66871e+16
			1129	LbrM.34.5140	725344620345259	1129	LbrM.33.2790	2.27188e+16				1129	LinJ.32.1940	1.74334e+15	1129	LinJ.21.2140	3.66088e+15
			1130	LbrM.33.0320	7.09797e+15	1130	LbrM.22.1020	2.25648e+16				1130	LinJ.34.2730	1.74146e+16	1130	LinJ.35.0600	3.64746e+15
			1131	LbrM.14.0720	7.07678e+15	1131	LbrM.20.3180	2.23031e+16				1131	LinJ.24.1570	1.741e+16	1131	LinJ.36.0390	3.64386e+16
			1132	LbrM.29.0260	7.074e+15	1132	LbrM.28.1410	2.2073e+16				1132	LinJ.36.6780	1.71092e+16	1132	LinJ.24.2330	3.63029e+16
			1133	LbrM.31.2980	699514330197678	1133	LbrM.10.0330	2.19517e+16				1133	LinJ.13.1590	1.70513e+15	1133	LinJ.25.0990	3.58821e+15
			1134	LbrM.31.2680	6.97858e+15	1134	LbrM.08.0500	2.16139e+15				1134	LinJ.32.1930	1.69134e+16	1134	LinJ.31.3060	354847210551577
			1135	LbrM.28.0700	6.95346e+15	1134	LbrM.31.2290	2.16139e+15				1135	LinJ.13.0830	1.68638e+16	1135	LinJ.34.3380	3.54618e+15
			1136	LbrM.29.2850	6.92727e+15	1136	LbrM.22.0080	2.15974e+16				1136	LinJ.14.0470	1.66149e+15	1136	LinJ.18.0900	3.54405e+15
			1137	LbrM.35.2160	6.84709e+15	1137	LbrM.29.2220	2.15868e+15				1137	LinJ.30.2180	1.64578e+16	1137	LinJ.32.2050	3.52712e+15
			1138	LbrM.21.0730	6.82199e+15	1138	LbrM.13.0750	2.1525e+16				1137	LinJ.21.0040	1.64578e+16	1138	LinJ.35.1740	3.5083e+15
			1139	LbrM.34.3010	6.79389e+15	1139	LbrM.24.1000	2.12995e+16				1139	LinJ.34.0070	1.64547e+16	1139	LinJ.31.1070	3.47185e+16
			1140	LbrM.30.2490	6.77726e+15	1140	LbrM.25.2180	2.12914e+16				1140	LinJ.14.0520	1.62815e+16	1140	LinJ.03.0460	3.43075e+15
			1140	LbrM.20.3100	6.77726e+15	1141	LbrM.16.0480	2.10432e+16				1141	LinJ.06.0670	1.62543e+16	1140	LinJ.24.0130	3.43075e+15
			1142	LbrM.16.0090	6.72053e+15	1142	LbrM.35.2550	2.09597e+16				1142	LinJ.35.2500	1.61199e+16	1140	LinJ.34.3340	3.43075e+15
			1143	LbrM.22.0750	6.5877e+15	1143	LbrM.11.0330	2.08829e+16				1143	LinJ.34.2220	1.61125e+16	1143	LinJ.10.1440	3.39958e+15
			1144	LbrM.09.0230	6.5438e+15	1144	LbrM.21.0720	2.08585e+16				1144	LinJ.28.0670	1.60643e+16	1144	LinJ.12.0007	3.39729e+16
			1145	LbrM.14.0470	643476010136378	1145	LbrM.34.4380	2.08409e+16				1145	LinJ.27.1940	1.59693e+16	1145	LinJ.14.1010	336578406815328
			1146	LbrM.25.1400	6.27134e+16	1146	LbrM.35.7010	2.08375e+15				1146	LinJ.30.2030	1.59158e+15	1146	LinJ.03.0880	3.35854e+15
			1147	LbrM.19.1440	6.24781e+16	1147	LbrM.30.0830	2.07483e+16				1147	LinJ.14.0760	1.59078e+16	1147	LinJ.19.0660	3.3186e+15
			1148	LbrM.35.1980	6.21841e+16	1148	LbrM.26.1550	2.06019e+16				1148	LinJ.36.3380	1.58744e+16	1148	LinJ.29.0010	3.28903e+16
			1149	LbrM.25.0020	6.04433e+15	1149	LbrM.20.5180	2.05964e+16				1149	LinJ.36.3570	1.57937e+16	1149	LinJ.17.0890	3.26994e+16
			1150	LbrM.12.0080	6.03933e+16	1150	LbrM.32.0240	2.05561e+16				1150	LinJ.29.1100	1.57321e+15	1150	LinJ.36.5610	3.26582e+16
			1151	LbrM.35.2600	5.94149e+16	1151	LbrM.16.1090	2.03809e+16				1151	LinJ.34.3300	1.51957e+16	1151	LinJ.28.2090	3.25849e+16
			1152	LbrM.27.1920	5.88507e+15	1152	LbrM.34.1730	2.02908e+16				1151	LinJ.30.2520	1.51957e+16	1152	LinJ.08.0460	3.20693e+15
			1153	LbrM.33.0060	5.81741e+16	1153	LbrM.22.0650	1.97781e+15				1153	LinJ.19.1620	1.51805e+15	1153	LinJ.34.1800	320253069230004
			1154	LbrM.16.0800	5.80814e+16	1153	LbrM.32.3400	1.97781e+15				1154	LinJ.36.3180	1.48756e+16	1154	LinJ.13.1530	31881767391074
			1155	LbrM.30.1180	5.64538e+15	1153	LbrM.02.0290	1.97781e+15				1155	LinJ.26.2560	1.47572e+15	1155	LinJ.36.5110	3.18815e+15
			1156	LbrM.34.0150	5.48221e+15	1153	LbrM.18.0950	1.97781e+15				1156	LinJ.32.2200	1.46979e+15	1156	LinJ.29.0990	3.17847e+15
			1157	LbrM.27.2700	5.47864e+16	1157	LbrM.25.1530	1.95933e+16				1157	LinJ.16.1420	1.45586e+16	1157	LinJ.34.4020	3.14159e+15
			1158	LbrM.10.0740	5.40409e+16	1158	LbrM.33.1790	1.95653e+16				1158	LinJ.30.0420	1.42957e+15	1158	LinJ.31.0730	3.12894e+15
			1159	LbrM.23.0330	5.39919e+15	1159	LbrM.23.1650	1.9469e+16				1159	LinJ.30.1160	1.42799e+15	1159	LinJ.31.2420	3.12129e+15
			1160	LbrM.30.0400	5.39261e+15	1160	LbrM.23.0540	1.93992e+16				1160	LinJ.29.0260	140324688251235	1160	LinJ.34.3440	3.07608e+15
			1161	LbrM.25.1930	5.35772e+15	1161	LbrM.35.3420	1.92413e+16				1161	LinJ.29.1950	1.40181e+15	1161	LinJ.14.0910	3.06971e+15
			1162	LbrM.20.2210	5.35385e+16	1162	LbrM.20.0320	1.91709e+16				1162	LinJ.32.2150	1.40035e+16	1162	LinJ.26.0050	3.05248e+16
			1163	LbrM.35.0730	5.29548e+15	1163	LbrM.19.1220	1.9094e+16				1163	LinJ.32.1920	1.38344e+16	1163	LinJ.36.1050	2.99893e+16
			1164	LbrM.07.0010	5.27879e+15	1164	LbrM.14.0920	1.90691e+16				1164	LinJ.25.2300	1.36923e+16	1164	LinJ.14.1160	2.99735e+15
			1165	LbrM.03.0240	5.05819e+15	1165	LbrM.23.1520	1.90555e+15				1165	LinJ.32.1000	1.36745e+16	1165	LinJ.36.3350	2.96221e+15
			1166	LbrM.06.0390	4.97258e+15	1166	LbrM.16.1360	1.88981e+16				1166	LinJ.23.0310	1.36692e+16	1166	LinJ.11.0640	2.93862e+16
			1167	LbrM.24.1320	4.93142e+15	1167	LbrM.29.2270	1.88368e+16				1167	LinJ.14.1420	1.35503e+16	1167	LinJ.18.1600	2.93746e+15
			1168	LbrM.25.0380	4.89345e+15	1168	LbrM.14.1300	1.86659e+16				1168	LinJ.36.6350	1.35403e+16	1168	LinJ.23.1050	293684533708768
			1169	LbrM.20.5870	4.8585e+15	1169	LbrM.20.5450	1.8641e+15				1169	LinJ.02.0020	1.34466e+15	1169	LinJ.21.0070	2.91391e+15
			1170	LbrM.06.0140	4.7858e+15	1170	LbrM.21.1950	1.85811e+15				1170	LinJ.36.4380	1.34064e+16	1170	LinJ.35.1140	2.87602e+16
			1171	LbrM.26.0700	4.72291e+15	1171	LbrM.27.2050	1.85218e+16				1171	LinJ.30.1010	1.33341e+16	1171	LinJ.35.2790	2.86752e+16
			1172	LbrM.32.2780	4.68339e+15	1172	LbrM.01.0140	1.84993e+16				1172	LinJ.31.2950	1.32903e+15	1172	LinJ.32.1090	2.85589e+16
			1173	LbrM.10.0690	4.67504e+15	1173	LbrM.31.2060	1.83424e+16				1173	LinJ.35.1160	1.32751e+16	1173	LinJ.23.1660	2.85475e+15
			1174	LbrM.34.1150	4.62269e+15	1174	LbrM.26.0060	1.81068e+15				1174	LinJ.25.2160	1.31427e+16	1174	LinJ.27.0580	2.83116e+16
			1175	LbrM.09.0090	4.62052e+15	1175	LbrM.12.0080	1.8079e+15				1175	LinJ.17.0660	1.30985e+15	1175	LinJ.28.0520	2.82708e+16
			1176	LbrM.25.2210	454714792952405	1176	LbrM.27.2200	1.80142e+15				1176	LinJ.36.2050	1.29787e+16	1176	LinJ.36.5420	2.81317e+16
			1177	LbrM.05.0360	4.54092e+16	1177	LbrM.15.0160	1.798e+16				1177	LinJ.36.3840	1.29116e+16	1177	LinJ.35.4200	28071560481223
			1178	LbrM.35.5630	4.52119e+15	1178	LbrM.29.0780	1.78066e+16				1178	LinJ.20.0490	1.28243e+16	1178	LinJ.35.0330	2.80186e+16
			1179	LbrM.20.0670	4.50321e+15	1179	LbrM.31.2830	1.76816e+16				1179	LinJ.36.0970	1.24729e+16	1179	LinJ.32.3140	2.79448e+16
			1180	LbrM.01.0540	4.49945e+15	1180	LbrM.14.0690	1.76785e+16				1179	LinJ.36.0960	1.24729e+16	1180	LinJ.19.0730	2.77511e+16
			1181	LbrM.24.1330	4.43166e+15	1181	LbrM.17.1270	1.75237e+16				1179	LinJ.32.0270	1.24729e+16	1181	LinJ.36.0080	2.76659e+16
			1182	LbrM.26.0910	4.34997e+15	1182	LbrM.20.0720	1.74165e+16				1179	LinJ.30.3090	1.24729e+16	1182	LinJ.11.0270	2.75001e+16
			1183	LbrM.03.0070	4.32289e+16	1183	LbrM.06.0890	1.73992e+16				1179	LinJ.17.0440	1.24729e+16	1183	LinJ.08.0950	2.7461e+15
			1184	LbrM.20.1360	4.31883e+15	1184	LbrM.35.4670	1.73564e+15				1179	LinJ.10.0540	1.24729e+16	1184	LinJ.21.2020	2.73102e+15
			1185	LbrM.34.5190	4.31286e+16	1185	LbrM.34.0370	1.73013e+15				1179	LinJ.05.0390	1.24729e+16	1185	LinJ.31.2590	2.72649e+16
			1186	LbrM.35.0620	4.25069e+15	1186	LbrM.26.2310	1.6796e+16				1186	LinJ.23.1080	1.24535e+16	1186	LinJ.16.0470	2.68371e+16
			1187	LbrM.10.1110	4.23974e+15	1187	LbrM.29.0040	1.66852e+16				1187	LinJ.18.1380	1.234e+16	1187	LinJ.08.0190	2.68248e+15
			1188	LbrM.35.2340	4.22201e+15	1188	LbrM.20.0990	1.65277e+16				1188	LinJ.20.0270	1.22733e+16	1188	LinJ.21.0600	2.66677e+16
			1189	LbrM.21.1130	4.21922e+16	1189	LbrM.34.4260	1.63602e+16				1189	LinJ.34.3690	1.22415e+16	1189	LinJ.35.1350	2.66231e+15
			1190	LbrM.23.0990	4.21674e+15	1190	LbrM.31.2600	1.62458e+16				1190	LinJ.31.1110	1.22105e+15	1190	LinJ.29.2350	2.64377e+16
			1191	LbrM.28.3220	4.17666e+15	1191	LbrM.33.2180	1.60254e+16				1191	LinJ.11.0770	1.21119e+15	1191	LinJ.30.2780	2.635e+15
			1192	LbrM.33.2890	417652055641454	1192	LbrM.35.6380	1.60166e+16				1192	LinJ.36.5830	1.20081e+16	1192	LinJ.36.4650	2.6326e+16
			1193	LbrM.06.0570	4.15525e+15	1193	LbrM.35.6400	1.59452e+16				1193	LinJ.22.0330	1.18778e+16	1193	LinJ.36.5700	2.60689e+16
			1194	LbrM.28.1750	4.15433e+15	1194	LbrM.35.1240	1.59227e+16				1194	LinJ.19.0710	1.18304e+16	1194	LinJ.02.0570	2.5911e+15
			1195	LbrM.25.1170	4.08128e+16	1195	LbrM.30.2560	1.58639e+15				1195	LinJ.05.0360	1.18037e+16	1195	LinJ.13.1090	256122675669841
			1196	LbrM.27.0500	3.99855e+15	1196	LbrM.21.0070	1.58424e+15				1196	LinJ.07.1260	1.17024e+16	1196	LinJ.36.4670	2.55093e+16
			1197	LbrM.13.1000	3.93689e+15	1197	LbrM.27.2620	1.58299e+16				1197	LinJ.23.0220	1.16808e+15	1197	LinJ.34.4160	2.5364e+16
			1198	LbrM.35.5510	3.92665e+15	1198	LbrM.28.0650	1.57139e+16				1198	LinJ.10.0040	1.16291e+15	1198	LinJ.25.1470	2.53335e+16
			1199	LbrM.32.4130	3.90371e+16	1199	LbrM.30.2700	1.57023e+15				1199	LinJ.35.0110	1.15279e+16	1199	LinJ.34.0850	2.50305e+16
			1200	LbrM.06.1270	3.8819e+15	1200	LbrM.32.1440	1.56267e+16				1200	LinJ.36.2260	1.14818e+16	1200	LinJ.36.2390	2.46862e+16
			1201	LbrM.09.1000	3.75327e+16	1201	LbrM.14.0760	1.55641e+15				1201	LinJ.36.7020	1.13422e+16	1201	LinJ.36.1720	2.46788e+15
			1202	LbrM.34.2940	3.70886e+16	1202	LbrM.13.0190	1.54512e+16				1202	LinJ.33.2010	1.12194e+16	1202	LinJ.06.1220	2.44998e+16
			1203	LbrM.13.0080	3.6965e+15	1203	LbrM.09.0970	1.52045e+16				1203	LinJ.35.5160	1.11716e+16	1203	LinJ.31.3280	2.44174e+16
			1204	LbrM.01.0520	3.55656e+16	1204	LbrM.34.0430	1.51382e+16				1204	LinJ.33.2100	1.11197e+15	1204	LinJ.27.0980	2.43912e+16
			1205	LbrM.29.1710	3.55339e+16	1205	LbrM.31.1830	1.50434e+16				1205	LinJ.24.1410	1.09255e+16	1205	LinJ.33.1610	2.43817e+16
			1206	LbrM.13.0530	3.53353e+15	1206	LbrM.15.0910	1.49943e+16				1206	LinJ.34.4360	1.09212e+16	1206	LinJ.13.0160	2.41957e+16
			1207	LbrM.22.1130	3.45955e+15	1207	LbrM.35.2970	1.49922e+16				1207	LinJ.31.1130	1.09104e+16	1207	LinJ.34.2450	2.37804e+16
			1208	LbrM.07.0050	3.43058e+15	1208	LbrM.23.0900	1.48185e+15				1208	LinJ.17.0280	1.08041e+16	1208	LinJ.32.0550	2.37073e+16
			1209	LbrM.33.1110	3.23078e+16	1209	LbrM.32.2870	1.4777e+16				1209	LinJ.16.1380	1.05523e+16	1209	LinJ.10.0330	2.36086e+15
			1210	LbrM.35.6900	3.22739e+15	1210	LbrM.06.0870	1.47472e+16				1210	LinJ.30.2090	1.0485e+16	1210	LinJ.32.0180	2.34012e+16
			1211	LbrM.34.3580	3.21024e+16	1211	LbrM.23.0060	1.44774e+16				1211	LinJ.29.0030	1.0408e+15	1211	LinJ.32.1120	2.29184e+15
			1212	LbrM.09.1140	3.14293e+15	1211	LbrM.33.1900	1.44774e+16				1212	LinJ.31.2320	1.03537e+16	1212	LinJ.30.1660	2.28604e+16
			1213	LbrM.29.0030	3.12613e+16	1213	LbrM.30.0490	1.44349e+16				1213	LinJ.30.1910	1.02504e+15	1213	LinJ.14.1350	2.24402e+16
			1214	LbrM.20.5020	3.09537e+16	1214	LbrM.25.0080	1.44083e+15				1214	LinJ.15.1610	1.02474e+16	1213	LinJ.36.0660	2.24402e+16
			1215	LbrM.18.1020	3.09308e+15	1215	LbrM.35.3650	1.43766e+16				1215	LinJ.25.0900	1.01055e+16	1215	LinJ.23.1800	2.22761e+15
			1216	LbrM.32.0780	3.03656e+16	1216	LbrM.32.2280	1.43294e+15				1216	LinJ.13.0300	1.00247e+16	1216	LinJ.19.1620	2.22707e+15
			1216	LbrM.22.0550	3.03656e+16	1217	LbrM.27.0300	1.43238e+16				1217	LinJ.21.0730	990113020165303	1217	LinJ.26.0630	2.16866e+16
			1216	LbrM.20.0900	3.03656e+16	1218	LbrM.08.0190	1.43234e+15				1218	LinJ.36.2450	983163118790401	1218	LinJ.03.0120	2.14909e+16
			1216	LbrM.15.0920	3.03656e+16	1219	LbrM.20.0730	1.428e+16				1219	LinJ.35.5060	9.80435e+15	1219	LinJ.33.1040	2.12336e+16
			1216	LbrM.13.1440	3.03656e+16	1220	LbrM.19.0640	1.42545e+15				1220	LinJ.35.3080	972656880683402	1220	LinJ.35.1810	2.11143e+16
			1216	LbrM.04.0880	3.03656e+16	1221	LbrM.14.1040	1.42305e+16				1221	LinJ.34.0890	9.63555e+15	1221	LinJ.08.0080	2.11105e+15
			1216	LbrM.02.0420	3.03656e+16	1222	LbrM.26.2470	1.41334e+16				1222	LinJ.21.1120	9.60721e+15	1222	LinJ.33.2650	2.10113e+16
			1223	LbrM.34.1180	300346491635538	1223	LbrM.25.1780	1.4012e+15				1223	LinJ.36.6000	957849703687614	1223	LinJ.06.0670	2.09521e+16
			1223	LbrM.28.0410	300346491635538	1224	LbrM.35.3250	1.39068e+16				1224	LinJ.36.1170	9.40461e+15	1224	LinJ.34.0830	2.07392e+16
			1225	LbrM.32.3030	2.99966e+16	1225	LbrM.16.1400	1.38977e+15				1225	LinJ.35.4080	9.37122e+15	1225	LinJ.26.0200	2.06333e+16
			1226	LbrM.35.0650	2.99889e+15	1226	LbrM.27.1720	1.38449e+16				1226	LinJ.29.2460	9.08675e+15	1226	LinJ.30.0770	2.05342e+15
			1227	LbrM.20.1580	2.94459e+15	1227	LbrM.19.0110	1.3695e+16				1227	LinJ.31.2710	9.04382e+15	1227	LinJ.28.1580	2.03584e+16
			1228	LbrM.34.1020	2.8334e+15	1228	LbrM.22.0120	1.36447e+16				1228	LinJ.30.1920	8.88822e+15	1228	LinJ.23.1450	2.0335e+16
			1229	LbrM.05.0730	2.81409e+15	1229	LbrM.23.0300	1.35913e+16				1229	LinJ.34.2580	8.86949e+15	1229	LinJ.36.6850	2.02467e+15
			1230	LbrM.34.1170	2.79462e+16	1230	LbrM.28.2510	1.35542e+15				1230	LinJ.36.1890	8.85489e+15	1230	LinJ.32.1340	2.02337e+16
			1231	LbrM.15.0050	2.78827e+16	1231	LbrM.35.0150	1.34389e+16				1231	LinJ.22.0007	8.85383e+15	1231	LinJ.35.4350	1.98265e+15
			1232	LbrM.13.0770	264127048760397	1232	LbrM.35.3890	1.34351e+16				1232	LinJ.21.0100	8.81078e+15	1232	LinJ.09.1500	1.97657e+16
			1233	LbrM.34.1930	2.61744e+15	1233	LbrM.29.2290	1.34138e+16				1233	LinJ.35.3110	8.68904e+15	1233	LinJ.34.2430	1.96712e+16
			1234	LbrM.30.2120	2.59859e+16	1234	LbrM.23.1000	1.3409e+15				1234	LinJ.35.2760	8.59464e+15	1234	LinJ.32.1130	1.92488e+16
			1234	LbrM.21.0040	2.59859e+16	1235	LbrM.32.1040	1.33972e+16				1235	LinJ.33.0340	8.41715e+15	1235	LinJ.29.0290	1.91387e+16
			1236	LbrM.23.1520	2.57185e+16	1236	LbrM.19.0490	1.32975e+16				1236	LinJ.29.0330	8.40082e+15	1236	LinJ.34.0370	1.8695e+16
			1237	LbrM.27.1790	2.51782e+16	1237	LbrM.20.2180	1.30897e+16				1237	LinJ.19.0970	8.22461e+15	1237	LinJ.14.0520	1.86518e+16
			1238	LbrM.35.5430	2.51387e+16	1238	LbrM.29.1090	1.30032e+16				1238	LinJ.31.2470	8.20976e+15	1238	LinJ.24.1560	1.85813e+16
			1239	LbrM.17.0690	2.49704e+15	1239	LbrM.32.2020	1.29798e+16				1239	LinJ.36.3160	818584329720721	1239	LinJ.26.2400	1.83396e+16
			1240	LbrM.20.3820	2.47656e+16	1240	LbrM.27.0220	1.29615e+15				1240	LinJ.27.0050	8.15953e+15	1240	LinJ.23.0980	1.82807e+16
			1241	LbrM.20.5150	2.27839e+16	1241	LbrM.16.1370	1.29518e+16				1241	LinJ.14.0800	8.0452e+15	1241	LinJ.29.2410	1.82619e+15
			1242	LbrM.20.4100	2.27769e+15	1242	LbrM.06.0240	1.28872e+15				1242	LinJ.14.1260	801319165358413	1242	LinJ.22.0009	1.81344e+16
			1243	LbrM.25.2550	2.24381e+16	1243	LbrM.35.7070	1.28736e+16				1243	LinJ.21.0720	7.96898e+15	1243	LinJ.15.0050	1.79786e+16
			1244	LbrM.17.1030	2.2361e+15	1244	LbrM.34.2790	1.27617e+16				1244	LinJ.33.2750	7.84816e+15	1244	LinJ.27.1810	1.79541e+16
			1245	LbrM.27.0630	2.21614e+16	1245	LbrM.15.0050	1.27272e+16				1245	LinJ.09.0380	7.57159e+15	1245	LinJ.31.1130	1.77888e+16
			1246	LbrM.18.0380	2.16885e+15	1246	LbrM.14.1510	1.26293e+16				1246	LinJ.20.0280	7.56568e+15	1246	LinJ.36.6780	1.76967e+16
			1247	LbrM.31.0930	2.13283e+16	1247	LbrM.23.1330	1.25584e+16				1247	LinJ.25.0020	7.32526e+15	1247	LinJ.29.1530	1.7625e+15
			1248	LbrM.16.0290	2.12953e+16	1248	LbrM.20.1580	1.23893e+16				1248	LinJ.01.0540	7.02949e+15	1248	LinJ.23.0550	1.74665e+16
			1249	LbrM.24.0420	2.07615e+16	1249	LbrM.26.0670	1.2389e+16				1249	LinJ.03.0080	7.01457e+15	1249	LinJ.24.1010	1.74584e+16
			1250	LbrM.20.5930	1.99138e+16	1250	LbrM.32.2690	1.23548e+16				1250	LinJ.16.0090	6.97026e+15	1250	LinJ.28.3240	1.71821e+16
			1251	LbrM.32.2550	1.97642e+16	1251	LbrM.08.0710	1.22547e+16				1251	LinJ.28.2450	6.9678e+15	1251	LinJ.14.0470	1.71391e+16
			1252	LbrM.26.0750	1.96141e+15	1252	LbrM.33.0960	1.2215e+16				1252	LinJ.15.0050	6.89337e+15	1252	LinJ.28.2480	1.7029e+16
			1253	LbrM.34.1740	1.95757e+15	1253	LbrM.35.6420	1.21675e+16				1253	LinJ.29.2910	6.76714e+15	1253	LinJ.34.0900	1.69498e+16
			1254	LbrM.35.2550	1.90718e+16	1254	LbrM.20.3490	1.21198e+16				1254	LinJ.27.1710	6.68195e+15	1254	LinJ.27.2500	1.68886e+16
			1255	LbrM.21.1370	1.85585e+15	1255	LbrM.15.1540	1.21036e+16				1255	LinJ.24.1610	6.46883e+15	1255	LinJ.34.1090	1.68473e+16
			1255	LbrM.12.0750	1.85585e+15	1256	LbrM.29.2850	1.20672e+16				1256	LinJ.34.2480	6.432e+15	1256	LinJ.11.0030	1.67423e+16
			1257	LbrM.20.4060	1.84522e+16	1257	LbrM.34.1060	1.19178e+16				1257	LinJ.25.1920	6.33291e+16	1257	LinJ.02.0230	1.67173e+16
			1258	LbrM.29.0650	1.82916e+16	1258	LbrM.19.1370	1.1853e+16				1258	LinJ.16.0790	6.28364e+15	1257	LinJ.22.0640	1.67173e+16
			1259	LbrM.35.1670	1.8191e+16	1259	LbrM.27.2460	1.17302e+16				1259	LinJ.35.2240	6.26406e+16	1257	LinJ.32.3310	1.67173e+16
			1260	LbrM.24.1910	1.78289e+15	1260	LbrM.28.3220	1.16447e+16				1260	LinJ.23.1070	6.22703e+15	1260	LinJ.33.0670	1.65541e+16
			1261	LbrM.30.1130	1.7827e+15	1261	LbrM.20.4670	1.15933e+16				1261	LinJ.33.0060	6.18383e+15	1261	LinJ.16.0540	1.64806e+16
			1261	LbrM.05.0310	1.7827e+15	1262	LbrM.31.0230	1.13832e+16				1262	LinJ.25.0550	6.03339e+15	1262	LinJ.12.0740	1.64674e+16
			1261	LbrM.01.0300	1.7827e+15	1263	LbrM.26.0400	1.13428e+16				1263	LinJ.36.0670	5.93341e+16	1263	LinJ.19.0320	1.63107e+16
			1264	LbrM.30.2880	1.74179e+16	1264	LbrM.28.2330	1.13417e+16				1264	LinJ.12.0007	5.91666e+15	1264	LinJ.32.3810	1.62927e+16
			1265	LbrM.20.3460	1.70549e+16	1265	LbrM.30.1970	1.1331e+16				1265	LinJ.25.2450	5.76776e+16	1265	LinJ.34.2730	1.62439e+16
			1266	LbrM.15.1450	1.69479e+16	1266	LbrM.10.0060	1.12439e+16				1266	LinJ.19.1100	5.7664e+15	1266	LinJ.29.0790	1.61123e+16
			1267	LbrM.28.1380	166351115896473	1267	LbrM.28.0840	1.10815e+16				1267	LinJ.15.1410	5.75102e+16	1267	LinJ.06.1210	1.60803e+15
			1268	LbrM.35.3050	1.65162e+16	1268	LbrM.20.2300	1.0975e+16				1268	LinJ.36.2520	5.69533e+16	1268	LinJ.26.0370	1.60371e+16
			1268	LbrM.35.0990	1.65162e+16	1269	LbrM.31.2970	1.08973e+15				1268	LinJ.36.2510	5.69533e+16	1269	LinJ.13.1590	1.59844e+15
			1268	LbrM.24.1110	1.65162e+16	1270	LbrM.25.1930	1.08171e+15				1270	LinJ.28.0260	568538962947309	1270	LinJ.20.0120	1.5973e+16
			1271	LbrM.16.1590	1.58195e+16	1271	LbrM.25.0750	1.07913e+16				1271	LinJ.36.1870	5.68392e+15	1271	LinJ.30.1160	1.58344e+16
			1272	LbrM.22.1460	1.58172e+16	1272	LbrM.09.1490	1.0771e+16				1272	LinJ.03.0050	5.58635e+15	1272	LinJ.35.3210	1.58283e+16
			1273	LbrM.33.2810	1.52236e+16	1273	LbrM.30.0130	107538073379881				1273	LinJ.32.2690	5.50429e+15	1273	LinJ.26.0730	1.57239e+16
			1274	LbrM.35.1450	1.51325e+16	1274	LbrM.25.1640	1.05983e+16				1274	LinJ.20.1680	5.47655e+15	1274	LinJ.03.0550	1.55846e+15
			1275	LbrM.21.1490	1.45411e+16	1275	LbrM.34.2610	1.05891e+16				1275	LinJ.13.1130	5.47633e+15	1275	LinJ.13.0830	1.55305e+16
			1276	LbrM.33.0390	1.44396e+16	1276	LbrM.17.0590	1.05195e+16				1276	LinJ.26.0870	5.37141e+15	1276	LinJ.23.0310	1.54985e+15
			1277	LbrM.35.4000	1.44136e+16	1277	LbrM.35.3070	1.05065e+16				1277	LinJ.23.0340	5.37078e+15	1277	LinJ.29.1950	1.5159e+15
			1278	LbrM.10.0010	1.42612e+15	1278	LbrM.33.1500	1.04983e+16				1278	LinJ.10.0650	5.30637e+15	1278	LinJ.36.0060	1.51216e+16
			1279	LbrM.03.0610	1.42016e+16	1279	LbrM.05.0400	1.04832e+16				1279	LinJ.29.2430	5.13354e+15	1279	LinJ.36.3580	1.50734e+16
			1280	LbrM.34.4100	1.38619e+16	1279	LbrM.17.0370	1.04832e+16				1280	LinJ.27.0210	5.09243e+15	1280	LinJ.33.0350	1.50567e+16
			1281	LbrM.14.0130	1.37087e+15	1279	LbrM.27.1510	1.04832e+16				1281	LinJ.35.1050	5.04839e+15	1281	LinJ.30.2740	1.49725e+16
			1282	LbrM.34.4000	1.37015e+15	1279	LbrM.27.2680	1.04832e+16				1282	LinJ.36.2230	4.94561e+15	1282	LinJ.28.0670	1.47191e+15
			1283	LbrM.28.1030	1.36639e+15	1279	LbrM.30.0680	1.04832e+16				1283	LinJ.35.1260	4.90049e+15	1283	LinJ.31.2060	147072799436925
			1284	LbrM.12.0910	1.33569e+16	1279	LbrM.30.3040	1.04832e+16				1284	LinJ.36.5410	4.88332e+16	1284	LinJ.36.2050	1.44001e+15
			1285	LbrM.33.2260	1.30808e+16	1279	LbrM.32.0330	1.04832e+16				1285	LinJ.35.1240	4.86681e+15	1285	LinJ.27.0670	1.43376e+15
			1286	LbrM.19.1750	1.30211e+15	1279	LbrM.35.1020	1.04832e+16				1286	LinJ.09.0090	4.84924e+15	1286	LinJ.25.0780	1.43292e+15
			1287	LbrM.15.0300	1.29546e+16	1279	LbrM.35.1030	1.04832e+16				1287	LinJ.03.0220	4.84177e+15	1287	LinJ.15.1530	1.42564e+16
			1288	LbrM.16.1000	1.23677e+16	1288	LbrM.03.0610	1.04759e+16				1288	LinJ.30.0360	4.84004e+16	1288	LinJ.30.0420	1.41642e+15
			1289	LbrM.25.1300	1.22106e+16	1289	LbrM.30.2460	1.04612e+16				1289	LinJ.34.3000	4.6752e+15	1289	LinJ.30.2030	1.41497e+16
			1290	LbrM.30.1450	1.20534e+16	1290	LbrM.05.0130	1.04184e+16				1290	LinJ.06.0160	4.58238e+16	1290	LinJ.08.0830	1.41305e+16
			1291	LbrM.04.1210	1.1233e+16	1291	LbrM.17.0210	1.03014e+16				1291	LinJ.03.0690	456353923862043	1291	LinJ.32.2200	1.4106e+16
			1292	LbrM.32.1380	1.10316e+16	1292	LbrM.08.0960	1.00964e+16				1292	LinJ.34.1440	4.53612e+15	1292	LinJ.36.3380	1.40718e+15
			1293	LbrM.22.1400	1.09762e+16	1293	LbrM.34.2280	1.00647e+16				1293	LinJ.36.5490	4.51397e+15	1293	LinJ.16.1380	1.39454e+15
			1294	LbrM.28.2400	1.07528e+16	1294	LbrM.34.0040	9.96697e+15				1294	LinJ.34.1840	4.48169e+15	1294	LinJ.35.2500	1.39282e+15
			1295	LbrM.24.0840	1.03944e+16	1295	LbrM.35.3450	9.94563e+15				1295	LinJ.28.1710	4.45396e+15	1295	LinJ.16.1420	1.3914e+15
			1296	LbrM.15.1000	1.03643e+16	1296	LbrM.15.1360	9.82129e+15				1296	LinJ.06.1340	4.43202e+16	1296	LinJ.14.1420	1.38606e+15
			1297	LbrM.27.1380	1.02478e+16	1297	LbrM.29.0100	9.78549e+15				1297	LinJ.27.0420	4.4208e+15	1297	LinJ.26.0420	1.3816e+16
			1298	LbrM.33.2840	1.01962e+16	1298	LbrM.30.1220	9.74179e+15				1298	LinJ.35.5220	4.3719e+15	1298	LinJ.35.3150	1.37683e+16
			1299	LbrM.21.1580	9.97857e+15	1299	LbrM.30.1070	960790135942972				1299	LinJ.01.0510	4.26565e+15	1299	LinJ.25.2450	1.36381e+16
			1300	LbrM.35.6250	9.96543e+15	1300	LbrM.07.1160	9.56823e+15				1300	LinJ.10.1090	4.19771e+15	1300	LinJ.22.0010	1.35934e+16
			1301	LbrM.35.2500	9.66142e+15	1301	LbrM.30.2030	9.44303e+15				1301	LinJ.06.0580	4.18235e+15	1301	LinJ.20.0490	1.35855e+16
			1302	LbrM.05.0090	9.64646e+15	1302	LbrM.35.7240	9.43567e+15				1302	LinJ.31.3210	4.16621e+15	1302	LinJ.10.1090	1.35703e+16
			1303	LbrM.34.0990	9.3421e+15	1303	LbrM.34.5140	9.26898e+15				1303	LinJ.10.0610	4.11404e+16	1303	LinJ.27.1940	1.35001e+15
			1304	LbrM.27.2400	8.99437e+15	1304	LbrM.30.2810	9.23558e+15				1304	LinJ.25.1230	4.10163e+16	1304	LinJ.22.1010	1.34806e+16
			1305	LbrM.24.1210	8.86382e+15	1305	LbrM.34.4010	9.17842e+15				1305	LinJ.36.0560	4.06528e+15	1305	LinJ.21.0720	1.33397e+16
			1306	LbrM.21.0530	8.43453e+15	1306	LbrM.03.0480	9.13674e+15				1306	LinJ.07.0010	4.03733e+15	1306	LinJ.25.2300	1.32992e+15
			1307	LbrM.26.0370	8.43166e+15	1307	LbrM.30.1870	8.97255e+15				1307	LinJ.26.0660	401129308453487	1307	LinJ.14.0840	1.32356e+16
			1308	LbrM.29.0020	8.04738e+15	1308	LbrM.29.2320	8.90238e+15				1308	LinJ.25.0440	3.96621e+15	1308	LinJ.36.6350	1.32195e+16
			1309	LbrM.19.0720	7.92973e+16	1309	LbrM.16.0930	887858984771393				1309	LinJ.20.0850	3.93561e+16	1309	LinJ.31.0220	1.31835e+16
			1310	LbrM.20.4140	7.92602e+15	1310	LbrM.16.0920	8.85424e+15				1310	LinJ.18.1100	3.92699e+16	1310	LinJ.35.4470	1.29917e+15
			1311	LbrM.01.0120	7.65073e+15	1311	LbrM.27.2150	8.84657e+15				1311	LinJ.32.2930	3.90893e+16	1311	LinJ.25.2160	1.28291e+16
			1312	LbrM.30.3110	7.47207e+15	1312	LbrM.01.0210	8.57427e+15				1312	LinJ.11.0210	3.89107e+16	1312	LinJ.08.0300	1.28172e+15
			1313	LbrM.34.5110	7.36022e+15	1313	LbrM.21.0100	8.47821e+15				1313	LinJ.11.0110	3.8446e+15	1313	LinJ.32.2150	1.28171e+15
			1314	LbrM.13.0240	7.23303e+15	1314	LbrM.34.4760	8.31028e+15				1314	LinJ.06.0940	3.74974e+16	1314	LinJ.35.1160	1.2385e+16
			1315	LbrM.20.4790	7.15664e+15	1315	LbrM.13.1400	8.27659e+15				1315	LinJ.22.1070	3.71312e+15	1315	LinJ.36.7020	1.23613e+16
			1316	LbrM.15.0270	6.84283e+15	1316	LbrM.22.0060	8.23138e+15				1316	LinJ.29.0670	3.6293e+15	1316	LinJ.30.2520	1.23024e+16
			1317	LbrM.35.0080	6.48419e+15	1317	LbrM.14.0820	8.20035e+15				1317	LinJ.29.1730	3.61932e+15	1316	LinJ.34.3300	1.23024e+16
			1318	LbrM.26.1630	6.44252e+15	1318	LbrM.23.1310	810641761568285				1318	LinJ.30.1120	3.61299e+15	1318	LinJ.33.2100	1.21364e+16
			1319	LbrM.18.1190	634119898866194	1319	LbrM.27.0060	8.03459e+15				1319	LinJ.09.1000	3.59805e+16	1319	LinJ.10.0040	1.20496e+15
			1320	LbrM.34.1580	6.26416e+15	1320	LbrM.31.2680	786033769617552				1320	LinJ.07.0060	3.53984e+16	1320	LinJ.08.0310	1.19822e+16
			1321	LbrM.19.0180	6.01135e+15	1321	LbrM.26.0210a	7.76455e+15				1321	LinJ.34.0780	3.49703e+16	1321	LinJ.28.0410	1.19796e+16
			1322	LbrM.33.3090	5.9869e+15	1322	LbrM.20.4460	7.76105e+15				1322	LinJ.35.5460	3.43996e+16	1322	LinJ.30.2090	1.19577e+16
			1323	LbrM.15.1530	5.71874e+15	1323	LbrM.30.0920	7.66377e+15				1323	LinJ.25.1600	3.41208e+15	1323	LinJ.25.2050	1.19523e+16
			1324	LbrM.35.5860	5.63329e+15	1324	LbrM.20.0770	7.6486e+15				1324	LinJ.01.0490	3.35891e+15	1324	LinJ.30.1010	1.19375e+16
			1325	LbrM.16.1690	5.62648e+15	1325	LbrM.15.0130	7.60176e+15				1325	LinJ.09.1140	3.3151e+16	1325	LinJ.17.0660	1.18421e+16
			1326	LbrM.32.1130	5.50668e+16	1326	LbrM.35.2160	7.57332e+15				1326	LinJ.33.2670	3.27577e+16	1326	LinJ.31.2950	1.18328e+16
			1327	LbrM.19.0520	5.49379e+15	1327	LbrM.31.1310	74778365029273				1327	LinJ.35.2010	3.26757e+15	1327	LinJ.36.1890	1.17483e+16
			1328	LbrM.30.2790	5.35644e+16	1328	LbrM.33.0320	741394149715767				1328	LinJ.36.6570	3.17161e+16	1328	LinJ.35.4860	1.16413e+16
			1329	LbrM.24.2190	5.35492e+15	1329	LbrM.32.2450	7.28869e+15				1329	LinJ.36.0590	3.02435e+16	1329	LinJ.32.1000	1.16201e+16
			1330	LbrM.13.0490	53396972921781	1330	LbrM.35.6030	7.24672e+15				1330	LinJ.35.1270	2.96581e+15	1330	LinJ.25.0080	1.14406e+16
			1331	LbrM.31.3610	5.3143e+15	1331	LbrM.03.0140	7.2418e+15				1330	LinJ.28.0390	2.96581e+15	1331	LinJ.17.0280	1.13036e+15
			1332	LbrM.28.2760	5.26394e+16	1332	LbrM.30.3170	7.22199e+15				1332	LinJ.18.0940	2.9632e+16	1332	LinJ.34.3690	1.1303e+16
			1333	LbrM.34.1320	5.26359e+15	1333	LbrM.24.1510	7.20804e+15				1333	LinJ.27.1560	2.95479e+16	1333	LinJ.15.1610	1.12159e+16
			1334	LbrM.35.5140	5.16565e+15	1334	LbrM.05.0430	7.1412e+15				1334	LinJ.32.3990	2.91008e+16	1334	LinJ.35.1950	1.11122e+16
			1335	LbrM.20.0040	5.12486e+15	1335	LbrM.31.2980	7.00042e+15				1335	LinJ.30.3650	2.89899e+16	1335	LinJ.26.2560	1.11097e+16
			1336	LbrM.31.3520	4.88602e+16	1336	LbrM.29.0450	6.96018e+15				1336	LinJ.05.0750	2.83592e+15	1336	LinJ.18.1380	109614413442184
			1337	LbrM.35.6200	4.86507e+15	1337	LbrM.22.1180	6.95751e+15				1337	LinJ.01.0520	2.79872e+15	1337	LinJ.14.0760	1.09338e+16
			1338	LbrM.32.1010	4.84844e+15	1338	LbrM.14.0470	6.82067e+15				1338	LinJ.19.1520	2.79112e+16	1338	LinJ.11.0770	1.08567e+16
			1339	LbrM.32.3140	4.84239e+15	1339	LbrM.35.5440	68084803220832				1339	LinJ.35.5330	2.79082e+16	1339	LinJ.34.4360	1.08216e+16
			1340	LbrM.34.4870	4.78901e+15	1340	LbrM.25.1400	6.66655e+15				1340	LinJ.23.0150	2.72321e+15	1340	LinJ.29.0030	1.0809e+16
			1341	LbrM.23.1450	4.78703e+15	1341	LbrM.04.0370	6.62881e+15				1341	LinJ.29.0020	2.67378e+16	1341	LinJ.17.1550	1.07948e+16
			1342	LbrM.31.2970	4.72509e+15	1342	LbrM.14.0720	6.58261e+15				1342	LinJ.32.2470	2.66414e+16	1342	LinJ.13.0300	1.07907e+16
			1342	LbrM.20.0730	4.72509e+15	1343	LbrM.09.0230	6.57228e+15				1343	LinJ.36.7340	2.65715e+16	1343	LinJ.31.2000	1.07032e+15
			1342	LbrM.20.0720	4.72509e+15	1344	LbrM.20.1620	6.43368e+15				1344	LinJ.23.1660	2.6253e+16	1344	LinJ.31.2350	1.06895e+16
			1345	LbrM.31.2120	4.68761e+16	1345	LbrM.03.0100	6.40641e+15				1345	LinJ.33.0360	2.59924e+16	1345	LinJ.22.0330	1.06682e+16
			1346	LbrM.05.0270	4.64189e+15	1346	LbrM.20.3610	6.40057e+15				1346	LinJ.20.0980	2.57597e+16	1346	LinJ.26.2600	1.05652e+16
			1347	LbrM.35.5190	4.63651e+15	1347	LbrM.14.1350	6.39751e+15				1347	LinJ.36.6850	2.54256e+15	1347	LinJ.36.6330	1.04198e+16
			1348	LbrM.33.2610	4.58953e+15	1348	LbrM.16.0090	6.33979e+15				1348	LinJ.09.0410	2.50923e+16	1348	LinJ.21.1870	1.03898e+16
			1349	LbrM.11.0710	4.50988e+16	1349	LbrM.13.0880	6.29416e+15				1349	LinJ.30.3560	2.49735e+16	1349	LinJ.23.0060	1.03743e+16
			1350	LbrM.23.0970	4.42605e+15	1350	LbrM.27.2700	6.19477e+16				1350	LinJ.36.1590	2.49609e+16	1350	LinJ.36.3840	1.03629e+16
			1351	LbrM.29.2570	4.39471e+15	1351	LbrM.10.0740	6.15939e+15				1351	LinJ.29.0010	2.49399e+16	1351	LinJ.36.5830	1.03484e+16
			1352	LbrM.35.0590	4.15155e+15	1352	LbrM.26.1890	6.11081e+16				1352	LinJ.13.0600	2.42697e+15	1352	LinJ.05.0390	1.02747e+16
			1353	LbrM.10.1370	4.06895e+15	1353	LbrM.19.1440	6.07393e+15				1353	LinJ.28.0720	2.3905e+15	1352	LinJ.17.0440	1.02747e+16
			1354	LbrM.25.1460	4.04686e+15	1354	LbrM.25.0580	6.06933e+15				1354	LinJ.08.1220	2.38377e+15	1352	LinJ.30.3090	1.02747e+16
			1355	LbrM.26.0500	3.95969e+16	1355	LbrM.28.2480	6.04148e+15				1355	LinJ.02.0010	2.32462e+15	1352	LinJ.32.0270	1.02747e+16
			1356	LbrM.23.0080	3.71817e+15	1356	LbrM.24.0650	6.00773e+15				1356	LinJ.24.1590	2.30734e+16	1352	LinJ.36.0960	1.02747e+16
			1357	LbrM.08.0960	3.71429e+16	1357	LbrM.13.0150	5.97705e+16				1357	LinJ.22.1370	2.30618e+16	1352	LinJ.36.0970	1.02747e+16
			1358	LbrM.34.4150	3.68513e+16	1358	LbrM.34.1650	5.95943e+15				1358	LinJ.30.1070	2.25065e+16	1358	LinJ.29.1100	1.00754e+16
			1359	LbrM.22.0720	3.56478e+16	1359	LbrM.33.0060	5.95879e+15				1358	LinJ.27.0670	2.25065e+16	1359	LinJ.34.2580	1.00326e+16
			1360	LbrM.08.0540	3.46177e+16	1360	LbrM.11.1060	592914885829065				1358	LinJ.01.0270	2.25065e+16	1360	LinJ.33.1710	996462407879192
			1361	LbrM.31.1330	3.45721e+15	1361	LbrM.35.2600	5.9183e+16				1361	LinJ.31.0770	2.20129e+15	1361	LinJ.28.2040	9.89616e+15
			1362	LbrM.14.0420	3.4119e+16	1362	LbrM.30.2490	5.81074e+15				1362	LinJ.27.2140	2.18702e+16	1362	LinJ.20.0270	9.88989e+15
			1363	LbrM.25.1040	334863133961244	1362	LbrM.20.3100	5.81074e+15				1363	LinJ.20.0020	2.17018e+16	1363	LinJ.30.1910	9.88986e+15
			1364	LbrM.30.0610	3.32594e+15	1364	LbrM.01.0550	5.81065e+15				1364	LinJ.26.0710	2.13912e+15	1364	LinJ.23.1080	9.76043e+15
			1365	LbrM.14.1670	3.30031e+15	1365	LbrM.18.0390	5.76859e+15				1365	LinJ.17.0770	2.13467e+15	1365	LinJ.07.1260	973146431781123
			1366	LbrM.33.1860	3.23325e+15	1366	LbrM.16.0800	5.72667e+15				1366	LinJ.21.1410	2.13121e+16	1366	LinJ.31.2580	9.57217e+15
			1367	LbrM.31.2830	3.18682e+15	1367	LbrM.35.1980	5.65329e+15				1366	LinJ.12.0671	2.13121e+16	1367	LinJ.16.1390	9.34457e+15
			1367	LbrM.31.2820	3.18682e+15	1368	LbrM.25.0600	5.62394e+15				1368	LinJ.35.1820	2.05775e+16	1368	LinJ.31.2710	9.29259e+15
			1367	LbrM.26.1070	3.18682e+15	1369	LbrM.06.0140	5.54789e+16				1369	LinJ.19.1190	2.05074e+16	1369	LinJ.28.2950	921895000824793
			1370	LbrM.35.6330	3.0881e+15	1370	LbrM.29.0260	5.3047e+15				1370	LinJ.16.0300	1.99958e+16	1370	LinJ.09.0950	9.20604e+15
			1371	LbrM.21.1990	3.03863e+15	1371	LbrM.25.0020	5.29669e+15				1371	LinJ.25.2580	1.92742e+16	1371	LinJ.35.2380	9.2005e+15
			1372	LbrM.32.3900	2.88442e+16	1372	LbrM.35.5630	5.27957e+16				1372	LinJ.18.0360	184400752605978	1372	LinJ.15.0130	9.08963e+15
			1373	LbrM.06.0890	2.87722e+16	1373	LbrM.20.2210	5.19498e+15				1373	LinJ.35.4170	184381987255494	1373	LinJ.36.0560	9.07029e+15
			1374	LbrM.08.0080	2.87661e+15	1374	LbrM.16.0890	5.01981e+15				1374	LinJ.34.4230	1.83776e+16	1374	LinJ.32.2380	8.98209e+15
			1375	LbrM.03.0350	2.82489e+16	1375	LbrM.30.0400	4.97795e+16				1375	LinJ.14.0750	1.81534e+16	1375	LinJ.29.2460	8.9784e+15
			1376	LbrM.29.2430	2.79651e+15	1376	LbrM.32.0800	49225037526794				1376	LinJ.17.1470	1.80563e+16	1376	LinJ.27.2570	8.88712e+15
			1377	LbrM.29.1180	2.70266e+16	1377	LbrM.32.2980	4.88223e+15				1377	LinJ.34.3660	1.80372e+16	1377	LinJ.01.0790	8.84744e+15
			1378	LbrM.35.0380	2.6853e+16	1378	LbrM.35.0730	4.84329e+15				1378	LinJ.24.1220	1.76812e+16	1378	LinJ.26.2730	8.82866e+15
			1379	LbrM.04.0800	2.68213e+15	1379	LbrM.25.0590	4.82068e+16				1379	LinJ.36.1390	1.72767e+16	1379	LinJ.16.0240	8.82831e+15
			1380	LbrM.20.2230	2.67227e+16	1380	LbrM.30.2740	4.78076e+15				1380	LinJ.16.1630	1.69059e+15	1380	LinJ.31.1110	8.76212e+15
			1381	LbrM.35.2190	2.63327e+16	1381	LbrM.20.1950	476042271484927				1381	LinJ.15.1510	1.66503e+15	1381	LinJ.31.2470	8.71762e+15
			1382	LbrM.33.1800	2.61446e+15	1382	LbrM.20.5870	4.74654e+15				1382	LinJ.36.2970	1.65093e+16	1382	LinJ.25.0900	8.67264e+15
			1383	LbrM.04.1230	2.51368e+16	1383	LbrM.10.0850	4.70216e+15				1382	LinJ.36.0930	1.65093e+16	1383	LinJ.30.2990	861976984979148
			1384	LbrM.20.3050	2.47736e+15	1384	LbrM.34.3870	4.58537e+15				1382	LinJ.24.1120	1.65093e+16	1384	LinJ.28.0860	8.53145e+15
			1385	LbrM.20.0220	2.33609e+16	1385	LbrM.07.1220	455179205349708				1385	LinJ.33.0410	1.60949e+15	1385	LinJ.35.5060	8.47418e+15
			1386	LbrM.04.0440	2.30991e+15	1386	LbrM.06.0390	4.53782e+16				1386	LinJ.13.0090	1.55908e+15	1386	LinJ.22.0007	8.45779e+15
			1387	LbrM.28.0510	2.20989e+15	1387	LbrM.26.1230	4.52575e+15				1387	LinJ.14.0130	1.54587e+16	1387	LinJ.21.0100	844730702432865
			1388	LbrM.17.1490	2.17433e+15	1388	LbrM.24.1330	4.41616e+16				1388	LinJ.08.0080	1.48783e+15	1388	LinJ.30.1710	8.37362e+15
			1389	LbrM.18.1200	2.147e+16	1389	LbrM.23.0990	4.40717e+15				1389	LinJ.15.0200	1.46456e+16	1389	LinJ.32.1930	8.36753e+15
			1390	LbrM.07.0130	2.14389e+15	1390	LbrM.26.1070	4.33983e+15				1390	LinJ.35.0990	1.45711e+15	1390	LinJ.34.0890	8.19868e+15
			1391	LbrM.30.0800	2.13112e+16	1391	LbrM.28.2090	4.31402e+15				1391	LinJ.10.1460	1.44817e+16	1391	LinJ.33.2750	8.15323e+15
			1392	LbrM.29.0600	2.12894e+16	1392	LbrM.23.0370	4.27488e+15				1392	LinJ.21.1530	1.44589e+15	1392	LinJ.30.1920	7.93376e+15
			1393	LbrM.26.2630	2.10739e+15	1393	LbrM.21.1500	4.26264e+15				1393	LinJ.35.4070	1.38414e+16	1393	LinJ.27.0050	7.91473e+15
			1394	LbrM.26.1550	2.02622e+15	1394	LbrM.09.0090	4.24279e+16				1394	LinJ.12.0810	1.35078e+16	1394	LinJ.36.2450	790910867260976
			1395	LbrM.31.0530	2.0	1395	LbrM.35.2340	4.21487e+16				1395	LinJ.33.2700	1.27861e+16	1395	LinJ.24.1410	7.87613e+15
			1395	LbrM.24.2090	2.0	1396	LbrM.25.2210	4.20598e+15				1396	LinJ.28.2350	1.2781e+16	1396	LinJ.36.6490	7.87455e+15
			1395	LbrM.20.5280	2.0	1397	LbrM.03.0070	4.14544e+16				1397	LinJ.17.0930	1.24287e+16	1397	LinJ.29.0330	7.83261e+15
			1395	LbrM.29.1540	2.0	1398	LbrM.09.1000	4.11341e+16				1398	LinJ.31.3070	1.21275e+16	1398	LinJ.22.0600	7.79963e+15
			1395	LbrM.28.1930	2.0	1399	LbrM.05.0360	4.11208e+15				1399	LinJ.30.1390	1.19598e+16	1399	LinJ.19.0970	7.77564e+15
			1395	LbrM.20.3170	2.0	1400	LbrM.06.0270	4.10414e+15				1400	LinJ.16.1000	1.19133e+16	1400	LinJ.14.1260	7.73604e+15
			1395	LbrM.17.0840	2.0	1401	LbrM.03.0240	4.06763e+15				1401	LinJ.15.0310	1.15097e+16	1401	LinJ.36.3180	769597079919121
			1402	LbrM.03.0140	1.93615e+16	1402	LbrM.27.1950	4.04238e+16				1402	LinJ.04.1210	1.14928e+16	1402	LinJ.36.1170	7.66851e+15
			1403	LbrM.24.1170	1.87621e+16	1403	LbrM.25.1170	4.01041e+16				1403	LinJ.05.0090	1.14559e+16	1403	LinJ.13.0960	7.57808e+15
			1404	LbrM.35.0560	1.86071e+16	1404	LbrM.30.1180	3.98797e+16				1404	LinJ.22.1350	1.14166e+15	1404	LinJ.36.6000	7.52487e+15
			1405	LbrM.35.5310	1.65263e+15	1405	LbrM.26.0910	3.95476e+16				1405	LinJ.36.0040	1.1403e+16	1405	LinJ.34.1840	7.40751e+15
			1406	LbrM.29.2840	1.64187e+16	1406	LbrM.07.0010	3.92598e+15				1406	LinJ.35.1020	1.13552e+15	1406	LinJ.14.0800	7.27535e+15
			1407	LbrM.20.0130	1.57911e+16	1407	LbrM.13.1000	3.91163e+16				1407	LinJ.15.1600	1.08484e+16	1407	LinJ.09.0380	7.22159e+15
			1408	LbrM.33.2680	1.55795e+16	1408	LbrM.35.0650	3.8621e+16				1408	LinJ.21.1590	1.08121e+16	1408	LinJ.35.2270	7.17644e+15
			1409	LbrM.25.2060	1.53918e+16	1409	LbrM.33.2890	384444366548298				1409	LinJ.36.6170	1.07225e+16	1409	LinJ.35.1730	7.12085e+15
			1410	LbrM.15.0210	147280145261012	1410	LbrM.21.1130	3.80574e+16				1410	LinJ.32.1290	1.06717e+16	1410	LinJ.25.0260	7.1007e+15
			1411	LbrM.34.1700	1.4495e+15	1411	LbrM.29.1230	3.79627e+15				1411	LinJ.30.2920	1.02805e+16	1411	LinJ.33.0340	7.0083e+15
			1412	LbrM.27.2550	1.44025e+16	1412	LbrM.09.1170	3.71287e+15				1412	LinJ.35.1410	1.02099e+16	1412	LinJ.23.0220	6.96813e+15
			1413	LbrM.33.0140	1.41843e+16	1413	LbrM.27.0500	37122926236052				1413	LinJ.15.1020	9.70128e+15	1413	LinJ.08.1110	6.94293e+15
			1414	LbrM.31.3330	1.36667e+16	1414	LbrM.29.0020	3.70405e+15				1414	LinJ.15.0280	9.38076e+15	1414	LinJ.21.1120	692269755192483
			1415	LbrM.10.1280	1.33333e+16	1415	LbrM.32.3200	3.68743e+15				1415	LinJ.30.3160	8.89769e+15	1415	LinJ.13.1080	6.85315e+15
			1416	LbrM.35.7380	1.31558e+16	1416	LbrM.20.2450	3.66974e+15				1416	LinJ.27.1160	8.89419e+15	1416	LinJ.34.1880	6.84399e+15
			1417	LbrM.26.1920	1.27697e+16	1417	LbrM.25.1700	36321476842482				1417	LinJ.36.2390	878341302581146	1417	LinJ.32.0870	684030122188035
			1418	LbrM.21.0500	1.25046e+16	1418	LbrM.22.1130	3.62834e+16				1418	LinJ.26.0340	876641839567363	1418	LinJ.35.0240	6.80376e+15
			1419	LbrM.07.0810	1.20396e+15	1419	LbrM.34.2940	3.61004e+16				1419	LinJ.35.4970	8.35065e+15	1419	LinJ.34.2480	6.63723e+15
			1420	LbrM.28.1060	1.18202e+16	1420	LbrM.01.0540	3.58707e+15				1420	LinJ.21.0530	8.26661e+15	1420	LinJ.04.1220	6.6367e+15
			1421	LbrM.14.0880	1.17727e+15	1421	LbrM.35.3500	3.56194e+15				1421	LinJ.14.0180	8.1998e+15	1421	LinJ.03.0050	6.61498e+15
			1422	LbrM.11.0410	1.15662e+16	1421	LbrM.35.4660	3.56194e+15				1422	LinJ.04.0380	7.34817e+15	1422	LinJ.09.1180	6.56213e+15
			1423	LbrM.16.0860	1.15486e+16	1423	LbrM.35.5510	351941009656815				1423	LinJ.32.0750	7.25855e+15	1423	LinJ.31.2700	6.56164e+15
			1424	LbrM.06.0270	1.11447e+15	1424	LbrM.25.0380	35168945454662				1424	LinJ.35.5130	716562585600555	1424	LinJ.35.4080	6.55769e+15
			1425	LbrM.30.2450	1.09884e+16	1425	LbrM.26.0820	3.51562e+15				1425	LinJ.14.0970	7.14325e+15	1425	LinJ.32.2770	6.40897e+15
			1426	LbrM.06.0320	1.01274e+16	1426	LbrM.23.0220	342199987756859				1426	LinJ.11.0140	7.13092e+15	1426	LinJ.16.0090	6.36158e+15
			1427	LbrM.28.1570	1.0	1427	LbrM.35.6390	3.31157e+15				1427	LinJ.19.0400	7.0395e+15	1427	LinJ.16.1630	6.36046e+15
			1428	LbrM.06.1230	9.55828e+15	1428	LbrM.32.3030	3.29622e+16				1428	LinJ.33.2910	6.79593e+15	1428	LinJ.16.0790	6.35146e+16
			1429	LbrM.33.3070	9.51486e+15	1429	LbrM.26.0700	3.28458e+16				1428	LinJ.32.0730	6.79593e+15	1429	LinJ.33.0060	6.34922e+16
			1430	LbrM.27.2180	9.50602e+15	1430	LbrM.20.5020	3.25207e+16				1428	LinJ.22.0480	6.79593e+15	1430	LinJ.23.1220	6.3415e+15
			1431	LbrM.26.0330	8.46684e+15	1431	LbrM.20.1360	3.24868e+15				1428	LinJ.13.1320	6.79593e+15	1431	LinJ.34.2220	6.31928e+16
			1432	LbrM.17.0570	8.36556e+15	1432	LbrM.26.0410	3.23955e+15				1428	LinJ.04.0680	6.79593e+15	1432	LinJ.03.0080	6.28821e+15
			1433	LbrM.34.0400	8.20521e+15	1433	LbrM.07.0050	3.16486e+16				1433	LinJ.20.0620	6.78201e+15	1433	LinJ.06.0580	6.15908e+15
			1434	LbrM.33.2100	7.72814e+15	1434	LbrM.29.1710	3.14488e+15				1434	LinJ.01.0090	6.74222e+15	1434	LinJ.20.0280	61434845412027
			1435	LbrM.05.0720	7.68987e+15	1435	LbrM.09.1140	3.07274e+16				1435	LinJ.24.0840	6.74177e+15	1435	LinJ.01.0540	6.12529e+15
			1436	LbrM.21.1390	7.65776e+15	1436	LbrM.31.2120	3.04785e+15				1436	LinJ.32.1090	6.38966e+15	1436	LinJ.34.2320	5.97305e+15
			1437	LbrM.35.4460	7.4057e+15	1437	LbrM.34.1930	2.99007e+15				1437	LinJ.26.1590	6.00329e+15	1437	LinJ.20.1680	5.92894e+15
			1438	LbrM.35.2630	7.36041e+15	1438	LbrM.18.0310	2.98464e+16				1438	LinJ.32.3040	5.8047e+15	1438	LinJ.33.2010	5.78036e+16
			1439	LbrM.32.2460	7.00284e+15	1439	LbrM.14.0060	2.96937e+15				1439	LinJ.34.0050	5.78246e+15	1439	LinJ.14.0190	5.7378e+16
			1440	LbrM.23.1700	6.79432e+15	1440	LbrM.01.0520	2.93767e+16				1440	LinJ.02.0110	5.64074e+16	1440	LinJ.19.1100	5.73091e+15
			1441	LbrM.29.0100	672743449056658	1441	LbrM.20.0670	289724000662284				1441	LinJ.16.1730	559201916018061	1441	LinJ.35.2760	5.67595e+16
			1442	LbrM.34.4710	6.20114e+15	1442	LbrM.32.2780	2.88873e+15				1442	LinJ.29.2710	5.56415e+15	1442	LinJ.35.2240	5.62608e+15
			1442	LbrM.28.2420	6.20114e+15	1443	LbrM.29.0030	2.8787e+16				1443	LinJ.34.0140	5.45616e+15	1443	LinJ.23.1070	550643446925446
			1444	LbrM.18.0220	6.16446e+15	1444	LbrM.34.2820	2.85968e+15				1444	LinJ.35.1670	528298133191315	1444	LinJ.35.1240	5.50561e+15
			1445	LbrM.29.0880	604585109907402	1445	LbrM.20.0860	2.85193e+16				1444	LinJ.11.0970	528298133191315	1445	LinJ.28.2450	540210277768194
			1446	LbrM.29.2740	5.77574e+15	1446	LbrM.05.0730	2.84164e+16				1446	LinJ.26.0470	5.2532e+15	1446	LinJ.25.0020	5.3901e+16
			1446	LbrM.15.1480	5.77574e+15	1447	LbrM.34.1020	2.81342e+15				1447	LinJ.24.2200	5.20461e+15	1447	LinJ.32.3230	538856370821561
			1448	LbrM.28.2230	5.72889e+15	1448	LbrM.10.0010	2.61982e+16				1448	LinJ.36.5120	5.20403e+15	1448	LinJ.28.0260	5.36805e+16
			1449	LbrM.29.1440	5.45455e+15	1449	LbrM.09.1510	2.61334e+16				1449	LinJ.30.2830	5.18057e+15	1449	LinJ.17.1260	532303690787836
			1449	LbrM.29.0900	5.45455e+15	1450	LbrM.18.1020	2.61001e+15				1450	LinJ.28.2080	5.09698e+15	1450	LinJ.13.1130	5.30179e+16
			1449	LbrM.25.0450	5.45455e+15	1451	LbrM.35.5030	2.60667e+16				1451	LinJ.09.1030	5.06238e+16	1451	LinJ.20.0980	5.25031e+15
			1449	LbrM.24.2450	5.45455e+15	1452	LbrM.13.0530	2.4739e+16				1452	LinJ.35.4590	5.05999e+15	1452	LinJ.36.1870	5.24478e+15
			1449	LbrM.09.0080	5.45455e+15	1453	LbrM.13.0390	2.46713e+15				1453	LinJ.29.2570	5.01266e+16	1453	LinJ.10.0650	5.20611e+15
			1454	LbrM.34.3780	5.41206e+15	1454	LbrM.31.2190	2.44359e+15				1454	LinJ.31.3300	5.00837e+15	1454	LinJ.36.2230	5.19242e+15
			1455	LbrM.29.2460	53125	1455	LbrM.35.2380	2.44294e+16				1455	LinJ.06.0290	496225047618656	1455	LinJ.25.1920	5.12607e+15
			1456	LbrM.28.0530	4.99815e+16	1456	LbrM.35.5430	2.43069e+16				1456	LinJ.08.0520	495600356100742	1456	LinJ.36.2510	5.1032e+15
			1457	LbrM.34.1570	4.46374e+16	1457	LbrM.20.5930	2.4121e+16				1457	LinJ.36.5170	4.83595e+15	1456	LinJ.36.2520	5.1032e+15
			1458	LbrM.32.2360	4.19668e+15	1458	LbrM.28.0700	2.39913e+16				1458	LinJ.32.0970	4.82746e+15	1458	LinJ.05.0360	5.0976e+16
			1459	LbrM.35.3540	4.11892e+15	1459	LbrM.13.0960	2.39053e+15				1459	LinJ.33.2450	4.82635e+15	1459	LinJ.36.0670	509428730562756
			1460	LbrM.31.2160	3.76295e+15	1460	LbrM.17.0690	2.38959e+15				1460	LinJ.10.1360	4.72624e+15	1460	LinJ.35.3080	5.03298e+16
			1461	LbrM.35.6390	3.26404e+16	1461	LbrM.20.5150	2.37888e+16				1461	LinJ.05.0280	4.72333e+15	1461	LinJ.15.0200	4.99797e+15
			1462	LbrM.02.0140	3.22669e+15	1462	LbrM.34.1170	2.33473e+16				1462	LinJ.13.0560	4.68859e+15	1462	LinJ.30.2720	4.98593e+15
			1463	LbrM.32.0390	2.96658e+15	1463	LbrM.23.1980	2.30086e+15				1463	LinJ.36.6160	4.63882e+15	1463	LinJ.28.0870	4.8922e+15
			1464	LbrM.19.1670	2.65762e+15	1464	LbrM.34.5190	2.2981e+15				1464	LinJ.31.2060	4.59096e+15	1464	LinJ.09.0090	4.82199e+16
			1465	LbrM.20.5060	2.46943e+15	1465	LbrM.26.0270	2.27696e+15				1465	LinJ.32.3100	4.56297e+15	1465	LinJ.27.0210	479435827927905
			1466	LbrM.23.0980	2.4341e+16	1466	LbrM.18.1070	2.27274e+16				1466	LinJ.08.0300	4.48631e+15	1466	LinJ.15.1410	469463331250995
			1467	LbrM.14.0950	1.60486e+15	1467	LbrM.28.0410	2.25448e+16				1467	LinJ.28.1260	4.42342e+15	1467	LinJ.11.0110	4.64812e+16
			1468	LbrM.34.1090	1.5248e+16	1467	LbrM.34.1180	2.25448e+16				1468	LinJ.05.0060	4.37965e+15	1468	LinJ.35.5160	4.58633e+15
			1469	LbrM.31.2190	1.31466e+15	1469	LbrM.16.0290	2.2386e+15				1469	LinJ.31.2090	4.37738e+16	1469	LinJ.30.0360	448957070277806
			1470	LbrM.34.4680	6.89655e+15	1470	LbrM.21.0040	2.22219e+16				1470	LinJ.23.1050	434504306036548	1470	LinJ.17.0100	4.44472e+16
			1471	LbrM.34.3830	1.65289e+15	1470	LbrM.30.2120	2.22219e+16				1471	LinJ.36.0530	4.18824e+15	1470	LinJ.17.0170	4.44472e+16
			1471	LbrM.16.0170	1.65289e+15	1472	LbrM.27.0570	2.19769e+16				1472	LinJ.33.1690	4.12148e+15	1470	LinJ.17.0190	4.44472e+16
			1473	LbrM.35.2240	0.0	1473	LbrM.20.2950	2.13291e+15				1473	LinJ.11.0910	401379792934691	1473	LinJ.20.0850	4.44127e+15
			1473	LbrM.35.1460	0.0	1474	LbrM.20.4100	2.12754e+16				1474	LinJ.23.0080	3.9407e+15	1474	LinJ.26.0870	441844197981521
			1473	LbrM.35.7240	0.0	1475	LbrM.27.1790	2.07975e+16				1475	LinJ.14.0420	3.90232e+15	1475	LinJ.27.0300	4.40407e+15
			1473	LbrM.35.0420	0.0	1476	LbrM.10.1410	2.066e+16				1476	LinJ.35.4220	3.88385e+15	1476	LinJ.34.3000	4.38436e+15
			1473	LbrM.34.4950	0.0	1477	LbrM.34.4000	2.03477e+16				1477	LinJ.23.1590	3.81536e+16	1477	LinJ.36.5490	4.3739e+15
			1473	LbrM.35.6430	0.0	1478	LbrM.17.1030	2.00992e+16				1478	LinJ.25.1380	3.80391e+16	1478	LinJ.14.1510	4.33577e+15
			1473	LbrM.34.2750	0.0	1479	LbrM.13.0770	1.99954e+16				1479	LinJ.25.1980	3.80345e+16	1479	LinJ.36.7340	42399680918709
			1473	LbrM.34.1770	0.0	1480	LbrM.31.0930	1.99805e+15				1480	LinJ.08.1100	3.71429e+16	1480	LinJ.32.2690	4.23645e+15
			1473	LbrM.34.0060	0.0	1481	LbrM.34.1740	1.98202e+15				1481	LinJ.35.1950	3.60172e+16	1481	LinJ.25.0550	4.18778e+15
			1473	LbrM.34.0970	0.0	1482	LbrM.24.1910	1.9782e+16				1482	LinJ.34.0850	3.59094e+15	1482	LinJ.06.0160	4.182e+16
			1473	LbrM.34.1480	0.0	1483	LbrM.32.2550	1.96991e+15				1482	LinJ.34.0840	3.59094e+15	1483	LinJ.36.6280	4.15452e+15
			1473	LbrM.32.3200	0.0	1484	LbrM.35.1670	1.90884e+16				1482	LinJ.34.0830	3.59094e+15	1484	LinJ.03.0220	4.1414e+16
			1473	LbrM.32.2420	0.0	1485	LbrM.13.1350	1.87441e+15				1482	LinJ.34.0820	3.59094e+15	1485	LinJ.17.0090	4.139e+15
			1473	LbrM.32.0790	0.0	1486	LbrM.25.2550	1.85937e+15				1482	LinJ.31.2700	3.59094e+15	1486	LinJ.27.2200	4.11051e+15
			1473	LbrM.31.0700	0.0	1487	LbrM.10.0690	1.78305e+16				1487	LinJ.30.0550	350914925431296	1487	LinJ.06.1340	4.05763e+15
			1473	LbrM.32.2670	0.0	1488	LbrM.30.1090	1.77322e+16				1488	LinJ.22.0600	3.47607e+15	1488	LinJ.36.6960	4.05182e+16
			1473	LbrM.31.0190	0.0	1489	LbrM.24.0420	1.72646e+16				1489	LinJ.14.1580	3.26777e+15	1489	LinJ.19.0820	4.04347e+15
			1473	LbrM.30.3160	0.0	1490	LbrM.20.0660	1.71233e+16				1490	LinJ.27.2290	3.18835e+15	1490	LinJ.14.0130	4.03824e+16
			1473	LbrM.35.3690	0.0	1491	LbrM.32.0850	1.70637e+16				1491	LinJ.15.0780	31214830833728	1491	LinJ.35.5460	4.02594e+16
			1473	LbrM.34.4180	0.0	1492	LbrM.15.1450	1.70635e+16				1492	LinJ.32.3810	3.09898e+15	1492	LinJ.31.3210	3.99418e+16
			1473	LbrM.30.0270	0.0	1493	LbrM.20.5520	169112458767022				1493	LinJ.34.2500	2.81221e+15	1493	LinJ.11.0210	3.96793e+16
			1473	LbrM.33.2670	0.0	1494	LbrM.29.0650	1.65998e+15				1494	LinJ.34.0230	2.74152e+16	1494	LinJ.29.2430	3.93272e+15
			1473	LbrM.29.0270	0.0	1495	LbrM.25.1010	1.65502e+15				1495	LinJ.33.0860	2.52966e+16	1495	LinJ.34.1440	3.89694e+15
			1473	LbrM.34.2970	0.0	1496	LbrM.28.1750	1.61048e+16				1495	LinJ.21.2240	2.52966e+16	1496	LinJ.35.1050	3.86564e+15
			1473	LbrM.28.3250	0.0	1497	LbrM.22.1460	1.60125e+15				1495	LinJ.08.1290	2.52966e+16	1497	LinJ.20.1270	3.85439e+15
			1473	LbrM.29.0330	0.0	1498	LbrM.09.0180	1.5931e+16				1498	LinJ.32.3820	2.4567e+16	1498	LinJ.27.0420	3.8405e+15
			1473	LbrM.35.6060	0.0	1499	LbrM.30.1130	1.57493e+16				1499	LinJ.36.0320	2.43229e+15	1499	LinJ.25.1230	3.81242e+16
			1473	LbrM.35.0170	0.0	1500	LbrM.18.0380	1.57427e+16				1500	LinJ.18.0160	2.40658e+16	1500	LinJ.28.1710	3.77385e+15
			1473	LbrM.34.4940	0.0	1501	LbrM.27.0630	1.57077e+16				1501	LinJ.36.6280	2.37945e+15	1501	LinJ.35.2010	3.70597e+15
			1473	LbrM.28.1490	0.0	1502	LbrM.20.3460	1.52315e+16				1502	LinJ.31.2580	2.36594e+15	1502	LinJ.35.3060	3.6816e+16
			1473	LbrM.28.1010	0.0	1503	LbrM.35.6910	1.51932e+16				1503	LinJ.34.3250	2.36103e+16	1503	LinJ.01.0510	3.67894e+16
			1473	LbrM.31.0350	0.0	1504	LbrM.35.0990	1.51223e+15				1504	LinJ.04.0840	2.33488e+16	1504	LinJ.28.1050	3.67109e+16
			1473	LbrM.28.0350	0.0	1504	LbrM.35.3050	1.51223e+15				1505	LinJ.36.2080	2.22277e+16	1505	LinJ.26.0660	3.66092e+16
			1473	LbrM.28.0280	0.0	1504	LbrM.24.1110	1.51223e+15				1506	LinJ.24.1180	2.21001e+16	1506	LinJ.35.4070	3.63732e+15
			1473	LbrM.34.0080	0.0	1507	LbrM.20.0900	1.46731e+16				1507	LinJ.36.0500	2.20634e+15	1507	LinJ.35.1260	3.62919e+16
			1473	LbrM.28.0150	0.0	1508	LbrM.35.1450	1.46029e+16				1508	LinJ.03.0120	216014383122399	1508	LinJ.36.2270	3.60414e+15
			1473	LbrM.33.3110	0.0	1509	LbrM.20.4060	1.3695e+16				1509	LinJ.36.4220	2.15095e+16	1509	LinJ.07.0010	3.59491e+16
			1473	LbrM.34.3920	0.0	1510	LbrM.30.2880	1.35594e+15				1510	LinJ.12.0370	212339387138158	1510	LinJ.26.1680	3.58621e+15
			1473	LbrM.33.3330	0.0	1511	LbrM.12.0910	1.34693e+16				1511	LinJ.33.0280	2.0	1511	LinJ.28.2860	3.57478e+15
			1473	LbrM.26.2660	0.0	1512	LbrM.26.0750	1.32692e+16				1512	LinJ.09.1540	1.94636e+15	1512	LinJ.22.1070	3.57278e+15
			1473	LbrM.30.0020	0.0	1513	LbrM.33.0390	1.3266e+16				1513	LinJ.35.4810	1.92687e+15	1513	LinJ.32.2930	3.5454e+15
			1473	LbrM.35.4260	0.0	1514	LbrM.28.1030	1.3206e+16				1514	LinJ.30.1440	1.87551e+15	1514	LinJ.29.1730	3.4487e+16
			1473	LbrM.35.3200	0.0	1515	LbrM.22.0720	130675574378462				1514	LinJ.20.1720	1.87551e+15	1515	LinJ.10.0780	3.40494e+15
			1473	LbrM.28.1640	0.0	1516	LbrM.30.1450	1.30441e+16				1516	LinJ.07.0820	1.81687e+16	1516	LinJ.29.1240	3.39208e+16
			1473	LbrM.26.2180	0.0	1517	LbrM.21.0530	1.2808e+16				1517	LinJ.29.0610	1.77151e+16	1517	LinJ.09.1000	3.37077e+16
			1473	LbrM.34.5310	0.0	1518	LbrM.25.1300	1.27901e+16				1518	LinJ.29.1440	1.72857e+15	1518	LinJ.21.1250	3.34881e+16
			1473	LbrM.35.4690	0.0	1519	LbrM.35.4140	1.2578e+16				1518	LinJ.29.0910	1.72857e+15	1519	LinJ.30.3530	3.34732e+16
			1473	LbrM.33.2880	0.0	1520	LbrM.27.2400	1.25571e+16				1518	LinJ.25.0500	1.72857e+15	1520	LinJ.34.1660	3.33337e+15
			1473	LbrM.27.2380	0.0	1521	LbrM.32.4130	1.25483e+16				1518	LinJ.24.1640	1.72857e+15	1521	LinJ.36.0590	3.32083e+15
			1473	LbrM.26.1370	0.0	1522	LbrM.35.3230	1.2283e+16				1518	LinJ.18.0190	1.72857e+15	1522	LinJ.34.4100	3.25005e+15
			1473	LbrM.26.1230	0.0	1523	LbrM.16.1000	1.227e+16				1518	LinJ.18.0180	1.72857e+15	1523	LinJ.26.0140	3.22359e+15
			1473	LbrM.30.2200	0.0	1524	LbrM.11.0990	1.22044e+16				1518	LinJ.18.0170	1.72857e+15	1524	LinJ.32.2880	3.18544e+16
			1473	LbrM.26.0610	0.0	1525	LbrM.20.3820	1.20416e+16				1518	LinJ.09.0080	1.72857e+15	1525	LinJ.01.0490	3.03649e+15
			1473	LbrM.26.0520	0.0	1526	LbrM.21.1490	1.1982e+16				1526	LinJ.14.1030	1.72041e+16	1526	LinJ.35.5220	3.03074e+16
			1473	LbrM.32.0760	0.0	1527	LbrM.15.0300	1.18864e+16				1527	LinJ.33.1630	1.70809e+16	1527	LinJ.25.1600	3.00538e+16
			1473	LbrM.30.0390	0.0	1528	LbrM.06.1170	1.1619e+16				1528	LinJ.30.0740	1.69126e+16	1528	LinJ.30.1120	2.95444e+15
			1473	LbrM.29.2360	0.0	1529	LbrM.05.0720	1.16089e+15				1529	LinJ.35.1780	1.62349e+16	1529	LinJ.23.0150	2.94221e+15
			1473	LbrM.29.2350	0.0	1530	LbrM.28.2400	1.13974e+16				1530	LinJ.27.1920	1.60423e+15	1530	LinJ.34.1200	2.84677e+16
			1473	LbrM.33.2440	0.0	1531	LbrM.22.1400	1.11941e+16				1531	LinJ.23.1060	1.55456e+16	1531	LinJ.32.3100	2.8229e+16
			1473	LbrM.25.1880	0.0	1532	LbrM.04.1210	1.10309e+15				1532	LinJ.11.0640	1.54463e+16	1532	LinJ.09.1140	2.81754e+15
			1473	LbrM.25.1670	0.0	1533	LbrM.31.2100	1.08925e+16				1533	LinJ.25.1450	1.53891e+16	1533	LinJ.25.0440	2.78654e+15
			1473	LbrM.35.4730	0.0	1534	LbrM.31.3330	1.06093e+15				1534	LinJ.33.2530	1.51591e+15	1534	LinJ.05.0750	2.75357e+15
			1473	LbrM.25.0910	0.0	1535	LbrM.30.2440	1.04983e+15				1535	LinJ.34.3370	2017-05-01	1535	LinJ.22.0220	2.73068e+15
			1473	LbrM.29.1160	0.0	1536	LbrM.12.0500	1.04637e+16				1535	LinJ.29.1550	2017-05-01	1536	LinJ.16.0920	2.71759e+16
			1473	LbrM.25.0810	0.0	1537	LbrM.01.0190	1.01093e+16				1535	LinJ.28.1880	2017-05-01	1537	LinJ.35.1820	2.70142e+16
			1473	LbrM.32.3500	0.0	1538	LbrM.15.1000	9.9326e+15				1538	LinJ.16.0850	1.46871e+16	1538	LinJ.24.1590	2.69756e+16
			1473	LbrM.35.1660	0.0	1539	LbrM.34.4690	9.91552e+15				1539	LinJ.19.1630	1.43935e+16	1539	LinJ.01.0520	2.67049e+16
			1473	LbrM.35.5790	0.0	1540	LbrM.29.1210	9.87677e+15				1540	LinJ.16.0240	1.42129e+16	1540	LinJ.16.0950	2.61188e+15
			1473	LbrM.33.3550	0.0	1541	LbrM.27.1380	944469845474871				1541	LinJ.26.2000	1.40372e+15	1541	LinJ.18.0940	2.60886e+15
			1473	LbrM.28.2300	0.0	1542	LbrM.21.1580	9.39489e+15				1542	LinJ.10.1260	1.33333e+16	1542	LinJ.32.3990	2.60531e+16
			1473	LbrM.24.0830	0.0	1543	LbrM.30.3620	9.26353e+15				1543	LinJ.06.0130	1.25028e+16	1543	LinJ.19.1520	2.59024e+15
			1473	LbrM.24.0650	0.0	1544	LbrM.25.2040	9.2265e+15				1544	LinJ.36.5290	1.24641e+16	1544	LinJ.10.1460	2.57745e+16
			1473	LbrM.23.1640	0.0	1545	LbrM.12.0750	9.20313e+15				1545	LinJ.29.0620	1.23374e+16	1545	LinJ.10.0610	2.57477e+16
			1473	LbrM.31.0760	0.0	1545	LbrM.21.1370	9.20313e+15				1546	LinJ.29.2890	1.23368e+16	1546	LinJ.21.2230	2.5616e+16
			1473	LbrM.23.1300	0.0	1547	LbrM.15.0270	9.13858e+15				1547	LinJ.33.0140	1.20303e+16	1547	LinJ.33.1510	2.53427e+16
			1473	LbrM.23.0920	0.0	1548	LbrM.30.3110	8.85727e+15				1548	LinJ.13.0840	1.10165e+16	1548	LinJ.22.1370	2.49507e+15
			1473	LbrM.23.0680	0.0	1549	LbrM.35.6250	8.81565e+15				1549	LinJ.32.2390	1.10074e+16	1549	LinJ.36.1590	2.46894e+16
			1473	LbrM.30.0150	0.0	1550	LbrM.32.1380	8.53545e+15				1550	LinJ.21.0500	1.04614e+16	1550	LinJ.36.4910	2.46537e+15
			1473	LbrM.23.0160	0.0	1551	LbrM.34.5110	7.96564e+15				1551	LinJ.33.2990	1.04036e+16	1551	LinJ.18.1100	2.45096e+15
			1473	LbrM.23.0130	0.0	1552	LbrM.10.0200	7.92527e+15				1552	LinJ.28.1080	1.01301e+16	1552	LinJ.19.1190	2.43177e+15
			1473	LbrM.22.1560	0.0	1553	LbrM.24.1210	778707465571284				1553	LinJ.06.0340	1.00146e+16	1553	LinJ.36.6570	2.35964e+15
			1473	LbrM.30.3320	0.0	1554	LbrM.35.0080	777490887944647				1554	LinJ.33.2930	9.97149e+15	1554	LinJ.28.0390	2.3504e+16
			1473	LbrM.29.0380	0.0	1555	LbrM.05.0090	7.7286e+15				1555	LinJ.11.0630	9.70176e+15	1554	LinJ.35.1270	2.3504e+16
			1473	LbrM.22.1390	0.0	1556	LbrM.34.0990	7.6605e+15				1556	LinJ.36.2550	9.3406e+15	1556	LinJ.08.1220	2.27743e+15
			1473	LbrM.30.2960	0.0	1557	LbrM.20.0760	7.62872e+15				1557	LinJ.04.1120	9.33443e+15	1557	LinJ.30.2430	2.25058e+16
			1473	LbrM.34.2530	0.0	1558	LbrM.31.0190	7.52188e+15				1558	LinJ.36.2420	9.28986e+15	1558	LinJ.14.0060	2.2345e+15
			1473	LbrM.35.5490	0.0	1559	LbrM.33.2260	6.76286e+15				1559	LinJ.23.1860	8.88636e+15	1559	LinJ.34.0780	2.23431e+15
			1473	LbrM.25.0300	0.0	1560	LbrM.20.4790	6.52403e+15				1560	LinJ.06.1290	8.80704e+15	1560	LinJ.09.0410	2.21369e+16
			1473	LbrM.35.6860	0.0	1561	LbrM.13.0240	650821178395364				1561	LinJ.28.2380	8.71367e+15	1561	LinJ.29.0020	2.20875e+15
			1473	LbrM.24.1700	0.0	1562	LbrM.19.1860	6.33803e+15				1562	LinJ.11.1220	8.55808e+15	1562	LinJ.32.2470	2.19398e+16
			1473	LbrM.21.2000	0.0	1563	LbrM.34.1580	6.24224e+15				1563	LinJ.33.1710	7.92105e+15	1563	LinJ.16.0040	2.18086e+16
			1473	LbrM.21.1760	0.0	1564	LbrM.35.4930	6.03124e+15				1564	LinJ.26.1510	7.75714e+15	1564	LinJ.30.1070	2.05241e+16
			1473	LbrM.28.0460	0.0	1565	LbrM.26.0370	5.98028e+15				1565	LinJ.17.0640	745349892044748	1565	LinJ.20.0020	2.02282e+16
			1473	LbrM.27.1080	0.0	1566	LbrM.23.0970	5.81011e+15				1566	LinJ.03.0370	7.31054e+15	1566	LinJ.02.0010	2.01863e+16
			1473	LbrM.21.0690	0.0	1567	LbrM.19.0180	5.75209e+15				1567	LinJ.36.4420	7.26189e+15	1567	LinJ.17.0770	2.00465e+15
			1473	LbrM.34.4690	0.0	1568	LbrM.35.6550	5.63529e+15				1568	LinJ.36.0940	7.23444e+15	1568	LinJ.31.0770	1.96749e+16
			1473	LbrM.21.0160	0.0	1569	LbrM.24.2190	5.59274e+15				1569	LinJ.35.1660	7.15884e+15	1569	LinJ.17.0680	1.95164e+16
			1473	LbrM.30.3060	0.0	1570	LbrM.34.1320	5.56233e+15				1570	LinJ.35.4830	6.7908e+15	1570	LinJ.35.0990	1.92672e+16
			1473	LbrM.23.0040	0.0	1571	LbrM.33.3090	5.53537e+15				1571	LinJ.03.0910	6.61361e+15	1571	LinJ.13.0600	1.9226e+15
			1473	LbrM.25.1760	0.0	1572	LbrM.24.0840	5.42206e+15				1572	LinJ.05.0740	6.38889e+15	1572	LinJ.35.5320	1.91568e+16
			1473	LbrM.21.0210	0.0	1573	LbrM.15.1530	535846221321857				1573	LinJ.35.3840	6.30596e+15	1573	LinJ.17.1470	1.89473e+15
			1473	LbrM.35.1070	0.0	1574	LbrM.16.1690	5.33732e+15				1574	LinJ.29.0090	6.24522e+15	1574	LinJ.27.2140	1.82869e+16
			1473	LbrM.28.0630	0.0	1575	LbrM.28.2760	5.32103e+15				1575	LinJ.29.0890	6.03987e+15	1575	LinJ.25.2580	1.81759e+16
			1473	LbrM.27.2710	0.0	1576	LbrM.13.0490	5.30895e+15				1576	LinJ.21.1430	5.63209e+15	1576	LinJ.33.1850	1.81587e+16
			1473	LbrM.23.1430	0.0	1577	LbrM.30.2070	5.20579e+15				1577	LinJ.28.2180	534801035169892	1577	LinJ.05.0070	1.81071e+16
			1473	LbrM.33.1610	0.0	1578	LbrM.31.3520	5.12911e+15				1578	LinJ.29.2600	5.29412e+15	1578	LinJ.36.3690	1.80691e+15
			1473	LbrM.35.7010	0.0	1579	LbrM.35.5860	5.11227e+15				1579	LinJ.29.2790	5.25075e+15	1579	LinJ.16.0300	1.78414e+16
			1473	LbrM.20.4120	0.0	1580	LbrM.34.4150	4.96102e+15				1579	LinJ.15.1540	5.25075e+15	1580	LinJ.14.0750	1.72233e+16
			1473	LbrM.32.4150	0.0	1581	LbrM.31.1330	4.9279e+15				1581	LinJ.28.0540	516738690858908	1581	LinJ.36.1390	1.68874e+15
			1473	LbrM.33.1220	0.0	1582	LbrM.20.2330	4.91961e+16				1582	LinJ.18.0200	5.06615e+15	1582	LinJ.35.3110	1.68417e+16
			1473	LbrM.33.3460	0.0	1583	LbrM.26.2630	4.8986e+15				1583	LinJ.04.0760	4.7012e+15	1583	LinJ.18.1010	1.65994e+16
			1473	LbrM.27.2130	0.0	1584	LbrM.19.0720	4.73113e+15				1584	LinJ.18.0650	467384791408429	1584	LinJ.36.2290	1.61219e+16
			1473	LbrM.22.0960	0.0	1585	LbrM.35.5140	467749255355116				1585	LinJ.35.4780	4.37327e+15	1585	LinJ.28.0720	1.59052e+16
			1473	LbrM.20.3470	0.0	1586	LbrM.20.1500	4.58737e+16				1586	LinJ.36.3470	4.22511e+16	1586	LinJ.24.1120	1.58709e+16
			1473	LbrM.20.3200	0.0	1587	LbrM.34.4870	4.48463e+15				1587	LinJ.32.2280	4.05986e+15	1586	LinJ.36.2970	1.58709e+16
			1473	LbrM.32.1740	0.0	1588	LbrM.35.5190	4.45538e+15				1588	LinJ.28.3060	4.03976e+16	1588	LinJ.18.0360	1.54244e+16
			1473	LbrM.31.3220	0.0	1589	LbrM.05.0270	4.45231e+16				1589	LinJ.25.0990	3.81212e+15	1589	LinJ.27.1560	1.52319e+16
			1473	LbrM.30.2360	0.0	1590	LbrM.29.2570	4.38639e+15				1590	LinJ.19.1440	3.70032e+15	1590	LinJ.30.3560	1.44864e+16
			1473	LbrM.35.2950	0.0	1591	LbrM.32.2860	4.27307e+15				1591	LinJ.36.6340	3.19924e+15	1591	LinJ.33.2280	1.43997e+16
			1473	LbrM.20.2950	0.0	1592	LbrM.33.2610	4.24013e+15				1592	LinJ.28.1450	3.16422e+15	1592	LinJ.22.1350	1.41963e+16
			1473	LbrM.20.2770	0.0	1593	LbrM.32.1010	4.23636e+15				1593	LinJ.20.0890	2.95647e+16	1593	LinJ.24.1220	1.37455e+16
			1473	LbrM.29.0960	0.0	1594	LbrM.11.0710	4.19647e+15				1594	LinJ.31.1970	2.94416e+15	1594	LinJ.34.0140	1.35055e+16
			1473	LbrM.22.1590	0.0	1595	LbrM.35.0590	4.15125e+15				1595	LinJ.32.0330	2.91109e+15	1595	LinJ.21.1530	1.34973e+15
			1473	LbrM.35.0770	0.0	1596	LbrM.17.1490	414293112013322				1596	LinJ.21.2170	1.66667e+16	1596	LinJ.36.0040	1.31576e+16
			1473	LbrM.33.0870	0.0	1597	LbrM.31.3590	3.85896e+16				1597	LinJ.36.6020	1.53387e+15	1597	LinJ.12.0810	1.31365e+16
			1473	LbrM.20.2280	0.0	1598	LbrM.23.1450	3.69333e+16				1598	LinJ.32.3230	1.06964e+16	1598	LinJ.17.0990	1.29646e+16
			1473	LbrM.20.2050	0.0	1599	LbrM.10.1370	3.67783e+15				1599	LinJ.15.0720	8.54185e+15	1599	LinJ.20.0670	1.25434e+16
			1473	LbrM.20.1910	0.0	1600	LbrM.31.2790	3.65469e+16				1600	LinJ.25.0300	750163214434091	1600	LinJ.12.0671	1.25213e+16
			1473	LbrM.20.1140	0.0	1601	LbrM.33.1860	3.63974e+16				1601	LinJ.31.2000	6.45161e+15	1600	LinJ.21.1410	1.25213e+16
			1473	LbrM.34.1680	0.0	1602	LbrM.19.0520	3.47055e+16				1602	LinJ.19.0200	5.71429e+15	1602	LinJ.26.0710	1.24747e+16
			1473	LbrM.20.2890	0.0	1603	LbrM.14.0420	3.46413e+16				1603	LinJ.35.3150	4.65116e+16	1603	LinJ.27.1450	1.24299e+16
			1473	LbrM.28.0850	0.0	1604	LbrM.32.3900	3.40012e+15				1604	LinJ.16.0170	1.3986e+16	1604	LinJ.33.0410	1.24071e+16
			1473	LbrM.20.0860	0.0	1605	LbrM.01.0120	3.39166e+16				1604	LinJ.35.3890	1.3986e+16	1605	LinJ.28.2350	1.23251e+16
			1473	LbrM.20.0300	0.0	1606	LbrM.30.0610	328408447089044				1606	LinJ.36.1400	0.0	1606	LinJ.15.1510	1.21623e+16
			1473	LbrM.19.1810	0.0	1607	LbrM.07.0130	3.16367e+16				1606	LinJ.36.0360	0.0	1607	LinJ.17.0930	1.18743e+16
			1473	LbrM.29.1390	0.0	1608	LbrM.25.1040	3.09218e+16				1606	LinJ.35.5040	0.0	1608	LinJ.35.0780	1.1851e+16
			1473	LbrM.19.1770	0.0	1609	LbrM.27.2550	3.0527e+16				1606	LinJ.35.1850	0.0	1609	LinJ.33.1840	1.1847e+16
			1473	LbrM.28.2240	0.0	1610	LbrM.26.1630	3.0337e+16				1606	LinJ.34.3140	0.0	1610	LinJ.15.0280	1.16727e+16
			1473	LbrM.28.1230	0.0	1611	LbrM.20.5530	2.95638e+16				1606	LinJ.34.2180	0.0	1611	LinJ.35.2250	1.15527e+16
			1473	LbrM.35.5060	0.0	1612	LbrM.29.1180	2.94919e+16				1606	LinJ.36.0330	0.0	1612	LinJ.34.3660	1.14473e+16
			1473	LbrM.29.2190	0.0	1613	LbrM.35.6330	2.93167e+16				1606	LinJ.35.1760	0.0	1613	LinJ.34.4230	1.14136e+16
			1473	LbrM.19.0460	0.0	1614	LbrM.25.1460	2.86469e+16				1606	LinJ.34.3080	0.0	1614	LinJ.30.1030	1.11763e+16
			1473	LbrM.19.0440	0.0	1615	LbrM.23.0080	2.82508e+16				1606	LinJ.34.2970	0.0	1615	LinJ.29.2600	1.09969e+16
			1473	LbrM.19.0270	0.0	1616	LbrM.35.6200	2.81028e+16				1606	LinJ.35.1570	0.0	1616	LinJ.30.1390	108607035902362
			1473	LbrM.29.0120	0.0	1617	LbrM.08.0540	2.81027e+16				1606	LinJ.36.4980	0.0	1617	LinJ.15.1600	1.05816e+16
			1473	LbrM.27.0600	0.0	1618	LbrM.14.1670	2.80896e+16				1606	LinJ.34.1190	0.0	1618	LinJ.15.0310	1.05526e+16
			1473	LbrM.25.0950	0.0	1619	LbrM.04.1230	2.70441e+16				1606	LinJ.34.2320	0.0	1619	LinJ.36.3430	1.05124e+16
			1473	LbrM.19.0250	0.0	1620	LbrM.04.0800	2.6764e+16				1606	LinJ.36.5280	0.0	1620	LinJ.16.1000	1.04103e+16
			1473	LbrM.25.0360	0.0	1621	LbrM.08.0080	2.48752e+16				1606	LinJ.32.3890	0.0	1621	LinJ.04.1210	1.02871e+16
			1473	LbrM.18.1570	0.0	1622	LbrM.35.0380	2.48259e+16				1606	LinJ.32.2350	0.0	1622	LinJ.34.0330	9.88786e+15
			1473	LbrM.20.4500	0.0	1623	LbrM.31.3610	2.48076e+16				1606	LinJ.32.0740	0.0	1623	LinJ.31.3070	9.87838e+15
			1473	LbrM.31.3170	0.0	1624	LbrM.03.0350	2.44701e+16				1606	LinJ.32.4060	0.0	1624	LinJ.28.1490	9.78112e+15
			1473	LbrM.18.0880	0.0	1625	LbrM.35.2190	2.37869e+16				1606	LinJ.34.3400	0.0	1625	LinJ.30.2920	9.58068e+15
			1473	LbrM.18.0250	0.0	1626	LbrM.30.0800	2.09887e+16				1606	LinJ.31.0560	0.0	1626	LinJ.36.6170	919886570914381
			1473	LbrM.20.5980	0.0	1627	LbrM.29.1540	2.0				1606	LinJ.32.2580	0.0	1627	LinJ.30.3160	9.03749e+15
			1473	LbrM.18.0130	0.0	1627	LbrM.28.1930	2.0				1606	LinJ.30.3210	0.0	1628	LinJ.15.1020	8.96626e+15
			1473	LbrM.35.1000	0.0	1627	LbrM.31.0530	2.0				1606	LinJ.30.2420	0.0	1629	LinJ.05.0090	8.82424e+15
			1473	LbrM.30.2020	0.0	1630	LbrM.20.2230	1.97766e+16				1606	LinJ.36.3620	0.0	1630	LinJ.21.1590	8.74885e+15
			1473	LbrM.29.0610	0.0	1631	LbrM.14.0880	1.9671e+15				1606	LinJ.35.4760	0.0	1631	LinJ.13.1490	863510709787811
			1473	LbrM.17.1170	0.0	1632	LbrM.31.2840	1.91956e+15				1606	LinJ.30.0720	0.0	1632	LinJ.26.0340	8.5266e+15
			1473	LbrM.17.1150	0.0	1633	LbrM.04.0440	1.88485e+16				1606	LinJ.35.4250	0.0	1633	LinJ.35.4970	8.50879e+15
			1473	LbrM.17.1160	0.0	1634	LbrM.29.2840	1.87584e+15				1606	LinJ.30.0590	0.0	1634	LinJ.20.1350	8.49454e+15
			1473	LbrM.34.4660	0.0	1635	LbrM.24.1170	1.74323e+15				1606	LinJ.30.0260	0.0	1635	LinJ.27.1160	844682146001075
			1473	LbrM.22.1250	0.0	1636	LbrM.29.2430	1.72516e+15				1606	LinJ.33.1080	0.0	1636	LinJ.25.0740	8.38134e+15
			1473	LbrM.27.0040	0.0	1637	LbrM.29.0600	1.68412e+16				1606	LinJ.29.0970	0.0	1636	LinJ.25.0750	8.38134e+15
			1473	LbrM.17.0810	0.0	1638	LbrM.33.0140	1.64139e+16				1606	LinJ.33.2520	0.0	1638	LinJ.35.1410	829120290221754
			1473	LbrM.35.1880	0.0	1639	LbrM.20.0130	1.55199e+16				1606	LinJ.29.0340	0.0	1639	LinJ.32.1290	8.2383e+15
			1473	LbrM.18.0180	0.0	1640	LbrM.15.0210	1.54289e+16				1606	LinJ.29.0400	0.0	1640	LinJ.20.1020	8.20683e+15
			1473	LbrM.32.1900	0.0	1641	LbrM.20.0220	1.53918e+16				1606	LinJ.36.6030	0.0	1641	LinJ.34.3140	808341199541671
			1473	LbrM.16.1160	0.0	1642	LbrM.33.2680	1.53178e+16				1606	LinJ.28.1550	0.0	1642	LinJ.21.0530	7.85253e+15
			1473	LbrM.35.0280	0.0	1643	LbrM.05.0650	1.49946e+16				1606	LinJ.28.1530	0.0	1643	LinJ.20.0110	7.73585e+15
			1473	LbrM.16.0500	0.0	1644	LbrM.35.0560	1.48898e+16				1606	LinJ.28.1490	0.0	1644	LinJ.09.1530	741936922363117
			1473	LbrM.16.0360	0.0	1645	LbrM.35.7380	1.48252e+15				1606	LinJ.28.1460	0.0	1645	LinJ.31.0060	7.34012e+16
			1473	LbrM.16.0240	0.0	1646	LbrM.18.1200	1.47352e+16				1606	LinJ.28.1030	0.0	1645	LinJ.33.1730	7.34012e+16
			1473	LbrM.34.0280	0.0	1647	LbrM.20.3050	1.41632e+15				1606	LinJ.31.0250	0.0	1647	LinJ.32.0750	6.94822e+15
			1473	LbrM.15.1470	0.0	1648	LbrM.35.5310	1.41447e+16				1606	LinJ.28.0870	0.0	1648	LinJ.29.2710	6.64768e+15
			1473	LbrM.32.0620	0.0	1649	LbrM.34.1700	1.37135e+16				1606	LinJ.28.0480	0.0	1649	LinJ.34.0820	6.63238e+15
			1473	LbrM.19.0530	0.0	1650	LbrM.27.2180	1.29316e+16				1606	LinJ.28.0410	0.0	1650	LinJ.35.5130	6.57179e+15
			1473	LbrM.15.0930	0.0	1651	LbrM.26.1920	1.28774e+16				1606	LinJ.28.0150	0.0	1651	LinJ.24.2200	6.5689e+15
			1473	LbrM.15.0700	0.0	1652	LbrM.28.1060	1.24092e+15				1606	LinJ.27.1440	0.0	1652	LinJ.28.2940	6.22627e+15
			1473	LbrM.15.0170	0.0	1653	LbrM.25.2060	1.23859e+16				1606	LinJ.35.3980	0.0	1653	LinJ.19.1660	6.08019e+15
			1473	LbrM.14.1500	0.0	1654	LbrM.11.0410	1.1799e+16				1606	LinJ.27.0510	0.0	1654	LinJ.02.0110	6.07514e+15
			1473	LbrM.14.1370	0.0	1655	LbrM.21.0500	1.16119e+16				1606	LinJ.27.0030	0.0	1655	LinJ.29.1790	5.96779e+15
			1473	LbrM.35.0390	0.0	1656	LbrM.33.3070	1.12786e+16				1606	LinJ.30.0010	0.0	1656	LinJ.11.0140	5.87601e+15
			1473	LbrM.19.1050	0.0	1657	LbrM.29.1240	1.1161e+15				1606	LinJ.36.3130	0.0	1657	LinJ.08.0520	58750101056047
			1473	LbrM.14.0550	0.0	1658	LbrM.06.1230	1.10128e+16				1606	LinJ.26.2270	0.0	1658	LinJ.20.0620	5.83979e+15
			1473	LbrM.14.0240	0.0	1659	LbrM.30.2450	1.08987e+16				1606	LinJ.33.2740	0.0	1659	LinJ.34.1930	5.61521e+16
			1473	LbrM.32.3750	0.0	1660	LbrM.20.1670	1.08514e+15				1606	LinJ.27.2120	0.0	1660	LinJ.19.0400	5.5803e+15
			1473	LbrM.13.1510	0.0	1661	LbrM.07.0810	1.04372e+16				1606	LinJ.26.1330	0.0	1661	LinJ.35.5330	5.52567e+15
			1473	LbrM.14.0890	0.0	1662	LbrM.28.1570	1.0				1606	LinJ.26.1190	0.0	1662	LinJ.34.0050	5.33399e+15
			1473	LbrM.13.1490	0.0	1663	LbrM.29.2740	9.6926e+15				1606	LinJ.30.2260	0.0	1663	LinJ.31.3300	5.31794e+15
			1473	LbrM.31.0620	0.0	1664	LbrM.32.2460	9.58031e+15				1606	LinJ.26.0750	0.0	1664	LinJ.24.0840	5.21017e+15
			1473	LbrM.20.5380	0.0	1665	LbrM.06.0320	9.41017e+15				1606	LinJ.26.0570	0.0	1665	LinJ.16.0680	5.10971e+15
			1473	LbrM.13.1150	0.0	1666	LbrM.09.0080	9.09091e+15				1606	LinJ.26.0490	0.0	1666	LinJ.09.0080	5.08108e+15
			1473	LbrM.13.0540	0.0	1666	LbrM.24.2450	9.09091e+15				1606	LinJ.33.2970	0.0	1666	LinJ.18.0170	5.08108e+15
			1473	LbrM.24.1120	0.0	1666	LbrM.25.0450	9.09091e+15				1606	LinJ.25.2500	0.0	1666	LinJ.18.0180	5.08108e+15
			1473	LbrM.21.1830	0.0	1666	LbrM.29.1440	9.09091e+15				1606	LinJ.25.2400	0.0	1666	LinJ.18.0190	5.08108e+15
			1473	LbrM.27.1870	0.0	1670	LbrM.34.0400	9.07401e+15				1606	LinJ.25.2190	0.0	1666	LinJ.24.1640	5.08108e+15
			1473	LbrM.22.1010	0.0	1671	LbrM.27.0810	8.92061e+15				1606	LinJ.33.2280	0.0	1666	LinJ.25.0500	5.08108e+15
			1473	LbrM.13.0120	0.0	1672	LbrM.19.1230	8.90034e+15				1606	LinJ.32.0710	0.0	1666	LinJ.29.1440	5.08108e+15
			1473	LbrM.13.0070	0.0	1673	LbrM.28.2230	8.50914e+15				1606	LinJ.30.0350	0.0	1673	LinJ.36.5120	5.00036e+15
			1473	LbrM.28.2360	0.0	1674	LbrM.23.0980	8.47363e+15				1606	LinJ.29.2500	0.0	1674	LinJ.04.0380	4.89742e+15
			1473	LbrM.27.0100	0.0	1675	LbrM.26.0330	8.10124e+15				1606	LinJ.29.2490	0.0	1675	LinJ.22.0480	488089843504576
			1473	LbrM.20.2920	0.0	1676	LbrM.16.0860	7.83212e+15				1606	LinJ.36.4710	0.0	1675	LinJ.32.0730	488089843504576
			1473	LbrM.33.2060	0.0	1677	LbrM.16.0240	7.80741e+15				1606	LinJ.30.2430	0.0	1675	LinJ.33.2910	488089843504576
			1473	LbrM.19.0760	0.0	1678	LbrM.17.0570	7.70746e+15				1606	LinJ.25.1060	0.0	1678	LinJ.09.1030	485237838306233
			1473	LbrM.16.0040	0.0	1679	LbrM.17.1370	7.63987e+15				1606	LinJ.29.1190	0.0	1679	LinJ.28.2080	4.73073e+15
			1473	LbrM.35.2970	0.0	1680	LbrM.23.1700	7.30872e+15				1606	LinJ.25.0960	0.0	1680	LinJ.16.1730	4.62759e+15
			1473	LbrM.30.3520	0.0	1681	LbrM.35.4460	7.06287e+15				1606	LinJ.32.3410	0.0	1681	LinJ.32.0970	4.59812e+15
			1473	LbrM.28.3230	0.0	1682	LbrM.28.0530	6.83995e+15				1606	LinJ.36.1580	0.0	1682	LinJ.35.4590	4.57577e+15
			1473	LbrM.25.2430	0.0	1683	LbrM.35.2630	6.53526e+15				1606	LinJ.36.5760	0.0	1683	LinJ.29.2570	4.56705e+15
			1473	LbrM.30.1750	0.0	1684	LbrM.21.1390	6.40226e+15				1606	LinJ.33.3420	0.0	1684	LinJ.01.0090	4.46154e+15
			1473	LbrM.35.4790	0.0	1685	LbrM.09.1530	6.34909e+15				1606	LinJ.28.2250	0.0	1685	LinJ.13.0560	4.45039e+15
			1473	LbrM.21.0890	0.0	1686	LbrM.19.1670	6.06818e+15				1606	LinJ.24.1860	0.0	1686	LinJ.36.5010	4.43355e+15
			1473	LbrM.10.0750	0.0	1687	LbrM.29.0880	5.89671e+15				1606	LinJ.36.1010	0.0	1687	LinJ.05.0280	4.3487e+15
			1473	LbrM.32.2600	0.0	1688	LbrM.35.3540	5.4606e+15				1606	LinJ.28.0650	0.0	1688	LinJ.14.0970	432653080673802
			1473	LbrM.28.0670	0.0	1689	LbrM.34.3780	5.45102e+15				1606	LinJ.27.2460	0.0	1689	LinJ.05.0060	4.23324e+15
			1473	LbrM.29.0480	0.0	1690	LbrM.29.2460	525974025974026				1606	LinJ.24.0830	0.0	1690	LinJ.28.1260	4.19407e+15
			1473	LbrM.10.0290	0.0	1691	LbrM.28.2420	4.58526e+16				1606	LinJ.24.0650	0.0	1691	LinJ.36.0530	4.16054e+15
			1473	LbrM.20.5290	0.0	1691	LbrM.34.4710	4.58526e+16				1606	LinJ.23.1790	0.0	1692	LinJ.05.0740	3.96438e+16
			1473	LbrM.31.1680	0.0	1693	LbrM.34.1570	4.39793e+16				1606	LinJ.23.1570	0.0	1693	LinJ.25.2280	3.9632e+15
			1473	LbrM.14.0040	0.0	1694	LbrM.20.5060	3.60927e+16				1606	LinJ.31.0620	0.0	1694	LinJ.36.5170	3.89189e+16
			1473	LbrM.09.1540	0.0	1695	LbrM.34.4680	3.55054e+16				1606	LinJ.23.1440	0.0	1695	LinJ.08.1100	3.71429e+16
			1473	LbrM.35.0070	0.0	1696	LbrM.31.2160	3.39936e+15				1606	LinJ.23.1000	0.0	1696	LinJ.33.2450	3.59266e+15
			1473	LbrM.29.1820	0.0	1697	LbrM.02.0140	3.22501e+16				1606	LinJ.23.0690	0.0	1697	LinJ.27.1920	3.58024e+16
			1473	LbrM.19.0360	0.0	1698	LbrM.32.2360	3.21e+15				1606	LinJ.23.0680	0.0	1698	LinJ.10.1360	3.57548e+16
			1473	LbrM.17.0260	0.0	1699	LbrM.32.0390	2.51573e+15				1606	LinJ.30.0140	0.0	1699	LinJ.25.1380	3.56329e+15
			1473	LbrM.10.1090	0.0	1700	LbrM.14.0950	2.48681e+16				1606	LinJ.23.0160	0.0	1700	LinJ.35.4220	3.51788e+15
			1473	LbrM.09.1400	0.0	1701	LbrM.04.1220	1.83333e+16				1606	LinJ.23.0130	0.0	1701	LinJ.14.0420	3.4898e+16
			1473	LbrM.27.1200	0.0	1702	LbrM.34.1090	1.1271e+16				1606	LinJ.28.0140	0.0	1702	LinJ.31.2090	3.46509e+16
			1473	LbrM.09.1170	0.0	1703	LbrM.35.2400	3.84615e+16				1606	LinJ.22.1500	0.0	1703	LinJ.30.2830	3.45839e+16
			1473	LbrM.25.2380	0.0	1703	LbrM.09.1550	3.84615e+16				1606	LinJ.30.3330	0.0	1704	LinJ.11.0910	344251812535235
			1473	LbrM.32.3520	0.0	1705	LbrM.16.0170	1.65289e+15				1606	LinJ.29.0450	0.0	1705	LinJ.23.0080	3.42555e+15
			1473	LbrM.09.0220	0.0	1705	LbrM.34.3830	1.65289e+15				1606	LinJ.22.1340	0.0	1706	LinJ.26.1590	3.41993e+16
			1473	LbrM.34.2130	0.0	1707	LbrM.01.0280	0.0				1606	LinJ.30.3010	0.0	1707	LinJ.30.0550	3.3388e+16
			1473	LbrM.30.3590	0.0	1707	LbrM.25.1610	0.0				1606	LinJ.35.2650	0.0	1708	LinJ.36.6160	3.32842e+15
			1473	LbrM.16.1660	0.0	1707	LbrM.18.0370	0.0				1606	LinJ.23.1220	0.0	1709	LinJ.27.2290	3.31227e+16
			1473	LbrM.16.1430	0.0	1707	LbrM.30.1190	0.0				1606	LinJ.34.3670	0.0	1710	LinJ.15.0780	3.21056e+15
			1473	LbrM.09.0060	0.0	1707	LbrM.01.0600	0.0				1606	LinJ.33.3340	0.0	1711	LinJ.33.2990	3.20129e+16
			1473	LbrM.09.0020	0.0	1707	LbrM.33.2930	0.0				1606	LinJ.27.1890	0.0	1712	LinJ.14.1580	3.13694e+15
			1473	LbrM.08.1020	0.0	1707	LbrM.09.0670	0.0				1606	LinJ.22.0880	0.0	1713	LinJ.04.0840	3.0585e+15
			1473	LbrM.30.0410	0.0	1707	LbrM.23.1500	0.0				1606	LinJ.22.0670	0.0	1714	LinJ.10.1430	2.95584e+16
			1473	LbrM.19.1690	0.0	1707	LbrM.26.1450	0.0				1606	LinJ.22.0220	0.0	1715	LinJ.25.1980	2.93157e+15
			1473	LbrM.08.0820	0.0	1707	LbrM.17.0100	0.0				1606	LinJ.36.5470	0.0	1716	LinJ.36.2780	2.79642e+16
			1473	LbrM.27.1000	0.0	1707	LbrM.20.2060	0.0				1606	LinJ.36.0710	0.0	1717	LinJ.36.2080	2.76567e+16
			1473	LbrM.32.2000	0.0	1707	LbrM.26.0760	0.0				1606	LinJ.34.2560	0.0	1718	LinJ.34.0840	2.48996e+16
			1473	LbrM.08.0320	0.0	1707	LbrM.34.3430	0.0				1606	LinJ.21.2180	0.0	1719	LinJ.23.1590	2.39931e+16
			1473	LbrM.33.1520	0.0	1707	LbrM.25.1790	0.0				1606	LinJ.36.6810	0.0	1720	LinJ.32.0240	2.39579e+15
			1473	LbrM.20.2150	0.0	1707	LbrM.02.0610	0.0				1606	LinJ.24.1710	0.0	1721	LinJ.06.1240	2.37885e+16
			1473	LbrM.31.1510	0.0	1707	LbrM.25.0210	0.0				1606	LinJ.24.0420	0.0	1722	LinJ.18.0160	2.37536e+15
			1473	LbrM.29.0630	0.0	1707	LbrM.30.1170	0.0				1606	LinJ.21.2060	0.0	1723	LinJ.36.4640	2.34225e+15
			1473	LbrM.27.1050	0.0	1707	LbrM.16.0210	0.0				1606	LinJ.21.1880	0.0	1724	LinJ.11.1180	2.236e+16
			1473	LbrM.23.0420	0.0	1707	LbrM.03.0900	0.0				1606	LinJ.21.1870	0.0	1725	LinJ.24.1180	2.13246e+16
			1473	LbrM.15.0820	0.0	1707	LbrM.24.0500	0.0				1606	LinJ.28.0310	0.0	1726	LinJ.33.0280	2.0
			1473	LbrM.35.0790	0.0	1707	LbrM.03.0030	0.0				1606	LinJ.27.0860	0.0	1727	LinJ.31.0860	1.90022e+16
			1473	LbrM.28.1290	0.0	1707	LbrM.20.4680	0.0				1606	LinJ.21.0690	0.0	1728	LinJ.36.4220	1.83792e+16
			1473	LbrM.07.1130	0.0	1707	LbrM.21.2020	0.0				1606	LinJ.21.0170	0.0	1729	LinJ.34.2500	1.82448e+15
			1473	LbrM.29.1230	0.0	1707	LbrM.03.0360	0.0				1606	LinJ.21.0160	0.0	1730	LinJ.20.1720	1.79456e+16
			1473	LbrM.29.1220	0.0	1707	LbrM.03.0580	0.0				1606	LinJ.25.1310	0.0	1730	LinJ.30.1440	1.79456e+16
			1473	LbrM.26.0830	0.0	1707	LbrM.07.0840	0.0				1606	LinJ.30.3110	0.0	1732	LinJ.07.0820	1.78599e+16
			1473	LbrM.15.1080	0.0	1707	LbrM.03.0650	0.0				1606	LinJ.23.0040	0.0	1733	LinJ.29.0520	1.73776e+16
			1473	LbrM.29.2510	0.0	1707	LbrM.03.0840	0.0				1606	LinJ.25.2280	0.0	1734	LinJ.34.0230	1.6927e+16
			1473	LbrM.07.0460	0.0	1707	LbrM.22.1280	0.0				1606	LinJ.21.0210	0.0	1735	LinJ.33.1630	1.67653e+16
			1473	LbrM.07.0450	0.0	1707	LbrM.35.2000	0.0				1606	LinJ.33.1420	0.0	1736	LinJ.23.1060	1.61783e+16
			1473	LbrM.07.0200	0.0	1707	LbrM.07.0700	0.0				1606	LinJ.32.2600	0.0	1737	LinJ.35.1780	1.55762e+16
			1473	LbrM.35.0150	0.0	1707	LbrM.04.0110	0.0				1606	LinJ.20.0670	0.0	1738	LinJ.36.0320	1.55235e+15
			1473	LbrM.34.3120	0.0	1707	LbrM.33.1200	0.0				1606	LinJ.20.0540	0.0	1739	LinJ.12.0370	1.55049e+16
			1473	LbrM.32.1000	0.0	1707	LbrM.04.0170	0.0				1606	LinJ.31.2960	0.0	1740	LinJ.28.1880	2017-05-01
			1473	LbrM.28.2880	0.0	1707	LbrM.14.1280	0.0				1606	LinJ.20.0040	0.0	1740	LinJ.29.1550	2017-05-01
			1473	LbrM.20.0820	0.0	1707	LbrM.09.0430	0.0				1606	LinJ.19.1580	0.0	1740	LinJ.34.3370	2017-05-01
			1473	LbrM.34.0140	0.0	1707	LbrM.28.0180	0.0				1606	LinJ.29.1400	0.0	1743	LinJ.33.2530	1.47403e+16
			1473	LbrM.16.1370	0.0	1707	LbrM.27.1980	0.0				1606	LinJ.19.1540	0.0	1744	LinJ.29.0610	1.4395e+16
			1473	LbrM.16.1360	0.0	1707	LbrM.27.2390	0.0				1606	LinJ.28.2190	0.0	1745	LinJ.16.0850	1.41185e+16
			1473	LbrM.06.1060	0.0	1707	LbrM.27.1460	0.0				1606	LinJ.19.0960	0.0	1746	LinJ.29.2890	1.39948e+15
			1473	LbrM.29.1210	0.0	1707	LbrM.26.0340	0.0				1606	LinJ.19.0740	0.0	1747	LinJ.09.1540	1.37125e+16
			1473	LbrM.20.5910	0.0	1707	LbrM.31.3290	0.0				1606	LinJ.36.5040	0.0	1748	LinJ.26.2000	1.3243e+16
			1473	LbrM.16.0270	0.0	1707	LbrM.32.0570	0.0				1606	LinJ.29.2320	0.0	1749	LinJ.36.0500	1.29575e+16
			1473	LbrM.06.0910	0.0	1707	LbrM.16.0670	0.0				1606	LinJ.22.1220	0.0	1750	LinJ.19.1630	1.23961e+16
			1473	LbrM.06.0870	0.0	1707	LbrM.05.0060	0.0				1606	LinJ.19.0140	0.0	1751	LinJ.33.0140	1.23779e+16
			1473	LbrM.15.1510	0.0	1707	LbrM.24.0240	0.0				1606	LinJ.19.0120	0.0	1752	LinJ.30.0740	1.23394e+15
			1473	LbrM.19.1500	0.0	1707	LbrM.05.0180	0.0				1606	LinJ.18.1530	0.0	1753	LinJ.06.0340	1.19974e+16
			1473	LbrM.06.0470	0.0	1707	LbrM.05.0320	0.0				1606	LinJ.20.0310	0.0	1754	LinJ.06.0130	1.19685e+16
			1473	LbrM.16.0320	0.0	1707	LbrM.06.1030	0.0				1606	LinJ.31.2910	0.0	1755	LinJ.36.6950	1.17224e+16
			1473	LbrM.20.3980	0.0	1707	LbrM.20.4780	0.0				1606	LinJ.18.0790	0.0	1756	LinJ.33.1350	1.16206e+16
			1473	LbrM.31.0050	0.0	1707	LbrM.05.0670	0.0				1606	LinJ.18.0370	0.0	1757	LinJ.32.0830	1.13456e+16
			1473	LbrM.22.1330	0.0	1707	LbrM.32.1460	0.0				1606	LinJ.18.0230	0.0	1758	LinJ.23.1470	1.09719e+15
			1473	LbrM.07.1220	0.0	1707	LbrM.32.1390	0.0				1606	LinJ.20.1790	0.0	1759	LinJ.10.1400	1.09678e+16
			1473	LbrM.06.0080	0.0	1707	LbrM.35.7150	0.0				1606	LinJ.18.0110	0.0	1760	LinJ.06.1290	1.08368e+16
			1473	LbrM.33.0860	0.0	1707	LbrM.33.0860	0.0				1606	LinJ.17.1550	0.0	1761	LinJ.25.1450	1.07212e+16
			1473	LbrM.35.7150	0.0	1707	LbrM.06.0080	0.0				1606	LinJ.30.2080	0.0	1762	LinJ.36.5290	1.06637e+16
			1473	LbrM.32.1390	0.0	1707	LbrM.31.0050	0.0				1606	LinJ.17.1160	0.0	1763	LinJ.21.0500	1.00316e+16
			1473	LbrM.32.1460	0.0	1707	LbrM.22.1330	0.0				1606	LinJ.17.1140	0.0	1764	LinJ.36.0940	1.00096e+16
			1473	LbrM.05.0670	0.0	1707	LbrM.16.0320	0.0				1606	LinJ.17.1150	0.0	1765	LinJ.11.1220	9.57844e+15
			1473	LbrM.35.6110	0.0	1707	LbrM.06.0470	0.0				1606	LinJ.20.1730	0.0	1766	LinJ.28.1080	9.36203e+15
			1473	LbrM.20.4780	0.0	1707	LbrM.19.1500	0.0				1606	LinJ.22.1160	0.0	1767	LinJ.11.0630	9.34364e+15
			1473	LbrM.06.1030	0.0	1707	LbrM.15.1510	0.0				1606	LinJ.16.1760	0.0	1768	LinJ.36.2420	9.23256e+15
			1473	LbrM.05.0320	0.0	1707	LbrM.06.0910	0.0				1606	LinJ.36.1770	0.0	1769	LinJ.33.2930	8.87994e+15
			1473	LbrM.05.0180	0.0	1707	LbrM.16.0270	0.0				1606	LinJ.32.1810	0.0	1770	LinJ.35.4780	8.80497e+15
			1473	LbrM.24.0240	0.0	1707	LbrM.20.5910	0.0				1606	LinJ.16.1170	0.0	1771	LinJ.23.1860	8.66672e+15
			1473	LbrM.05.0060	0.0	1707	LbrM.06.1060	0.0				1606	LinJ.31.2600	0.0	1772	LinJ.04.1120	8.61434e+15
			1473	LbrM.32.0570	0.0	1707	LbrM.34.0140	0.0				1606	LinJ.36.0220	0.0	1773	LinJ.34.3810	858315580659912
			1473	LbrM.16.0670	0.0	1707	LbrM.20.0820	0.0				1606	LinJ.16.0490	0.0	1774	LinJ.13.0840	8.5784e+15
			1473	LbrM.31.3290	0.0	1707	LbrM.34.3120	0.0				1606	LinJ.16.0360	0.0	1775	LinJ.19.0910	8.527e+15
			1473	LbrM.26.0340	0.0	1707	LbrM.28.2880	0.0				1606	LinJ.29.2550	0.0	1776	LinJ.29.0620	8.5143e+15
			1473	LbrM.27.1460	0.0	1707	LbrM.32.1000	0.0				1606	LinJ.35.0240	0.0	1777	LinJ.14.1030	8.09527e+15
			1473	LbrM.28.0180	0.0	1707	LbrM.07.0200	0.0				1606	LinJ.15.1530	0.0	1778	LinJ.36.2550	774936549381562
			1473	LbrM.27.2390	0.0	1707	LbrM.07.0450	0.0				1606	LinJ.32.0490	0.0	1779	LinJ.14.0920	7.73775e+15
			1473	LbrM.27.1980	0.0	1707	LbrM.07.0460	0.0				1606	LinJ.15.0950	0.0	1780	LinJ.32.2390	7.68402e+15
			1473	LbrM.14.1280	0.0	1707	LbrM.29.2510	0.0				1606	LinJ.15.0530	0.0	1781	LinJ.29.1920	7.64049e+15
			1473	LbrM.09.0430	0.0	1707	LbrM.07.1130	0.0				1606	LinJ.15.0180	0.0	1782	LinJ.26.1510	7.43146e+15
			1473	LbrM.04.0170	0.0	1707	LbrM.28.1290	0.0				1606	LinJ.14.1410	0.0	1783	LinJ.03.0370	7.26168e+15
			1473	LbrM.04.0110	0.0	1707	LbrM.35.0790	0.0				1606	LinJ.14.1280	0.0	1784	LinJ.34.3250	7.17147e+15
			1473	LbrM.33.1200	0.0	1707	LbrM.15.0820	0.0				1606	LinJ.14.0580	0.0	1785	LinJ.11.0970	6.9133e+15
			1473	LbrM.07.0700	0.0	1707	LbrM.29.0630	0.0				1606	LinJ.14.0240	0.0	1785	LinJ.35.1670	6.9133e+15
			1473	LbrM.35.2000	0.0	1707	LbrM.23.0420	0.0				1606	LinJ.29.2770	0.0	1787	LinJ.36.4420	6.85493e+15
			1473	LbrM.22.1280	0.0	1707	LbrM.27.1050	0.0				1606	LinJ.32.3660	0.0	1788	LinJ.17.0640	6.6731e+15
			1473	LbrM.03.0840	0.0	1707	LbrM.31.1510	0.0				1606	LinJ.31.0480	0.0	1789	LinJ.35.1660	6.39827e+15
			1473	LbrM.07.0840	0.0	1707	LbrM.20.2150	0.0				1606	LinJ.20.1220	0.0	1790	LinJ.35.3840	6.28369e+15
			1473	LbrM.03.0650	0.0	1707	LbrM.33.1520	0.0				1606	LinJ.27.1650	0.0	1791	LinJ.29.0890	586006525865254
			1473	LbrM.03.0580	0.0	1707	LbrM.08.0320	0.0				1606	LinJ.22.0930	0.0	1792	LinJ.03.0910	5.47198e+15
			1473	LbrM.03.0360	0.0	1707	LbrM.27.1000	0.0				1606	LinJ.13.1390	0.0	1793	LinJ.28.2180	5.13705e+15
			1473	LbrM.21.2020	0.0	1707	LbrM.08.0820	0.0				1606	LinJ.13.1370	0.0	1794	LinJ.28.0540	5.06157e+15
			1473	LbrM.20.4680	0.0	1707	LbrM.30.0410	0.0				1606	LinJ.13.1280	0.0	1795	LinJ.29.2790	5.01863e+15
			1473	LbrM.35.4140	0.0	1707	LbrM.19.1690	0.0				1606	LinJ.13.0610	0.0	1796	LinJ.29.0090	4.62856e+15
			1473	LbrM.24.0500	0.0	1707	LbrM.08.1020	0.0				1606	LinJ.33.0240	0.0	1797	LinJ.04.0760	4.60353e+16
			1473	LbrM.03.0900	0.0	1707	LbrM.09.0020	0.0				1606	LinJ.24.1130	0.0	1798	LinJ.35.4810	4.58579e+16
			1473	LbrM.03.0030	0.0	1707	LbrM.09.0060	0.0				1606	LinJ.21.1690	0.0	1799	LinJ.21.1430	4.53265e+15
			1473	LbrM.30.1170	0.0	1707	LbrM.16.1660	0.0				1606	LinJ.16.0390	0.0	1800	LinJ.32.2280	3.3849e+15
			1473	LbrM.25.0210	0.0	1707	LbrM.34.2130	0.0				1606	LinJ.13.0130	0.0	1801	LinJ.36.3470	3.30593e+15
			1473	LbrM.16.0210	0.0	1707	LbrM.09.0220	0.0				1606	LinJ.13.0080	0.0	1802	LinJ.19.1440	2.97652e+15
			1473	LbrM.02.0610	0.0	1707	LbrM.32.3520	0.0				1606	LinJ.32.0870	0.0	1803	LinJ.20.0890	2.94094e+16
			1473	LbrM.25.1790	0.0	1707	LbrM.25.2380	0.0				1606	LinJ.28.2310	0.0	1804	LinJ.31.1970	2.84632e+15
			1473	LbrM.34.3430	0.0	1707	LbrM.10.1090	0.0				1606	LinJ.20.1190	0.0	1805	LinJ.18.0290	2.43043e+16
			1473	LbrM.26.0760	0.0	1707	LbrM.17.0260	0.0				1606	LinJ.12.0140	0.0	1806	LinJ.32.0330	2.42896e+16
			1473	LbrM.20.2060	0.0	1707	LbrM.09.1400	0.0				1606	LinJ.11.1180	0.0	1807	LinJ.28.1450	2.40643e+16
			1473	LbrM.17.0100	0.0	1707	LbrM.35.0070	0.0				1606	LinJ.34.3110	0.0	1808	LinJ.21.2170	1.66667e+16
			1473	LbrM.10.0950	0.0	1707	LbrM.19.0360	0.0				1606	LinJ.34.2880	0.0	1809	LinJ.23.1980	1.5444e+16
			1473	LbrM.26.1450	0.0	1707	LbrM.29.1820	0.0				1606	LinJ.27.0090	0.0	1810	LinJ.36.6020	1.46389e+16
			1473	LbrM.23.1500	0.0	1707	LbrM.14.0040	0.0				1606	LinJ.33.1900	0.0	1811	LinJ.25.0300	8.55279e+15
			1473	LbrM.09.0670	0.0	1707	LbrM.20.5290	0.0				1606	LinJ.19.0440	0.0	1812	LinJ.15.0720	7.59334e+15
			1473	LbrM.33.2930	0.0	1707	LbrM.31.1680	0.0				1606	LinJ.11.0840	0.0	1813	LinJ.19.0200	5.71429e+15
			1473	LbrM.01.0600	0.0	1707	LbrM.10.0290	0.0				1606	LinJ.18.1110	0.0	1814	LinJ.16.0170	1.3986e+16
			1473	LbrM.30.1190	0.0	1707	LbrM.29.0480	0.0				1606	LinJ.16.0040	0.0	1814	LinJ.35.3890	1.3986e+16
			1473	LbrM.18.0370	0.0	1707	LbrM.32.2600	0.0				1606	LinJ.30.3530	0.0	1816	LinJ.20.0610	0.0
			1473	LbrM.25.1610	0.0	1707	LbrM.28.0670	0.0				1606	LinJ.28.3250	0.0	1816	LinJ.05.0660	0.0
			1473	LbrM.01.0280	0.0	1707	LbrM.10.0750	0.0				1606	LinJ.25.1640	0.0	1816	LinJ.05.0680	0.0
						1707	LbrM.21.0890	0.0				1606	LinJ.25.0420	0.0	1816	LinJ.32.1360	0.0
						1707	LbrM.35.4790	0.0				1606	LinJ.29.0110	0.0	1816	LinJ.32.1300	0.0
						1707	LbrM.28.3230	0.0				1606	LinJ.27.0500	0.0	1816	LinJ.36.7110	0.0
						1707	LbrM.25.2430	0.0				1606	LinJ.25.1100	0.0	1816	LinJ.06.0080	0.0
						1707	LbrM.30.3520	0.0				1606	LinJ.11.0070	0.0	1816	LinJ.06.0090	0.0
						1707	LbrM.16.0040	0.0				1606	LinJ.11.0050	0.0	1816	LinJ.22.1300	0.0
						1707	LbrM.19.0760	0.0				1606	LinJ.30.1710	0.0	1816	LinJ.16.0320	0.0
						1707	LbrM.20.2920	0.0				1606	LinJ.21.1160	0.0	1816	LinJ.06.0480	0.0
						1707	LbrM.33.2060	0.0				1606	LinJ.19.0040	0.0	1816	LinJ.19.1270	0.0
						1707	LbrM.27.0100	0.0				1606	LinJ.17.1320	0.0	1816	LinJ.19.1280	0.0
						1707	LbrM.28.2360	0.0				1606	LinJ.10.1070	0.0	1816	LinJ.15.1580	0.0
						1707	LbrM.13.0070	0.0				1606	LinJ.36.4770	0.0	1816	LinJ.06.0960	0.0
						1707	LbrM.13.0120	0.0				1606	LinJ.21.0880	0.0	1816	LinJ.16.0270	0.0
						1707	LbrM.27.1870	0.0				1606	LinJ.10.0660	0.0	1816	LinJ.28.2380	0.0
						1707	LbrM.22.1010	0.0				1606	LinJ.32.2510	0.0	1816	LinJ.31.1140	0.0
						1707	LbrM.24.1120	0.0				1606	LinJ.28.0690	0.0	1816	LinJ.06.1120	0.0
						1707	LbrM.21.1830	0.0				1606	LinJ.29.0550	0.0	1816	LinJ.07.0040	0.0
						1707	LbrM.13.0540	0.0				1606	LinJ.10.0290	0.0	1816	LinJ.35.0100	0.0
						1707	LbrM.13.1150	0.0				1606	LinJ.20.1150	0.0	1816	LinJ.35.1540	0.0
						1707	LbrM.20.5380	0.0				1606	LinJ.31.1490	0.0	1816	LinJ.07.0290	0.0
						1707	LbrM.31.0620	0.0				1606	LinJ.10.0070	0.0	1816	LinJ.28.2870	0.0
						1707	LbrM.14.0890	0.0				1606	LinJ.14.0040	0.0	1816	LinJ.32.0960	0.0
						1707	LbrM.13.1510	0.0				1606	LinJ.09.1560	0.0	1816	LinJ.35.3260	0.0
						1707	LbrM.13.1490	0.0				1606	LinJ.27.0980	0.0	1816	LinJ.07.0360	0.0
						1707	LbrM.32.3750	0.0				1606	LinJ.09.1180	0.0	1816	LinJ.35.0850	0.0
						1707	LbrM.14.0240	0.0				1606	LinJ.25.1690	0.0	1816	LinJ.07.1230	0.0
						1707	LbrM.14.0550	0.0				1606	LinJ.32.3430	0.0	1816	LinJ.28.1300	0.0
						1707	LbrM.35.0390	0.0				1606	LinJ.09.0430	0.0	1816	LinJ.36.0730	0.0
						1707	LbrM.19.1050	0.0				1606	LinJ.15.0060	0.0	1816	LinJ.34.2420	0.0
						1707	LbrM.14.1370	0.0				1606	LinJ.16.1450	0.0	1816	LinJ.33.1370	0.0
						1707	LbrM.14.1500	0.0				1606	LinJ.09.0060	0.0	1816	LinJ.08.0290	0.0
						1707	LbrM.15.0700	0.0				1606	LinJ.09.0020	0.0	1816	LinJ.27.0780	0.0
						1707	LbrM.15.0930	0.0				1606	LinJ.08.1000	0.0	1816	LinJ.08.0660	0.0
						1707	LbrM.19.0530	0.0				1606	LinJ.30.0370	0.0	1816	LinJ.19.1460	0.0
						1707	LbrM.32.0620	0.0				1606	LinJ.19.1460	0.0	1816	LinJ.30.0370	0.0
						1707	LbrM.16.0360	0.0				1606	LinJ.08.0950	0.0	1816	LinJ.08.1000	0.0
						1707	LbrM.35.0280	0.0				1606	LinJ.08.0660	0.0	1816	LinJ.09.0020	0.0
						1707	LbrM.16.0500	0.0				1606	LinJ.27.0780	0.0	1816	LinJ.09.0060	0.0
						1707	LbrM.16.1160	0.0				1606	LinJ.08.0290	0.0	1816	LinJ.15.0060	0.0
						1707	LbrM.32.1900	0.0				1606	LinJ.33.1370	0.0	1816	LinJ.09.0430	0.0
						1707	LbrM.35.1880	0.0				1606	LinJ.34.2420	0.0	1816	LinJ.32.3430	0.0
						1707	LbrM.18.0180	0.0				1606	LinJ.36.0730	0.0	1816	LinJ.25.1690	0.0
						1707	LbrM.17.0810	0.0				1606	LinJ.28.1300	0.0	1816	LinJ.14.0040	0.0
						1707	LbrM.27.0040	0.0				1606	LinJ.07.1230	0.0	1816	LinJ.10.0070	0.0
						1707	LbrM.22.1250	0.0				1606	LinJ.35.0850	0.0	1816	LinJ.31.1490	0.0
						1707	LbrM.17.1150	0.0				1606	LinJ.07.0360	0.0	1816	LinJ.20.1150	0.0
						1707	LbrM.34.4660	0.0				1606	LinJ.36.0090	0.0	1816	LinJ.10.0290	0.0
						1707	LbrM.17.1160	0.0				1606	LinJ.35.3260	0.0	1816	LinJ.29.0550	0.0
						1707	LbrM.17.1170	0.0				1606	LinJ.34.4020	0.0	1816	LinJ.28.0690	0.0
						1707	LbrM.29.0610	0.0				1606	LinJ.34.0900	0.0	1816	LinJ.32.2510	0.0
						1707	LbrM.30.2020	0.0				1606	LinJ.32.0960	0.0	1816	LinJ.10.0660	0.0
						1707	LbrM.35.1000	0.0				1606	LinJ.28.2870	0.0	1816	LinJ.21.0880	0.0
						1707	LbrM.20.5980	0.0				1606	LinJ.07.0290	0.0	1816	LinJ.36.4770	0.0
						1707	LbrM.18.0130	0.0				1606	LinJ.35.1540	0.0	1816	LinJ.10.1070	0.0
						1707	LbrM.18.0250	0.0				1606	LinJ.35.0100	0.0	1816	LinJ.17.1320	0.0
						1707	LbrM.31.3170	0.0				1606	LinJ.16.1390	0.0	1816	LinJ.19.0040	0.0
						1707	LbrM.18.0880	0.0				1606	LinJ.07.0040	0.0	1816	LinJ.21.1160	0.0
						1707	LbrM.25.0360	0.0				1606	LinJ.06.1120	0.0	1816	LinJ.11.0050	0.0
						1707	LbrM.20.4500	0.0				1606	LinJ.31.1140	0.0	1816	LinJ.11.0070	0.0
						1707	LbrM.18.1570	0.0				1606	LinJ.29.1230	0.0	1816	LinJ.25.1100	0.0
						1707	LbrM.27.0600	0.0				1606	LinJ.16.0270	0.0	1816	LinJ.27.0500	0.0
						1707	LbrM.29.0120	0.0				1606	LinJ.06.0960	0.0	1816	LinJ.29.0110	0.0
						1707	LbrM.19.0250	0.0				1606	LinJ.31.2400	0.0	1816	LinJ.25.0420	0.0
						1707	LbrM.25.0950	0.0				1606	LinJ.15.1580	0.0	1816	LinJ.25.1640	0.0
						1707	LbrM.19.0440	0.0				1606	LinJ.19.1280	0.0	1816	LinJ.28.3250	0.0
						1707	LbrM.19.0460	0.0				1606	LinJ.19.1270	0.0	1816	LinJ.18.1110	0.0
						1707	LbrM.19.0270	0.0				1606	LinJ.06.0480	0.0	1816	LinJ.11.0840	0.0
						1707	LbrM.29.2190	0.0				1606	LinJ.16.0320	0.0	1816	LinJ.19.0440	0.0
						1707	LbrM.28.2240	0.0				1606	LinJ.33.1730	0.0	1816	LinJ.33.1900	0.0
						1707	LbrM.19.1770	0.0				1606	LinJ.31.0060	0.0	1816	LinJ.27.0090	0.0
						1707	LbrM.35.5060	0.0				1606	LinJ.22.1300	0.0	1816	LinJ.34.2880	0.0
						1707	LbrM.28.1230	0.0				1606	LinJ.06.0090	0.0	1816	LinJ.34.3110	0.0
						1707	LbrM.29.1390	0.0				1606	LinJ.06.0080	0.0	1816	LinJ.12.0140	0.0
						1707	LbrM.19.1810	0.0				1606	LinJ.36.7110	0.0	1816	LinJ.20.1190	0.0
						1707	LbrM.28.0850	0.0				1606	LinJ.32.1300	0.0	1816	LinJ.28.2310	0.0
						1707	LbrM.20.0300	0.0				1606	LinJ.32.1360	0.0	1816	LinJ.13.0080	0.0
						1707	LbrM.34.1680	0.0				1606	LinJ.05.0680	0.0	1816	LinJ.13.0130	0.0
						1707	LbrM.20.2890	0.0				1606	LinJ.05.0660	0.0	1816	LinJ.16.0390	0.0
						1707	LbrM.20.1140	0.0				1606	LinJ.20.0610	0.0	1816	LinJ.21.1690	0.0
						1707	LbrM.20.1910	0.0				1606	LinJ.05.0470	0.0	1816	LinJ.24.1130	0.0
						1707	LbrM.20.2280	0.0				1606	LinJ.05.0330	0.0	1816	LinJ.33.0240	0.0
						1707	LbrM.33.0870	0.0				1606	LinJ.35.4790	0.0	1816	LinJ.13.0610	0.0
						1707	LbrM.22.1590	0.0				1606	LinJ.05.0180	0.0	1816	LinJ.13.1280	0.0
						1707	LbrM.35.0770	0.0				1606	LinJ.24.0240	0.0	1816	LinJ.13.1370	0.0
						1707	LbrM.20.2770	0.0				1606	LinJ.31.3030	0.0	1816	LinJ.13.1390	0.0
						1707	LbrM.29.0960	0.0				1606	LinJ.26.0300	0.0	1816	LinJ.22.0930	0.0
						1707	LbrM.30.2360	0.0				1606	LinJ.29.1250	0.0	1816	LinJ.27.1650	0.0
						1707	LbrM.32.1740	0.0				1606	LinJ.29.1240	0.0	1816	LinJ.20.1220	0.0
						1707	LbrM.31.3220	0.0				1606	LinJ.27.1240	0.0	1816	LinJ.31.0480	0.0
						1707	LbrM.22.0960	0.0				1606	LinJ.34.1950	0.0	1816	LinJ.32.3660	0.0
						1707	LbrM.20.3200	0.0				1606	LinJ.34.1530	0.0	1816	LinJ.29.2770	0.0
						1707	LbrM.33.1220	0.0				1606	LinJ.27.2130	0.0	1816	LinJ.14.0240	0.0
						1707	LbrM.32.4150	0.0				1606	LinJ.09.0470	0.0	1816	LinJ.14.0580	0.0
						1707	LbrM.27.2130	0.0				1606	LinJ.04.0470	0.0	1816	LinJ.14.1280	0.0
						1707	LbrM.20.4120	0.0				1606	LinJ.04.0130	0.0	1816	LinJ.14.1410	0.0
						1707	LbrM.23.1430	0.0				1606	LinJ.04.0070	0.0	1816	LinJ.15.0180	0.0
						1707	LbrM.35.1070	0.0				1606	LinJ.32.3870	0.0	1816	LinJ.15.0530	0.0
						1707	LbrM.21.0210	0.0				1606	LinJ.04.0020	0.0	1816	LinJ.15.0950	0.0
						1707	LbrM.27.2710	0.0				1606	LinJ.33.1060	0.0	1816	LinJ.32.0490	0.0
						1707	LbrM.28.0630	0.0				1606	LinJ.07.0510	0.0	1816	LinJ.29.2550	0.0
						1707	LbrM.23.0040	0.0				1606	LinJ.10.1030	0.0	1816	LinJ.16.0360	0.0
						1707	LbrM.30.3060	0.0				1606	LinJ.10.0190	0.0	1816	LinJ.16.0490	0.0
						1707	LbrM.21.0160	0.0				1606	LinJ.07.0870	0.0	1816	LinJ.36.0220	0.0
						1707	LbrM.21.0690	0.0				1606	LinJ.03.0730	0.0	1816	LinJ.31.2600	0.0
						1707	LbrM.27.1080	0.0				1606	LinJ.03.0660	0.0	1816	LinJ.16.1170	0.0
						1707	LbrM.28.0460	0.0				1606	LinJ.03.0480	0.0	1816	LinJ.32.1810	0.0
						1707	LbrM.21.1760	0.0				1606	LinJ.32.1650	0.0	1816	LinJ.36.1770	0.0
						1707	LbrM.24.1700	0.0				1606	LinJ.21.2080	0.0	1816	LinJ.16.1760	0.0
						1707	LbrM.35.6860	0.0				1606	LinJ.20.0500	0.0	1816	LinJ.22.1160	0.0
						1707	LbrM.21.2000	0.0				1606	LinJ.35.2890	0.0	1816	LinJ.20.1730	0.0
						1707	LbrM.25.0300	0.0				1606	LinJ.31.1630	0.0	1816	LinJ.17.1150	0.0
						1707	LbrM.35.5490	0.0				1606	LinJ.24.0500	0.0	1816	LinJ.17.1140	0.0
						1707	LbrM.30.2960	0.0				1606	LinJ.03.0010	0.0	1816	LinJ.17.1160	0.0
						1707	LbrM.34.2530	0.0				1606	LinJ.36.4670	0.0	1816	LinJ.30.2080	0.0
						1707	LbrM.30.3320	0.0				1606	LinJ.30.1110	0.0	1816	LinJ.18.0110	0.0
						1707	LbrM.22.1560	0.0				1606	LinJ.25.0210	0.0	1816	LinJ.20.1790	0.0
						1707	LbrM.22.1390	0.0				1606	LinJ.16.0210	0.0	1816	LinJ.18.0230	0.0
						1707	LbrM.29.0380	0.0				1606	LinJ.02.0600	0.0	1816	LinJ.18.0370	0.0
						1707	LbrM.30.0150	0.0				1606	LinJ.07.0440	0.0	1816	LinJ.18.0790	0.0
						1707	LbrM.23.0130	0.0				1606	LinJ.25.2310	0.0	1816	LinJ.31.2910	0.0
						1707	LbrM.23.0160	0.0				1606	LinJ.04.1230	0.0	1816	LinJ.20.0310	0.0
						1707	LbrM.23.1300	0.0				1606	LinJ.02.0290	0.0	1816	LinJ.18.1530	0.0
						1707	LbrM.31.0760	0.0				1606	LinJ.31.1300	0.0	1816	LinJ.19.0120	0.0
						1707	LbrM.23.0680	0.0				1606	LinJ.23.0430	0.0	1816	LinJ.19.0140	0.0
						1707	LbrM.23.0920	0.0				1606	LinJ.11.1240	0.0	1816	LinJ.22.1220	0.0
						1707	LbrM.24.0830	0.0				1606	LinJ.02.0270	0.0	1816	LinJ.29.2320	0.0
						1707	LbrM.23.1640	0.0				1606	LinJ.34.2340	0.0	1816	LinJ.19.0740	0.0
						1707	LbrM.28.2300	0.0				1606	LinJ.17.0140	0.0	1816	LinJ.19.0960	0.0
						1707	LbrM.35.1660	0.0				1606	LinJ.17.0130	0.0	1816	LinJ.28.2190	0.0
						1707	LbrM.33.3550	0.0				1606	LinJ.10.0900	0.0	1816	LinJ.19.1540	0.0
						1707	LbrM.35.5790	0.0				1606	LinJ.23.1640	0.0	1816	LinJ.29.1400	0.0
						1707	LbrM.25.0910	0.0				1606	LinJ.09.0640	0.0	1816	LinJ.19.1580	0.0
						1707	LbrM.32.3500	0.0				1606	LinJ.33.2790	0.0	1816	LinJ.20.0040	0.0
						1707	LbrM.25.0810	0.0				1606	LinJ.21.0400	0.0	1816	LinJ.31.2960	0.0
						1707	LbrM.35.4730	0.0				1606	LinJ.01.0590	0.0	1816	LinJ.20.0540	0.0
						1707	LbrM.25.1670	0.0				1606	LinJ.30.1130	0.0	1816	LinJ.33.1420	0.0
						1707	LbrM.33.2440	0.0				1606	LinJ.32.1960	0.0	1816	LinJ.21.0210	0.0
						1707	LbrM.25.1880	0.0				1606	LinJ.18.0350	0.0	1816	LinJ.23.0040	0.0
						1707	LbrM.30.0390	0.0				1606	LinJ.25.2130	0.0	1816	LinJ.30.3110	0.0
						1707	LbrM.32.0760	0.0				1606	LinJ.01.0240	0.0	1816	LinJ.25.1310	0.0
						1707	LbrM.29.2350	0.0				1606	LinJ.04.1010	0.0	1816	LinJ.21.0160	0.0
						1707	LbrM.26.0610	0.0							1816	LinJ.21.0170	0.0
						1707	LbrM.26.0520	0.0							1816	LinJ.21.0690	0.0
						1707	LbrM.26.1370	0.0							1816	LinJ.28.0310	0.0
						1707	LbrM.27.2380	0.0							1816	LinJ.21.1880	0.0
						1707	LbrM.30.2200	0.0							1816	LinJ.21.2060	0.0
						1707	LbrM.35.4690	0.0							1816	LinJ.24.0420	0.0
						1707	LbrM.34.5310	0.0							1816	LinJ.24.1710	0.0
						1707	LbrM.33.2880	0.0							1816	LinJ.36.6810	0.0
						1707	LbrM.28.1640	0.0							1816	LinJ.21.2180	0.0
						1707	LbrM.35.3200	0.0							1816	LinJ.34.2560	0.0
						1707	LbrM.26.2180	0.0							1816	LinJ.36.0710	0.0
						1707	LbrM.26.2660	0.0							1816	LinJ.36.5470	0.0
						1707	LbrM.33.3330	0.0							1816	LinJ.22.0670	0.0
						1707	LbrM.35.4260	0.0							1816	LinJ.27.1890	0.0
						1707	LbrM.30.0020	0.0							1816	LinJ.35.2650	0.0
						1707	LbrM.34.3920	0.0							1816	LinJ.30.3010	0.0
						1707	LbrM.28.0150	0.0							1816	LinJ.22.1340	0.0
						1707	LbrM.34.0080	0.0							1816	LinJ.29.0450	0.0
						1707	LbrM.33.3110	0.0							1816	LinJ.30.3330	0.0
						1707	LbrM.28.0350	0.0							1816	LinJ.22.1500	0.0
						1707	LbrM.28.1490	0.0							1816	LinJ.28.0140	0.0
						1707	LbrM.31.0350	0.0							1816	LinJ.23.0130	0.0
						1707	LbrM.28.1010	0.0							1816	LinJ.23.0160	0.0
						1707	LbrM.35.6060	0.0							1816	LinJ.30.0140	0.0
						1707	LbrM.34.4940	0.0							1816	LinJ.23.0680	0.0
						1707	LbrM.35.0170	0.0							1816	LinJ.23.0690	0.0
						1707	LbrM.34.2970	0.0							1816	LinJ.23.1000	0.0
						1707	LbrM.29.0330	0.0							1816	LinJ.23.1440	0.0
						1707	LbrM.28.3250	0.0							1816	LinJ.31.0620	0.0
						1707	LbrM.30.0270	0.0							1816	LinJ.23.1570	0.0
						1707	LbrM.34.4180	0.0							1816	LinJ.23.1790	0.0
						1707	LbrM.29.0270	0.0							1816	LinJ.24.0650	0.0
						1707	LbrM.33.2670	0.0							1816	LinJ.24.0830	0.0
						1707	LbrM.35.3690	0.0							1816	LinJ.27.2460	0.0
						1707	LbrM.30.3160	0.0							1816	LinJ.28.0650	0.0
						1707	LbrM.31.0700	0.0							1816	LinJ.36.1010	0.0
						1707	LbrM.32.0790	0.0							1816	LinJ.24.1860	0.0
						1707	LbrM.32.2670	0.0							1816	LinJ.28.2250	0.0
						1707	LbrM.34.1480	0.0							1816	LinJ.33.3420	0.0
[truncated: 142 more rows]
